# Supplementary material for: Genome-wide analysis reveals adaptation to high altitudes in Tibetan sheep
Source: PubMed Central journal article supplement (PMC4882523; doi:10.1038/srep26770), 2016-05-27
Supplement: srep26770-s1.pdf [file srep26770-s1.pdf]

## Title

Genome-wide analysis reveals adaptation to high-altitude in Tibetan sheep

## Author list

Caihong Wei, Huihua Wang, Gang Liu, Fuping Zhao, James W. Kijas, Youji Ma, Jian Lu, Li Zhang, Jiaxue Cao, Mingming Wu, Guangkai Wang, Ruizao Liu, Zhen Liu, Shuzhen Zhang, Chousheng Liu, Lixin Du

## Supplementary Information

Table S1. The details of 7 sheep populations (breeds)

Table S2. A total of 464 SNPs which were within the top 1% of  $F_{ST}$  value distribution

Table S3. A total of 2001 SNPs which were within the top 5% of XPEHH value distribution

Table S4. Annotation of a SNP which both have high  $F_{ST}$  and XPEHH value

Table S5. Annotation of a SNP which just have high  $F_{ST}$  value

Table S6. List of a priori function candidate genes

Table S7. Six hematologic parameters information for TIB and LTH breeds

Table S8. Summary of variation consequences in EPAS1 gene

Table S9. The MAF and  $X^2$  for each locus of TIB and LTH breed

Table S10. PCR primers used in this study

## Figure legends

Figure S1. Mean  $L(K)$  ( $\pm$ SD) for each K value.

Figure S2. Structure analysis on all the individuals with  $K=2-4$ . The abbreviations for the 7 China native breeds are shown in Supplemental table S1

**Table S1. The details of 7 sheep populations (breeds)**

| <b>Code</b>       | <b>Breed name</b>      | <b>Location</b> | <b>Altitude (m)</b> | <b>n</b> | <b>SNP no.</b> | <b>Nucleotide diversity<br/><math>\pi (\times 10^{-6})</math></b> |
|-------------------|------------------------|-----------------|---------------------|----------|----------------|-------------------------------------------------------------------|
| HUS               | Hu sheep               | Jiangsu         | 50                  | 12       | 43,618         | 7.61                                                              |
| TON               | Tong sheep             | Shaanxi         | 850                 | 15       | 44,642         | 7.66                                                              |
| LTH               | Large-tailed Han sheep | Shandong        | 50                  | 15       | 44,536         | 7.65                                                              |
| LOP               | Lop sheep              | Xinjiang        | 887                 | 15       | 45,349         | 7.84                                                              |
| TIBQ              | Plateau-type Tibetan   | Qinghai         | 3500                | 14       | 44,415         | 7.64                                                              |
| TIBS              | Valley-type Tibetan    | Sichuan         | 3500                | 14       | 43,782         | 7.51                                                              |
| TIBN <sup>#</sup> | Tibetan sheep          | Nagqu           | 4500                | 37       | 44,948         | 7.32                                                              |

# Ovine HapMap project data

**Table S2. A total of 464 SNPs which were within the top 1% of  $F_{ST}$  value distribution**

| SNP-ID           | Chromosome | Position  | $F_{ST}$ ( top 1%) | $p$ -value (Simul $F_{ST}<$ sample $F_{ST}$ ) | FDR     |
|------------------|------------|-----------|--------------------|-----------------------------------------------|---------|
| OAR10_29511510.1 | 10         | 29476678  | 0.866              | 1.0000                                        | outlier |
| OAR10_29469450.1 | 10         | 29436435  | 0.801              | 1.0000                                        | outlier |
| s27419.1         | 13         | 48968332  | 0.788              | 1.0000                                        | outlier |
| s05744.1         | 3          | 40080488  | 0.782              | 1.0000                                        | outlier |
| OAR13_52482285.1 | 13         | 49006951  | 0.775              | 1.0000                                        | outlier |
| s53921.1         | 3          | 40294935  | 0.749              | 1.0000                                        | outlier |
| OAR15_3091174.1  | 15         | 3706790   | 0.748              | 1.0000                                        | outlier |
| OAR13_52630089.1 | 13         | 49140884  | 0.745              | 1.0000                                        | outlier |
| OAR4_72720594.1  | 4          | 68754789  | 0.722              | 1.0000                                        | outlier |
| OAR10_29538398.1 | 10         | 29502667  | 0.721              | 1.0000                                        | outlier |
| OAR3_165009241.1 | 3          | 154213690 | 0.671              | 1.0000                                        | outlier |
| OAR4_72568832.1  | 4          | 68601186  | 0.657              | 1.0000                                        | outlier |
| OAR13_51727898.1 | 13         | 48493120  | 0.626              | 1.0000                                        | outlier |
| OAR1_100921673.1 | 1          | 94993712  | 0.625              | 1.0000                                        | outlier |
| OAR2_143916009.1 | 2          | 135304995 | 0.619              | 1.0000                                        | outlier |
| OAR15_3236575.1  | 15         | 3875564   | 0.600              | 1.0000                                        | outlier |
| s51799.1         | 3          | 40441564  | 0.556              | 1.0000                                        | outlier |
| OAR11_18701428.1 | 11         | 18325488  | 0.538              | 1.0000                                        | outlier |
| OAR11_18711856.1 | 11         | 18335747  | 0.538              | 1.0000                                        | outlier |
| s64982.1         | 3          | 93725974  | 0.534              | 1.0000                                        | outlier |
| s67952.1         | 3          | 93522006  | 0.533              | 1.0000                                        | outlier |
| OAR4_51489408.1  | 4          | 48669962  | 0.523              | 1.0000                                        | outlier |
| OAR11_18815864.1 | 11         | 18433474  | 0.510              | 1.0000                                        | outlier |
| OAR2_143949087.1 | 2          | 135337045 | 0.509              | 1.0000                                        | outlier |
| OAR13_51852034.1 | 13         | 48623826  | 0.494              | 1.0000                                        | outlier |
| OAR2_143068480.1 | 2          | 134598112 | 0.494              | 1.0000                                        | outlier |
| s55494.1         | 7          | 82545552  | 0.493              | 1.0000                                        | outlier |
| OAR2_86948508.1  | 2          | 81785728  | 0.492              | 1.0000                                        | outlier |
| OAR15_78598295.1 | 15         | 72520678  | 0.490              | 1.0000                                        | outlier |
| s74549.1         | 19         | 29047903  | 0.485              | 1.0000                                        | outlier |
| OAR11_27654920.1 | 11         | 26421905  | 0.480              | 1.0000                                        | outlier |
| OAR3_43027143.1  | 3          | 40285089  | 0.479              | 1.0000                                        | outlier |
| OAR1_101357689.1 | 1          | 95153594  | 0.474              | 1.0000                                        | outlier |
| OAR3_43817056.1  | 3          | 40956953  | 0.467              | 1.0000                                        | outlier |
| OAR4_73050615.1  | 4          | 69082247  | 0.466              | 1.0000                                        | outlier |
| s08514.1         | 3          | 39851694  | 0.464              | 1.0000                                        | outlier |
| OAR11_18823250.1 | 11         | 18440783  | 0.464              | 1.0000                                        | outlier |
| OAR2_87089443.1  | 2          | 81887124  | 0.464              | 1.0000                                        | outlier |
| OAR22_45509727.1 | 22         | 40482146  | 0.456              | 1.0000                                        | outlier |
| OAR3_43504420.1  | 3          | 40657958  | 0.453              | 1.0000                                        | outlier |
| OAR3_43472281.1  | 3          | 40625901  | 0.451              | 1.0000                                        | outlier |

|                             |    |           |       |        |         |
|-----------------------------|----|-----------|-------|--------|---------|
| s71169.1                    | 3  | 129759745 | 0.451 | 1.0000 | outlier |
| OAR9_99601991.1             | 9  | 93576726  | 0.447 | 1.0000 | outlier |
| OAR13_51134025_X.1          | 13 | 47855248  | 0.446 | 1.0000 | outlier |
| OAR13_51167861.1            | 13 | 47875474  | 0.446 | 1.0000 | outlier |
| s55347.1                    | 1  | 183336939 | 0.443 | 1.0000 | outlier |
| s65195.1                    | 2  | 81853228  | 0.442 | 1.0000 | outlier |
| s03078.1                    | 13 | 33058560  | 0.440 | 1.0000 | outlier |
| s12519.1                    | 8  | 56125455  | 0.433 | 1.0000 | outlier |
| OAR15_37466891.1            | 15 | 35619819  | 0.432 | 1.0000 | outlier |
| OAR1_100874172.1            | 1  | 94940617  | 0.430 | 1.0000 | outlier |
| OAR2_239847244.1            | 2  | 227091775 | 0.427 | 0.9999 | outlier |
| OAR13_30121681.1            | 13 | 27225608  | 0.426 | 1.0000 | outlier |
| OAR15_3164045.1             | 15 | 3805470   | 0.426 | 1.0000 | outlier |
| OAR15_2886961.1             | 15 | 3462742   | 0.425 | 1.0000 | outlier |
| OAR3_79206128.1             | 3  | 74982457  | 0.422 | 1.0000 | outlier |
| OAR3_42907435.1             | 3  | 40163832  | 0.422 | 1.0000 | outlier |
| s19503.1                    | 22 | 36806429  | 0.420 | 1.0000 | outlier |
| s14577.1                    | 7  | 26755264  | 0.420 | 1.0000 | outlier |
| s38150.1                    | 12 | 29228207  | 0.419 | 1.0000 | outlier |
| OAR1_264734445.1            | 1  | 245155764 | 0.413 | 1.0000 | outlier |
| OAR2_193444466_X.1          | 2  | 182607165 | 0.413 | 1.0000 | outlier |
| OAR1_248957744.1            | 1  | 230972639 | 0.412 | 1.0000 | outlier |
| s31340.1                    | 15 | 72536427  | 0.411 | 1.0000 | outlier |
| OAR3_127924329_X.1          | 3  | 120136049 | 0.410 | 1.0000 | outlier |
| OAR4_93067608.1             | 4  | 87649810  | 0.409 | 1.0000 | outlier |
| OAR20_9311938.1             | 20 | 9187047   | 0.408 | 1.0000 | outlier |
| s27209.1                    | 12 | 68444880  | 0.405 | 1.0000 | outlier |
| OAR6_67376317.1             | 6  | 61138606  | 0.405 | 1.0000 | outlier |
| OAR15_68933568.1            | 15 | 63386447  | 0.402 | 1.0000 | outlier |
| OAR3_44507744.1             | 3  | 41591060  | 0.401 | 1.0000 | outlier |
| OAR9_38221892.1             | 9  | 36285902  | 0.398 | 1.0000 | outlier |
| OAR2_193238074.1            | 2  | 182395047 | 0.396 | 1.0000 | outlier |
| OAR6_92321965.1             | 6  | 84350628  | 0.392 | 1.0000 | outlier |
| OARUn.1355_45411.1          | 15 | 3575948   | 0.387 | 1.0000 | outlier |
| OAR2_142924312.1            | 2  | 134460137 | 0.379 | 1.0000 | outlier |
| OAR3_98710538.1             | 3  | 93004742  | 0.378 | 1.0000 | outlier |
| s61354.1                    | 5  | 90586440  | 0.378 | 1.0000 | outlier |
| OAR21_50378541.1            | 21 | 45368906  | 0.378 | 1.0000 | outlier |
| OARUn.1355_20915.1          | 15 | 3546667   | 0.378 | 0.9999 | outlier |
| OAR20_15759478.1            | 20 | 14939837  | 0.377 | 1.0000 | outlier |
| s71975.1                    | 14 | 16349731  | 0.375 | 1.0000 | outlier |
| OAR2_61008309.1             | 2  | 56714900  | 0.371 | 0.9999 | outlier |
| 250506CS3900140500001_312.1 | 23 | 26298017  | 0.366 | 1.0000 | outlier |
| OAR21_28243839.1            | 21 | 25299666  | 0.364 | 1.0000 | outlier |

|                  |    |           |       |        |         |
|------------------|----|-----------|-------|--------|---------|
| s58920.1         | 17 | 52092174  | 0.364 | 1.0000 | outlier |
| OAR10_36999163.1 | 10 | 36238012  | 0.363 | 1.0000 | outlier |
| OAR4_10748026.1  | 4  | 10609123  | 0.362 | 1.0000 | outlier |
| s37576.1         | 19 | 59099916  | 0.362 | 1.0000 | outlier |
| s19461.1         | 22 | 39739539  | 0.362 | 0.9999 | outlier |
| s26969.1         | 10 | 35629123  | 0.361 | 1.0000 | outlier |
| OAR26_30396501.1 | 26 | 26301170  | 0.361 | 1.0000 | outlier |
| OAR13_87428154.1 | 13 | 81349148  | 0.361 | 1.0000 | outlier |
| OAR1_197916874.1 | 1  | 183420073 | 0.360 | 1.0000 | outlier |
| OAR7_63745942.1  | 7  | 57816492  | 0.359 | 1.0000 | outlier |
| s14938.1         | 9  | 795580    | 0.358 | 1.0000 | outlier |
| s56763.1         | 5  | 15912332  | 0.357 | 1.0000 | outlier |
| OAR5_87050329.1  | 5  | 79186927  | 0.353 | 1.0000 | outlier |
| OAR15_2999185.1  | 15 | 3499482   | 0.353 | 1.0000 | outlier |
| OAR10_37157671.1 | 10 | 36385864  | 0.350 | 1.0000 | outlier |
| s11336.1         | 4  | 87572495  | 0.349 | 1.0000 | outlier |
| OAR2_193298829.1 | 2  | 182455753 | 0.349 | 1.0000 | outlier |
| OAR10_36395007.1 | 10 | 35665391  | 0.348 | 1.0000 | outlier |
| OAR3_200888015.1 | 3  | 186673626 | 0.347 | 1.0000 | outlier |
| s40780.1         | 2  | 9434535   | 0.346 | 1.0000 | outlier |
| s42972.1         | 1  | 261414809 | 0.346 | 1.0000 | outlier |
| OAR3_126195855.1 | 3  | 118325231 | 0.345 | 1.0000 | outlier |
| OAR16_28431987.1 | 16 | 26210763  | 0.345 | 1.0000 | outlier |
| OAR9_4919393.1   | 9  | 5044855   | 0.345 | 1.0000 | outlier |
| s48402.1         | 2  | 60634939  | 0.345 | 1.0000 | outlier |
| OAR2_60972128.1  | 2  | 56679411  | 0.343 | 1.0000 | outlier |
| s45108.1         | 1  | 257631364 | 0.343 | 1.0000 | outlier |
| OAR4_80605717.1  | 4  | 76007878  | 0.338 | 1.0000 | outlier |
| OAR13_2388727.1  | 13 | 1861848   | 0.338 | 0.9998 | outlier |
| s51138.1         | 13 | 47654121  | 0.338 | 1.0000 | outlier |
| OAR4_10443301.1  | 4  | 10281638  | 0.337 | 1.0000 | outlier |
| s39564.1         | 13 | 43797381  | 0.337 | 1.0000 | outlier |
| s40281.1         | 5  | 95197731  | 0.336 | 1.0000 | outlier |
| OAR3_200125923.1 | 3  | 185881136 | 0.336 | 1.0000 | outlier |
| OAR5_50467325.1  | 5  | 46381328  | 0.335 | 1.0000 | outlier |
| OAR10_36819129.1 | 10 | 36064927  | 0.335 | 1.0000 | outlier |
| OAR7_63342726.1  | 7  | 57353770  | 0.335 | 1.0000 | outlier |
| s48664.1         | 3  | 138528430 | 0.335 | 1.0000 | outlier |
| OAR1_107504871.1 | 1  | 100185774 | 0.335 | 1.0000 | outlier |
| s25992.1         | 3  | 136237659 | 0.335 | 1.0000 | outlier |
| OAR9_55485114.1  | 9  | 53015370  | 0.335 | 1.0000 | outlier |
| OAR10_28697870.1 | 10 | 28685295  | 0.335 | 0.9998 | outlier |
| OAR19_33605872.1 | 19 | 31927501  | 0.335 | 1.0000 | outlier |
| OAR9_82428531.1  | 9  | 77756891  | 0.333 | 1.0000 | outlier |

|                   |    |           |       |        |         |
|-------------------|----|-----------|-------|--------|---------|
| OAR4_91329005.1   | 4  | 85930010  | 0.332 | 0.9998 | outlier |
| s23936.1          | 1  | 114785821 | 0.332 | 1.0000 | outlier |
| DU299931_445.1    | 2  | 81407809  | 0.332 | 0.9999 | outlier |
| OAR15_53721488.1  | 15 | 49215124  | 0.332 | 1.0000 | outlier |
| s66575.1          | 4  | 47439380  | 0.332 | 0.9998 | outlier |
| OAR19_14489436.1  | 19 | 13918425  | 0.332 | 1.0000 | outlier |
| DU223332_376.1    | 2  | 59569826  | 0.331 | 1.0000 | outlier |
| s58048.1          | 2  | 52441926  | 0.330 | 1.0000 | outlier |
| OAR22_34323192.1  | 22 | 29843623  | 0.330 | 1.0000 | outlier |
| OAR7_63848145.1   | 7  | 57915106  | 0.330 | 0.9998 | outlier |
| OAR8_60234503.1   | 8  | 56216655  | 0.330 | 1.0000 | outlier |
| OAR3_82409790.1   | 3  | 77879156  | 0.329 | 1.0000 | outlier |
| OAR20_4842571.1   | 20 | 4835005   | 0.329 | 1.0000 | outlier |
| OAR1_130003540.1  | 1  | 119845352 | 0.328 | 1.0000 | outlier |
| s54574.1          | 13 | 6202204   | 0.327 | 1.0000 | outlier |
| s67679.1          | 5  | 16017146  | 0.325 | 1.0000 | outlier |
| s12884.1          | 13 | 62857560  | 0.324 | 1.0000 | outlier |
| OAR5_80804886.1   | 5  | 73554040  | 0.322 | 1.0000 | outlier |
| s32443.1          | 1  | 115427224 | 0.322 | 1.0000 | outlier |
| s31325.1          | 2  | 182097199 | 0.322 | 1.0000 | outlier |
| OAR1_248968063.1  | 1  | 230981011 | 0.321 | 1.0000 | outlier |
| s07580.1          | 5  | 46208843  | 0.320 | 1.0000 | outlier |
| OAR5_87409839_X.1 | 5  | 79542631  | 0.320 | 1.0000 | outlier |
| s60101.1          | 3  | 186540552 | 0.319 | 1.0000 | outlier |
| OAR8_51076568.1   | 8  | 47596948  | 0.319 | 0.9997 | outlier |
| s04315.1          | 3  | 136258983 | 0.318 | 1.0000 | outlier |
| OAR4_93024080.1   | 4  | 87602738  | 0.318 | 1.0000 | outlier |
| OAR2_128835133.1  | 2  | 120501335 | 0.318 | 0.9997 | outlier |
| OAR2_86617792.1   | 2  | 81452694  | 0.318 | 0.9999 | outlier |
| OAR3_42729807.1   | 3  | 39986491  | 0.317 | 1.0000 | outlier |
| OAR2_31412377.1   | 2  | 30492514  | 0.317 | 0.9998 | outlier |
| OAR4_73786063.1   | 4  | 69811362  | 0.317 | 0.9998 | outlier |
| s44167.1          | 2  | 243153063 | 0.316 | 1.0000 | outlier |
| s46185.1          | 13 | 78420224  | 0.316 | 1.0000 | outlier |
| OAR10_28087786.1  | 10 | 28071590  | 0.315 | 1.0000 | outlier |
| OAR15_22404265.1  | 15 | 21482600  | 0.315 | 0.9994 | outlier |
| s34725.1          | 2  | 13129990  | 0.314 | 1.0000 | outlier |
| OAR4_25295648.1   | 4  | 24132337  | 0.313 | 0.9994 | outlier |
| OAR7_47161420.1   | 7  | 42551974  | 0.313 | 0.9994 | outlier |
| s66483.1          | 5  | 46430611  | 0.313 | 1.0000 | outlier |
| s41913.1          | 1  | 2870378   | 0.312 | 1.0000 | outlier |
| OAR3_43559179_X.1 | 3  | 40713016  | 0.312 | 0.9994 | outlier |
| s49062.1          | 18 | 46100361  | 0.311 | 0.9994 | outlier |
| OAR3_124838365.1  | 3  | 116944852 | 0.311 | 1.0000 | outlier |

|                    |    |           |       |        |         |
|--------------------|----|-----------|-------|--------|---------|
| OAR17_67295616.1   | 17 | 61733069  | 0.310 | 1.0000 | outlier |
| s67316.1           | 22 | 36740014  | 0.310 | 1.0000 | outlier |
| DU177621_558.1     | 19 | 53781872  | 0.309 | 1.0000 | outlier |
| s05344.1           | 23 | 26312088  | 0.309 | 1.0000 | outlier |
| OAR3_195730138.1   | 3  | 181711513 | 0.307 | 0.9998 | outlier |
| OAR12_37060968.1   | 12 | 33067355  | 0.307 | 1.0000 | outlier |
| s08464.1           | 24 | 35991517  | 0.307 | 0.9998 | outlier |
| OAR19_60184770.1   | 19 | 56634864  | 0.307 | 1.0000 | outlier |
| s60112.1           | 2  | 68855701  | 0.305 | 1.0000 | outlier |
| s54559.1           | 13 | 52129026  | 0.305 | 1.0000 | outlier |
| OAR3_165050963.1   | 3  | 154252449 | 0.305 | 1.0000 | outlier |
| OAR4_9681181_X.1   | 4  | 9567863   | 0.305 | 1.0000 | outlier |
| s24597.1           | 14 | 49053815  | 0.304 | 1.0000 | outlier |
| OAR3_45905654.1    | 3  | 42874992  | 0.303 | 0.9999 | outlier |
| s30783.1           | 9  | 28233297  | 0.303 | 1.0000 | outlier |
| OAR2_55853730.1    | 2  | 52254402  | 0.303 | 1.0000 | outlier |
| OAR18_27752153.1   | 18 | 26754749  | 0.303 | 1.0000 | outlier |
| s50255.1           | 3  | 220327385 | 0.301 | 1.0000 | outlier |
| OAR6_15846520.1    | 6  | 13261000  | 0.300 | 1.0000 | outlier |
| s19468.1           | 10 | 30993691  | 0.300 | 1.0000 | outlier |
| s07332.1           | 5  | 16209393  | 0.300 | 1.0000 | outlier |
| s69458.1           | 22 | 40594059  | 0.300 | 1.0000 | outlier |
| s01490.1           | 3  | 180726856 | 0.299 | 0.9995 | outlier |
| s00950.1           | 2  | 81689824  | 0.299 | 1.0000 | outlier |
| s66464.1           | 10 | 35981007  | 0.299 | 1.0000 | outlier |
| OAR10_36746264.1   | 10 | 35992688  | 0.299 | 1.0000 | outlier |
| OAR2_156184412.1   | 2  | 147210213 | 0.299 | 1.0000 | outlier |
| OAR3_126212728.1   | 3  | 118343013 | 0.298 | 1.0000 | outlier |
| s58543.1           | 13 | 12265286  | 0.298 | 1.0000 | outlier |
| OAR13_36331465.1   | 13 | 32978582  | 0.298 | 0.9997 | outlier |
| s32322.1           | 1  | 96005302  | 0.298 | 1.0000 | outlier |
| s72346.1           | 25 | 42689823  | 0.298 | 0.9992 | outlier |
| OAR25_12256905.1   | 25 | 12080800  | 0.297 | 1.0000 | outlier |
| OAR12_72924306.1   | 12 | 66252130  | 0.297 | 0.9995 | outlier |
| OAR7_6367591.1     | 7  | 6512317   | 0.296 | 1.0000 | outlier |
| OAR3_109576568.1   | 3  | 103216209 | 0.295 | 0.9992 | outlier |
| s38680.1           | 5  | 16520048  | 0.295 | 1.0000 | outlier |
| OAR13_63161846.1   | 13 | 58023662  | 0.294 | 1.0000 | outlier |
| OAR1_248896910_X.1 | 1  | 230903245 | 0.294 | 1.0000 | outlier |
| OAR2_60936578.1    | 2  | 56639600  | 0.293 | 0.9997 | outlier |
| OAR13_70737254.1   | 13 | 65652628  | 0.293 | 0.9992 | outlier |
| s18401.1           | 13 | 65660964  | 0.293 | 0.9992 | outlier |
| s33002.1           | 5  | 48043887  | 0.293 | 0.9997 | outlier |
| OAR5_52351898.1    | 5  | 48128800  | 0.293 | 0.9997 | outlier |

|                    |    |           |       |        |         |
|--------------------|----|-----------|-------|--------|---------|
| OAR9_25714308.1    | 9  | 24740849  | 0.293 | 0.9997 | outlier |
| OAR17_44358460.1   | 17 | 41064820  | 0.292 | 1.0000 | outlier |
| OAR17_31561091.1   | 17 | 28790576  | 0.292 | 0.9997 | outlier |
| OAR4_73842776_X.1  | 4  | 69869475  | 0.291 | 1.0000 | outlier |
| OAR11_6228500.1    | 11 | 6725442   | 0.291 | 1.0000 | outlier |
| OAR18_56445082.1   | 18 | 52750500  | 0.291 | 1.0000 | outlier |
| s10546.1           | 8  | 87520897  | 0.291 | 0.9999 | outlier |
| OAR16_51559181.1   | 16 | 47383354  | 0.291 | 1.0000 | outlier |
| OAR1_45270297.1    | 1  | 43681990  | 0.291 | 1.0000 | outlier |
| s33982.1           | 22 | 44880164  | 0.290 | 1.0000 | outlier |
| s71442.1           | 10 | 82994149  | 0.290 | 1.0000 | outlier |
| s66349.1           | 1  | 68199001  | 0.289 | 1.0000 | outlier |
| s35678.1           | 11 | 51495855  | 0.289 | 1.0000 | outlier |
| s04523.1           | 14 | 13071092  | 0.289 | 1.0000 | outlier |
| OAR3_112640501.1   | 3  | 105894007 | 0.289 | 0.9999 | outlier |
| OAR5_110742508.1   | 5  | 101776198 | 0.289 | 1.0000 | outlier |
| OAR4_72440076.1    | 4  | 68468908  | 0.288 | 1.0000 | outlier |
| s63142.1           | 13 | 32868564  | 0.288 | 1.0000 | outlier |
| OAR2_138672719.1   | 2  | 130334245 | 0.288 | 1.0000 | outlier |
| OAR2_55861669.1    | 2  | 52266474  | 0.288 | 1.0000 | outlier |
| s49602.1           | 2  | 248590000 | 0.288 | 1.0000 | outlier |
| OAR3_124131226.1   | 3  | 116419981 | 0.288 | 1.0000 | outlier |
| OAR4_51625352.1    | 4  | 48804045  | 0.288 | 1.0000 | outlier |
| s51044.1           | 3  | 7462549   | 0.288 | 1.0000 | outlier |
| OAR15_66701694.1   | 15 | 61349591  | 0.287 | 1.0000 | outlier |
| s66058.1           | 9  | 32100676  | 0.286 | 0.9996 | outlier |
| OAR3_184174208_X.1 | 3  | 171572613 | 0.286 | 1.0000 | outlier |
| OAR22_11354622.1   | 22 | 9513923   | 0.285 | 0.9998 | outlier |
| s66125.1           | 3  | 93671110  | 0.284 | 1.0000 | outlier |
| OAR19_38829925.1   | 19 | 37027503  | 0.284 | 1.0000 | outlier |
| s22470.1           | 2  | 175650501 | 0.284 | 1.0000 | outlier |
| OAR13_46575198.1   | 13 | 43303706  | 0.283 | 1.0000 | outlier |
| OAR5_87274003.1    | 5  | 79408583  | 0.282 | 1.0000 | outlier |
| OAR3_195698523.1   | 3  | 181680527 | 0.282 | 1.0000 | outlier |
| s22929.1           | 10 | 35885222  | 0.281 | 1.0000 | outlier |
| OAR2_86819880.1    | 2  | 81666272  | 0.281 | 1.0000 | outlier |
| OAR8_67122251.1    | 8  | 62326453  | 0.280 | 0.9995 | outlier |
| OAR1_268122939.1   | 1  | 248275678 | 0.280 | 0.9990 | outlier |
| OAR3_127956387_X.1 | 3  | 120178240 | 0.280 | 0.9990 | outlier |
| OAR3_126893362.1   | 3  | 118982570 | 0.280 | 0.9992 | outlier |
| OAR3_96170847.1    | 3  | 90549311  | 0.279 | 0.9990 | outlier |
| OAR7_43027191.1    | 7  | 38944126  | 0.279 | 0.9990 | outlier |
| OAR4_74539177.1    | 4  | 70467338  | 0.279 | 0.9994 | outlier |
| OAR17_52473999.1   | 17 | 48148077  | 0.279 | 1.0000 | outlier |



|                    |    |           |       |        |         |
|--------------------|----|-----------|-------|--------|---------|
| OAR13_14410176.1   | 13 | 14295797  | 0.279 | 1.0000 | outlier |
| OAR1_281649480.1   | 1  | 260317241 | 0.278 | 0.9994 | outlier |
| s16895.1           | 5  | 23139577  | 0.278 | 1.0000 | outlier |
| OAR8_67085709.1    | 8  | 62289907  | 0.278 | 1.0000 | outlier |
| OAR3_126384508.1   | 3  | 118516904 | 0.278 | 0.9990 | outlier |
| OAR11_3180902.1    | 11 | 3834100   | 0.278 | 0.9992 | outlier |
| s49314.1           | 7  | 57002225  | 0.277 | 1.0000 | outlier |
| OAR16_34243483.1   | 16 | 31525482  | 0.277 | 1.0000 | outlier |
| OAR11_32450209.1   | 11 | 30567032  | 0.277 | 1.0000 | outlier |
| OAR1_177805968.1   | 1  | 164847462 | 0.277 | 1.0000 | outlier |
| OAR4_5373295.1     | 4  | 5154846   | 0.277 | 1.0000 | outlier |
| OAR23_49635171_X.1 | 23 | 46823961  | 0.277 | 1.0000 | outlier |
| OAR5_22783606.1    | 5  | 20089099  | 0.277 | 1.0000 | outlier |
| OAR5_87366264.1    | 5  | 79478908  | 0.277 | 1.0000 | outlier |
| OAR16_26522451.1   | 16 | 24393554  | 0.277 | 1.0000 | outlier |
| s19512.1           | 3  | 76037302  | 0.276 | 0.9992 | outlier |
| OAR2_195165011.1   | 2  | 184070090 | 0.276 | 1.0000 | outlier |
| OAR16_27229721.1   | 16 | 25021431  | 0.276 | 1.0000 | outlier |
| s02602.1           | 1  | 200729179 | 0.276 | 1.0000 | outlier |
| OAR10_18066560.1   | 10 | 18955751  | 0.276 | 1.0000 | outlier |
| s52780.1           | 14 | 13058130  | 0.276 | 1.0000 | outlier |
| OAR1_264697118.1   | 1  | 245120011 | 0.276 | 1.0000 | outlier |
| OAR4_37225390.1    | 4  | 35004679  | 0.275 | 1.0000 | outlier |
| OAR15_60961014.1   | 15 | 55556375  | 0.274 | 1.0000 | outlier |
| OAR9_81909760.1    | 9  | 77297358  | 0.274 | 0.9999 | outlier |
| OAR3_42529367.1    | 3  | 39786723  | 0.274 | 0.9997 | outlier |
| OAR1_47449016.1    | 1  | 45758020  | 0.274 | 1.0000 | outlier |
| OAR14_33142743.1   | 14 | 31832814  | 0.274 | 0.9999 | outlier |
| s71728.1           | 17 | 71871881  | 0.274 | 0.9999 | outlier |
| OAR3_53590166.1    | 3  | 50888555  | 0.273 | 1.0000 | outlier |
| OAR15_42233005.1   | 15 | 40231054  | 0.273 | 1.0000 | outlier |
| s38567.1           | 19 | 7169893   | 0.273 | 1.0000 | outlier |
| OAR19_33593848.1   | 19 | 31915771  | 0.273 | 1.0000 | outlier |
| OAR3_99616457.1    | 3  | 93809000  | 0.273 | 0.9999 | outlier |
| OAR1_24797111.1    | 1  | 24578785  | 0.273 | 1.0000 | outlier |
| OAR10_68163245.1   | 10 | 65948793  | 0.273 | 1.0000 | outlier |
| OAR2_161368305.1   | 2  | 152215629 | 0.273 | 0.9999 | outlier |
| OAR3_124143775.1   | 3  | 116431606 | 0.272 | 1.0000 | outlier |
| OAR6_5659766.1     | 6  | 3750660   | 0.272 | 0.9999 | outlier |
| OAR2_142646641.1   | 2  | 134194138 | 0.270 | 0.9999 | outlier |
| OAR10_44207570.1   | 10 | 43591931  | 0.270 | 0.9993 | outlier |
| OAR16_14772180.1   | 16 | 13643499  | 0.270 | 0.9992 | outlier |
| OAR22_6354636.1    | 22 | 5331079   | 0.269 | 1.0000 | outlier |
| OAR2_60563723.1    | 2  | 56274688  | 0.269 | 0.9992 | outlier |

|                  |    |           |       |        |         |
|------------------|----|-----------|-------|--------|---------|
| OAR2_209681146.1 | 2  | 198116050 | 0.269 | 0.9995 | outlier |
| s29038.1         | 15 | 40156061  | 0.269 | 1.0000 | outlier |
| OAR10_57242083.1 | 10 | 56100245  | 0.268 | 0.9995 | outlier |
| OAR6_31012935.1  | 6  | 27322530  | 0.268 | 1.0000 | outlier |
| OAR25_32156972.1 | 25 | 30802961  | 0.268 | 1.0000 | outlier |
| OAR23_9974468.1  | 23 | 9065236   | 0.267 | 1.0000 | outlier |
| s23150.1         | 19 | 44272835  | 0.267 | 0.9998 | outlier |
| s64015.1         | 23 | 46368708  | 0.267 | 0.9995 | outlier |
| OAR2_142882312.1 | 2  | 134417645 | 0.266 | 1.0000 | outlier |
| OAR2_155715202.1 | 2  | 146734798 | 0.266 | 0.9991 | outlier |
| s32813.1         | 7  | 39390045  | 0.266 | 1.0000 | outlier |
| s25195.1         | 25 | 7392689   | 0.266 | 0.9995 | outlier |
| OAR10_40212146.1 | 10 | 39393584  | 0.266 | 1.0000 | outlier |
| OAR26_46921474.1 | 26 | 41364432  | 0.265 | 0.9995 | outlier |
| OAR11_34161931.1 | 11 | 32011837  | 0.265 | 1.0000 | outlier |
| s51112.1         | 2  | 81758958  | 0.265 | 0.9995 | outlier |
| OAR13_51387503.1 | 13 | 48147260  | 0.265 | 0.9994 | outlier |
| OAR16_26006299.1 | 16 | 23950271  | 0.265 | 1.0000 | outlier |
| OAR2_144002704.1 | 2  | 135391568 | 0.265 | 1.0000 | outlier |
| OAR3_43377195.1  | 3  | 40534487  | 0.264 | 0.9995 | outlier |
| s32596.1         | 19 | 45555962  | 0.264 | 1.0000 | outlier |
| OAR21_27900981.1 | 21 | 25011236  | 0.264 | 1.0000 | outlier |
| OAR4_80559387.1  | 4  | 75968047  | 0.264 | 1.0000 | outlier |
| OAR3_43171845.1  | 3  | 40325396  | 0.264 | 0.9987 | -       |
| OAR10_28149069.1 | 10 | 28136160  | 0.264 | 0.9995 | outlier |
| s24197.1         | 13 | 27210961  | 0.264 | 1.0000 | outlier |
| s28647.1         | 10 | 36317262  | 0.264 | 1.0000 | outlier |
| OAR3_43700480.1  | 3  | 40849521  | 0.264 | 1.0000 | outlier |
| s25289.1         | 4  | 68802676  | 0.264 | 1.0000 | outlier |
| OAR3_152693749.1 | 3  | 142848742 | 0.263 | 1.0000 | outlier |
| s29343.1         | 9  | 4852716   | 0.263 | 0.9993 | outlier |
| s54635.1         | 3  | 214112448 | 0.263 | 1.0000 | outlier |
| OAR2_173495274.1 | 2  | 163845372 | 0.262 | 0.9987 | -       |
| OAR4_75404695.1  | 4  | 71208809  | 0.262 | 1.0000 | outlier |
| OAR7_61660987.1  | 7  | 55726352  | 0.262 | 0.9991 | outlier |
| s21657.1         | 2  | 246962852 | 0.262 | 1.0000 | outlier |
| OAR6_40370293.1  | 6  | 36155169  | 0.262 | 1.0000 | outlier |
| OAR3_138331159.1 | 3  | 129685397 | 0.262 | 0.9987 | -       |
| OAR6_32950084.1  | 6  | 29117330  | 0.261 | 1.0000 | outlier |
| OAR10_18055683.1 | 10 | 18944666  | 0.261 | 1.0000 | outlier |
| OAR13_61547978.1 | 13 | 56574141  | 0.261 | 1.0000 | outlier |
| OAR22_30850267.1 | 22 | 26517035  | 0.261 | 0.9989 | outlier |
| s33957.1         | 11 | 41563065  | 0.261 | 0.9997 | outlier |
| s32677.1         | 19 | 31833784  | 0.261 | 0.9995 | outlier |

|                  |    |           |       |        |         |
|------------------|----|-----------|-------|--------|---------|
| OAR3_33093517.1  | 3  | 30928786  | 0.261 | 0.9987 | -       |
| s34722.1         | 1  | 119491972 | 0.261 | 0.9999 | outlier |
| OAR3_99622529.1  | 3  | 93811641  | 0.261 | 0.9999 | outlier |
| s28038.1         | 20 | 18995856  | 0.261 | 0.9998 | outlier |
| s51433.1         | 17 | 12876687  | 0.261 | 1.0000 | outlier |
| DU397126_450.1   | 14 | 38330512  | 0.260 | 0.9989 | outlier |
| s58695.1         | 16 | 11807075  | 0.260 | 1.0000 | outlier |
| OAR17_33260430.1 | 17 | 30423316  | 0.260 | 0.9999 | outlier |
| OAR2_63781435.1  | 2  | 59306755  | 0.260 | 0.9995 | outlier |
| OAR13_36256194.1 | 13 | 32901567  | 0.260 | 0.9995 | outlier |
| OAR21_45614480.1 | 21 | 41348152  | 0.260 | 1.0000 | outlier |
| OAR23_42222982.1 | 23 | 39828270  | 0.259 | 0.9994 | outlier |
| OAR6_20705814.1  | 6  | 17771785  | 0.259 | 1.0000 | outlier |
| OAR17_31102067.1 | 17 | 28339250  | 0.259 | 1.0000 | outlier |
| DU184544_326.1   | 3  | 108058182 | 0.259 | 1.0000 | outlier |
| OAR3_109226159.1 | 3  | 102833573 | 0.259 | 1.0000 | outlier |
| OAR10_28665836.1 | 10 | 28653747  | 0.259 | 1.0000 | outlier |
| OAR5_99220435.1  | 5  | 90991529  | 0.259 | 1.0000 | outlier |
| OAR7_63814443.1  | 7  | 57875478  | 0.258 | 0.9991 | outlier |
| OAR14_46482530.1 | 14 | 44143535  | 0.258 | 0.9991 | outlier |
| s43948.1         | 14 | 10834307  | 0.257 | 1.0000 | outlier |
| OAR13_89056619.1 | 13 | 83051083  | 0.257 | 1.0000 | outlier |
| OAR13_89063022.1 | 13 | 83057828  | 0.257 | 1.0000 | outlier |
| s10721.1         | 4  | 94145887  | 0.257 | 1.0000 | outlier |
| s42703.1         | 25 | 17652415  | 0.256 | 0.9998 | outlier |
| OAR2_77016276.1  | 2  | 72254024  | 0.256 | 0.9998 | outlier |
| OAR3_136865536.1 | 3  | 128287542 | 0.256 | 0.9997 | outlier |
| s07518.1         | 5  | 58793978  | 0.256 | 1.0000 | outlier |
| s70839.1         | 3  | 186368226 | 0.256 | 1.0000 | outlier |
| OAR10_18125946.1 | 10 | 19014824  | 0.256 | 1.0000 | outlier |
| DU464218_590.1   | 1  | 183575060 | 0.255 | 0.9986 | -       |
| s57846.1         | 5  | 58686175  | 0.255 | 1.0000 | outlier |
| OAR1_207918006.1 | 3  | 178229618 | 0.254 | 1.0000 | outlier |
| s12781.1         | 11 | 34852341  | 0.254 | 1.0000 | outlier |
| OAR7_63960135.1  | 7  | 58027024  | 0.254 | 0.9997 | outlier |
| OAR1_192706983.1 | 1  | 178722562 | 0.254 | 1.0000 | outlier |
| OAR2_19500065.1  | 2  | 19163821  | 0.254 | 1.0000 | outlier |
| OAR22_43788746.1 | 22 | 38880694  | 0.253 | 1.0000 | outlier |
| s24740.1         | 2  | 110941391 | 0.253 | 0.9991 | outlier |
| OAR21_30735369.1 | 21 | 27416751  | 0.253 | 0.9984 | -       |
| OAR15_53192586.1 | 15 | 48728528  | 0.253 | 0.9997 | outlier |
| OAR15_58554489.1 | 15 | 53412021  | 0.253 | 0.9997 | outlier |
| OAR13_36472387.1 | 13 | 33104912  | 0.252 | 1.0000 | outlier |
| s42597.1         | 3  | 93819638  | 0.252 | 1.0000 | outlier |

|                  |    |           |       |        |         |
|------------------|----|-----------|-------|--------|---------|
| OAR3_200394051.1 | 3  | 186159798 | 0.252 | 0.9993 | outlier |
| OAR17_31280438.1 | 17 | 28493407  | 0.251 | 0.9989 | outlier |
| OAR8_60076974.1  | 8  | 56100400  | 0.251 | 1.0000 | outlier |
| s61045.1         | 16 | 5199230   | 0.251 | 0.9983 | -       |
| s45377.1         | 22 | 45373699  | 0.251 | 1.0000 | outlier |
| OAR10_40339520.1 | 10 | 39489315  | 0.251 | 1.0000 | outlier |
| s29567.1         | 5  | 16203101  | 0.251 | 1.0000 | outlier |
| s45399.1         | 13 | 34613483  | 0.251 | 1.0000 | outlier |
| s35979.1         | 11 | 61719571  | 0.250 | 1.0000 | outlier |
| OAR16_33435828.1 | 16 | 30720540  | 0.250 | 0.9999 | outlier |
| OAR2_34497203.1  | 2  | 33138364  | 0.250 | 1.0000 | outlier |
| OAR15_14742464.1 | 15 | 14639505  | 0.250 | 0.9993 | outlier |
| OAR4_91645832.1  | 4  | 86244865  | 0.250 | 0.9989 | outlier |
| OAR4_96284619.1  | 4  | 90707634  | 0.250 | 0.9990 | outlier |
| OAR7_63434047.1  | 7  | 57444290  | 0.249 | 0.9989 | outlier |
| OAR19_46690670.1 | 19 | 44350807  | 0.249 | 0.9995 | outlier |
| OAR3_120497798.1 | 3  | 113038732 | 0.249 | 0.9983 | -       |
| OAR3_141586525.1 | 3  | 132478420 | 0.249 | 1.0000 | outlier |
| OAR23_9959034.1  | 23 | 9048593   | 0.249 | 0.9993 | outlier |
| OAR14_39926553.1 | 14 | 38342841  | 0.248 | 0.9983 | -       |
| OAR1_223448974.1 | 1  | 206911610 | 0.248 | 1.0000 | outlier |
| s44712.1         | 2  | 135753568 | 0.248 | 0.9993 | outlier |
| OAR14_39834952.1 | 14 | 38250883  | 0.248 | 1.0000 | outlier |
| s62522.1         | 16 | 13129166  | 0.248 | 0.9999 | outlier |
| OAR16_15286536.1 | 16 | 14040007  | 0.248 | 1.0000 | outlier |
| OAR1_278191481.1 | 1  | 257412265 | 0.247 | 0.9995 | outlier |
| OAR16_42321024.1 | 16 | 38952447  | 0.247 | 0.9995 | outlier |
| s67284.1         | 25 | 40426700  | 0.247 | 0.9995 | outlier |
| s69776.1         | 2  | 31564277  | 0.247 | 0.9987 | -       |
| OAR13_51886803.1 | 13 | 48657027  | 0.247 | 0.9993 | outlier |
| OAR3_200934301.1 | 3  | 186702791 | 0.247 | 0.9993 | outlier |
| OAR7_19928730.1  | 7  | 19115796  | 0.247 | 0.9986 | -       |
| s07899.1         | 5  | 20057438  | 0.247 | 1.0000 | outlier |
| s73962.1         | 3  | 93903353  | 0.247 | 0.9983 | -       |
| s67285.1         | 1  | 185509365 | 0.247 | 1.0000 | outlier |
| s61002.1         | 16 | 17460862  | 0.247 | 0.9997 | outlier |
| OAR1_249572898.1 | 1  | 231602195 | 0.246 | 1.0000 | outlier |
| s08622.1         | 1  | 251795181 | 0.246 | 0.9983 | -       |
| s07605.1         | 22 | 40971277  | 0.246 | 0.9997 | outlier |
| OAR26_16139285.1 | 26 | 13333552  | 0.246 | 0.9993 | outlier |
| OAR23_27062541.1 | 23 | 25919106  | 0.246 | 0.9986 | -       |
| OAR11_9228448.1  | 11 | 9643793   | 0.246 | 0.9996 | outlier |
| s62564.1         | 18 | 19399095  | 0.246 | 0.9997 | outlier |
| OAR7_62173993.1  | 7  | 56184926  | 0.246 | 0.9999 | outlier |

|                    |    |           |       |        |         |
|--------------------|----|-----------|-------|--------|---------|
| OAR13_52092653.1   | 13 | 48832966  | 0.245 | 1.0000 | outlier |
| s13456.1           | 3  | 156283498 | 0.245 | 1.0000 | outlier |
| OAR2_156740619.1   | 2  | 147804448 | 0.245 | 0.9992 | outlier |
| OAR2_12469561.1    | 2  | 13078663  | 0.245 | 0.9987 | -       |
| OAR2_15027825.1    | 2  | 15581003  | 0.245 | 0.9997 | outlier |
| OAR2_172701586.1   | 2  | 163070840 | 0.245 | 0.9997 | outlier |
| OAR15_4302920.1    | 15 | 4912198   | 0.245 | 0.9997 | outlier |
| OAR2_63274739.1    | 2  | 58896602  | 0.245 | 0.9990 | outlier |
| OAR2_176738567_X.1 | 2  | 167096123 | 0.245 | 0.9990 | outlier |
| OAR9_1718056.1     | 9  | 2004658   | 0.245 | 1.0000 | outlier |
| OAR10_87300005.1   | 10 | 79986413  | 0.245 | 1.0000 | outlier |
| s49429.1           | 13 | 48367950  | 0.245 | 1.0000 | outlier |
| OAR3_117760271.1   | 3  | 110513933 | 0.244 | 0.9979 | -       |
| OAR6_125621422.1   | 6  | 110561891 | 0.244 | 1.0000 | outlier |
| s06024.1           | 24 | 34985988  | 0.244 | 0.9997 | outlier |
| s37981.1           | 23 | 46362141  | 0.243 | 1.0000 | outlier |
| s00079.1           | 3  | 93405961  | 0.243 | 0.9997 | outlier |
| s17708.1           | 1  | 53355068  | 0.243 | 0.9980 | -       |
| OAR13_49902903.1   | 13 | 46588897  | 0.243 | 0.9980 | -       |
| s34341.1           | 22 | 48601164  | 0.243 | 1.0000 | outlier |
| s40624.1           | 25 | 42786734  | 0.243 | 1.0000 | outlier |
| OAR2_40373894.1    | 2  | 38795830  | 0.243 | 0.9990 | outlier |
| OAR6_40780034.1    | 6  | 36572809  | 0.243 | 0.9990 | outlier |
| s26670.1           | 12 | 43278320  | 0.242 | 1.0000 | outlier |
| OAR3_187883913.1   | 3  | 175057434 | 0.242 | 0.9984 | -       |
| s53334.1           | 24 | 12952274  | 0.242 | 1.0000 | outlier |
| s01434.1           | 1  | 261647336 | 0.242 | 0.9982 | -       |

---

**Table S3. A total of 2001 SNPs which were within the top 5% of XPEHH value distribution**

| SNP-ID            | Chromosome | Position | XPEHH value |
|-------------------|------------|----------|-------------|
| OAR3_42907435.1   | 3          | 40163832 | 1.828       |
| OAR3_43377195.1   | 3          | 40534487 | 1.806       |
| OAR3_42933940.1   | 3          | 40191001 | 1.794       |
| OAR3_43472281.1   | 3          | 40625901 | 1.747       |
| OAR3_43027143.1   | 3          | 40285089 | 1.741       |
| OAR3_43427639.1   | 3          | 40586679 | 1.734       |
| s51799.1          | 3          | 40441564 | 1.733       |
| OAR3_43272838.1   | 3          | 40433789 | 1.725       |
| OAR3_43504420.1   | 3          | 40657958 | 1.716       |
| OAR3_42867624.1   | 3          | 40124759 | 1.716       |
| OAR3_43559179_X.1 | 3          | 40713016 | 1.703       |
| OAR3_43171845.1   | 3          | 40325396 | 1.692       |
| OAR3_43209409.1   | 3          | 40363793 | 1.683       |
| OAR3_43013103.1   | 3          | 40270213 | 1.645       |
| OAR3_42729807.1   | 3          | 39986491 | 1.618       |
| OAR3_43700480.1   | 3          | 40849521 | 1.594       |
| OAR3_43337281.1   | 3          | 40496764 | 1.592       |
| s53921.1          | 3          | 40294935 | 1.533       |
| s72091.1          | 3          | 40781801 | 1.525       |
| s73275.1          | 8          | 83688530 | 1.524       |
| OAR3_43596712.1   | 3          | 40751920 | 1.513       |
| OAR3_42672294.1   | 3          | 39927660 | 1.400       |
| OAR3_43708684.1   | 3          | 40855577 | 1.347       |
| OAR3_43766277.1   | 3          | 40909842 | 1.338       |
| OAR3_43667754.1   | 3          | 40815230 | 1.318       |
| s05744.1          | 3          | 40080488 | 1.310       |
| s52712.1          | 8          | 83700844 | 1.304       |
| OAR9_82620139.1   | 9          | 77910235 | 1.252       |
| OAR15_88156831.1  | 15         | 79062902 | 1.237       |
| OAR3_43889039.1   | 3          | 41032031 | 1.226       |
| OAR3_43817056.1   | 3          | 40956953 | 1.218       |
| s14846.1          | 3          | 40924473 | 1.217       |
| s07332.1          | 5          | 16209393 | 1.217       |
| s67679.1          | 5          | 16017146 | 1.212       |
| s08514.1          | 3          | 39851694 | 1.185       |
| s05406.1          | 9          | 77975261 | 1.176       |
| s29567.1          | 5          | 16203101 | 1.175       |
| OAR9_82999383.1   | 9          | 78316151 | 1.157       |
| OAR15_88030300.1  | 15         | 79137075 | 1.144       |
| s52216.1          | 15         | 79041638 | 1.115       |
| OAR3_43871305.1   | 3          | 41015313 | 1.109       |

|                    |    |           |       |
|--------------------|----|-----------|-------|
| OAR9_82575979.1    | 9  | 77866279  | 1.095 |
| s73060.1           | 5  | 15965474  | 1.070 |
| OAR13_36430806.1   | 13 | 33070770  | 1.069 |
| OAR13_36472387.1   | 13 | 33104912  | 1.056 |
| s36433.1           | 9  | 88690261  | 1.053 |
| s36383.1           | 5  | 16420605  | 1.051 |
| OAR9_82968223.1    | 9  | 78287508  | 1.050 |
| s66343.1           | 5  | 15919654  | 1.032 |
| OAR10_87933952.1   | 10 | 80581510  | 1.027 |
| s46524.1           | 5  | 16220530  | 1.025 |
| OAR15_88007876.1   | 15 | 79112023  | 1.018 |
| s42629.1           | 13 | 81009243  | 1.005 |
| OAR5_19010560.1    | 5  | 16550749  | 1.005 |
| s62871.1           | 5  | 16348376  | 0.998 |
| OAR3_42638679.1    | 3  | 39896772  | 0.993 |
| s56138.1           | 8  | 83793039  | 0.985 |
| s10853.1           | 5  | 16080027  | 0.983 |
| OAR15_87133589.1   | 15 | 78508620  | 0.962 |
| OAR3_117652254.1   | 3  | 110467014 | 0.960 |
| OAR1_197916874.1   | 1  | 183420073 | 0.960 |
| OAR10_86238973.1   | 10 | 79062231  | 0.957 |
| OAR10_90473709.1   | 10 | 82888777  | 0.951 |
| OAR3_117760271.1   | 3  | 110513933 | 0.935 |
| s42422.1           | 17 | 61154285  | 0.932 |
| s49833.1           | 15 | 13484995  | 0.927 |
| OAR15_76452305.1   | 15 | 70545475  | 0.913 |
| OAR14_68402170.1   | 14 | 61871888  | 0.910 |
| OAR17_68457670.1   | 17 | 62847208  | 0.904 |
| OAR13_38704338.1   | 13 | 35304376  | 0.903 |
| s30590.1           | 1  | 183676068 | 0.902 |
| OAR18_59577534.1   | 18 | 55762626  | 0.900 |
| s05690.1           | 5  | 16154097  | 0.898 |
| OAR13_81471049.1   | 13 | 75639489  | 0.896 |
| OAR1_197887718.1   | 1  | 183403105 | 0.894 |
| OAR1_198163788.1   | 1  | 183602489 | 0.893 |
| OAR13_36331465.1   | 13 | 32978582  | 0.890 |
| OAR9_84029059.1    | 9  | 79329327  | 0.890 |
| OAR3_117808530.1   | 3  | 110553987 | 0.886 |
| DU462820_330.1     | 13 | 75619811  | 0.885 |
| OAR15_87767502.1   | 15 | 79011094  | 0.884 |
| OAR15_70943760.1   | 15 | 65539039  | 0.883 |
| OAR1_198260896_X.1 | 1  | 183699643 | 0.875 |
| OAR15_76419512.1   | 15 | 70507717  | 0.875 |
| OAR10_87894196.1   | 10 | 80545891  | 0.875 |

|                    |    |           |       |
|--------------------|----|-----------|-------|
| s38680.1           | 5  | 16520048  | 0.874 |
| OAR13_38680856.1   | 13 | 35275288  | 0.870 |
| OAR3_117626019.1   | 3  | 110431071 | 0.870 |
| s50822.1           | 15 | 74721692  | 0.867 |
| OAR10_90517623.1   | 10 | 82933307  | 0.864 |
| DU464218_590.1     | 1  | 183575060 | 0.859 |
| OAR7_53827294.1    | 7  | 48729602  | 0.857 |
| s62462.1           | 5  | 16684125  | 0.855 |
| s09288.1           | 1  | 183640650 | 0.855 |
| s71442.1           | 10 | 82994149  | 0.855 |
| OAR17_68394746.1   | 17 | 62776465  | 0.854 |
| s53371.1           | 10 | 74752408  | 0.853 |
| OAR17_33260430.1   | 17 | 30423316  | 0.853 |
| OAR3_117858874.1   | 3  | 110608833 | 0.850 |
| s40432.1           | 14 | 56451397  | 0.847 |
| OAR9_94123682.1    | 9  | 88593992  | 0.846 |
| s70525.1           | 10 | 79035505  | 0.843 |
| s51450.1           | 17 | 62916211  | 0.841 |
| s47499.1           | 10 | 84137492  | 0.841 |
| s49282.1           | 5  | 16600058  | 0.832 |
| s58402.1           | 15 | 78563409  | 0.831 |
| OAR13_36256194.1   | 13 | 32901567  | 0.830 |
| OAR22_45509727.1   | 22 | 40482146  | 0.829 |
| s19862.1           | 15 | 74618189  | 0.828 |
| OAR10_82059174.1   | 10 | 74893559  | 0.825 |
| OAR1_245994598.1   | 1  | 228281615 | 0.822 |
| OAR3_118131192.1   | 3  | 110878376 | 0.822 |
| OAR13_38906100.1   | 13 | 35507432  | 0.817 |
| OAR1_198428172.1   | 1  | 183846854 | 0.817 |
| s35627.1           | 1  | 183787553 | 0.815 |
| OAR5_87409839_X.1  | 5  | 79542631  | 0.814 |
| s55347.1           | 1  | 183336939 | 0.813 |
| OAR15_13425521.1   | 15 | 13417873  | 0.810 |
| OAR3_118053045.1   | 3  | 110800161 | 0.810 |
| OAR4_10748026.1    | 4  | 10609123  | 0.809 |
| OAR17_68386597.1   | 17 | 62768834  | 0.809 |
| OAR3_118148991.1   | 3  | 110894443 | 0.809 |
| s56494.1           | 5  | 16378679  | 0.809 |
| s10018.1           | 1  | 228225992 | 0.808 |
| OAR1_245956292_X.1 | 1  | 228249737 | 0.808 |
| OAR1_198322856.1   | 1  | 183743001 | 0.807 |
| OAR3_118084612.1   | 3  | 110828511 | 0.805 |
| OAR1_198090603.1   | 1  | 183530032 | 0.803 |
| OAR23_9974468.1    | 23 | 9065236   | 0.802 |



|                   |    |           |       |
|-------------------|----|-----------|-------|
| OAR1_198449920.1  | 1  | 183874319 | 0.802 |
| s73818.1          | 14 | 56425593  | 0.800 |
| OAR15_87249598.1  | 15 | 78626657  | 0.796 |
| OAR14_27453017.1  | 14 | 26280146  | 0.796 |
| s47327.1          | 13 | 55517015  | 0.796 |
| OAR8_82107007.1   | 8  | 76065213  | 0.795 |
| s54635.1          | 3  | 214112448 | 0.793 |
| s67655.1          | 15 | 74641941  | 0.792 |
| OAR14_27438486.1  | 14 | 26265288  | 0.792 |
| OAR4_80605717.1   | 4  | 76007878  | 0.791 |
| OAR9_94172968.1   | 9  | 88641698  | 0.786 |
| s30457.1          | 1  | 183459924 | 0.786 |
| OAR6_44801570.1   | 6  | 40113551  | 0.785 |
| s04032.1          | 9  | 88661518  | 0.785 |
| s07843.1          | 9  | 78510584  | 0.784 |
| s64674.1          | 8  | 76588334  | 0.783 |
| OAR15_80559047.1  | 15 | 74347537  | 0.782 |
| OAR3_89830043.1   | 3  | 84882586  | 0.781 |
| s00079.1          | 3  | 93405961  | 0.781 |
| OAR10_86176235.1  | 10 | 78950748  | 0.780 |
| OAR15_81031438.1  | 15 | 74735737  | 0.777 |
| OAR3_117843556.1  | 3  | 110589829 | 0.777 |
| OAR14_27342805.1  | 14 | 26174255  | 0.777 |
| OAR14_27356556.1  | 14 | 26186832  | 0.777 |
| OAR13_87444196.1  | 13 | 81364321  | 0.774 |
| s00941.1          | 15 | 74636302  | 0.773 |
| OAR7_47161420.1   | 7  | 42551974  | 0.772 |
| s74549.1          | 19 | 29047903  | 0.771 |
| OAR2_61008309.1   | 2  | 56714900  | 0.771 |
| OAR4_10761398_X.1 | 4  | 10623464  | 0.770 |
| s66058.1          | 9  | 32100676  | 0.769 |
| OAR3_89811036.1   | 3  | 84864209  | 0.768 |
| OAR10_12172332.1  | 10 | 13605338  | 0.768 |
| OAR15_80591359.1  | 15 | 74380848  | 0.768 |
| OAR5_87470215.1   | 5  | 79603510  | 0.766 |
| s20638.1          | 5  | 16618176  | 0.764 |
| OAR18_62455560.1  | 18 | 58445827  | 0.762 |
| OAR8_81217085.1   | 8  | 75305198  | 0.762 |
| s49955.1          | 3  | 93554720  | 0.762 |
| OAR8_90425834.1   | 8  | 83842627  | 0.762 |
| OAR4_91329005.1   | 4  | 85930010  | 0.761 |
| OAR13_81364186.1  | 13 | 75530926  | 0.760 |
| OAR13_87230941.1  | 13 | 81137021  | 0.760 |
| s25024.1          | 17 | 61092263  | 0.759 |

|                    |    |           |       |
|--------------------|----|-----------|-------|
| s56763.1           | 5  | 15912332  | 0.759 |
| OAR15_80994401.1   | 15 | 74700420  | 0.759 |
| OAR9_82702203.1    | 9  | 77991830  | 0.758 |
| OAR9_82953999.1    | 9  | 78269811  | 0.757 |
| OAR9_83994635.1    | 9  | 79292813  | 0.757 |
| OAR14_27463865.1   | 14 | 26293894  | 0.757 |
| OAR10_12146157.1   | 10 | 13579925  | 0.756 |
| s16333.1           | 13 | 66077976  | 0.756 |
| OAR3_127956387_X.1 | 3  | 120178240 | 0.756 |
| OAR9_6883350.1     | 9  | 7021673   | 0.756 |
| OAR16_33435828.1   | 16 | 30720540  | 0.755 |
| OAR6_64832803.1    | 6  | 58850066  | 0.755 |
| s55067.1           | 3  | 213928939 | 0.755 |
| OAR15_76595841.1   | 15 | 70691131  | 0.754 |
| OAR3_98710538.1    | 3  | 93004742  | 0.752 |
| OAR3_117907362.1   | 3  | 110649847 | 0.751 |
| OAR20_50695807.1   | 20 | 46597682  | 0.750 |
| OAR15_70998725.1   | 15 | 65593216  | 0.748 |
| OAR8_22222478.1    | 8  | 19757414  | 0.747 |
| OAR9_82428531.1    | 9  | 77756891  | 0.745 |
| s67952.1           | 3  | 93522006  | 0.743 |
| OAR2_60972128.1    | 2  | 56679411  | 0.740 |
| OAR13_39005670.1   | 13 | 35610109  | 0.738 |
| s27778.1           | 10 | 76069138  | 0.738 |
| s67744.1           | 10 | 84100127  | 0.738 |
| OAR3_117968696.1   | 3  | 110722632 | 0.737 |
| DU231119_249.1     | 9  | 7004850   | 0.737 |
| OAR1_245881272.1   | 1  | 228182650 | 0.735 |
| OAR16_42321024.1   | 16 | 38952447  | 0.735 |
| OAR8_22391216.1    | 8  | 19808188  | 0.735 |
| OAR8_84976102.1    | 8  | 78812357  | 0.733 |
| OAR3_127924329_X.1 | 3  | 120136049 | 0.732 |
| OAR13_87268558.1   | 13 | 81176490  | 0.731 |
| OAR9_94310472.1    | 9  | 88775547  | 0.731 |
| OAR8_58028748.1    | 8  | 54142002  | 0.730 |
| OAR7_53759993.1    | 7  | 48695180  | 0.730 |
| OAR5_64796936.1    | 5  | 58959691  | 0.730 |
| OAR9_82309015.1    | 9  | 77648954  | 0.729 |
| OAR6_64965984.1    | 6  | 58974752  | 0.729 |
| OAR15_78509799.1   | 15 | 72430785  | 0.728 |
| OAR9_82293368.1    | 9  | 77630787  | 0.726 |
| OAR3_117945750.1   | 3  | 110692574 | 0.726 |
| OAR14_68366733.1   | 14 | 61840283  | 0.725 |
| s38745.1           | 3  | 214081723 | 0.724 |

|                   |    |           |       |
|-------------------|----|-----------|-------|
| OAR9_82282148_X.1 | 9  | 77619742  | 0.723 |
| OAR7_53909085.1   | 7  | 48811214  | 0.720 |
| OAR2_65726543.1   | 2  | 61275543  | 0.720 |
| OAR18_59593056.1  | 18 | 55777542  | 0.719 |
| s21089.1          | 17 | 60192558  | 0.718 |
| OAR17_68362876.1  | 17 | 62746209  | 0.717 |
| OAR7_53952286.1   | 7  | 48854441  | 0.717 |
| OAR10_86298190.1  | 10 | 79129227  | 0.716 |
| OAR10_84250273.1  | 10 | 77042069  | 0.715 |
| OAR14_27408870.1  | 14 | 26238454  | 0.715 |
| OAR12_84459237.1  | 12 | 76720048  | 0.715 |
| s18674.1          | 13 | 35248112  | 0.714 |
| OAR3_117600112.1  | 3  | 110405090 | 0.714 |
| OAR4_37225390.1   | 4  | 35004679  | 0.714 |
| OAR10_57242083.1  | 10 | 56100245  | 0.712 |
| OAR10_84310189.1  | 10 | 77101531  | 0.712 |
| s62974.1          | 12 | 69228088  | 0.712 |
| s17550.1          | 7  | 42463209  | 0.711 |
| OAR3_83971441.1   | 3  | 79424414  | 0.711 |
| s45715.1          | 5  | 58992351  | 0.710 |
| s70599.1          | 15 | 73730180  | 0.710 |
| OAR10_91895029.1  | 10 | 84261836  | 0.709 |
| s01733.1          | 19 | 29068797  | 0.709 |
| OAR15_13465084.1  | 15 | 13456857  | 0.708 |
| s15797.1          | 3  | 110770412 | 0.707 |
| OAR15_76379434.1  | 15 | 70452674  | 0.705 |
| s46185.1          | 13 | 78420224  | 0.705 |
| s38430.1          | 12 | 75200203  | 0.703 |
| s16840.1          | 5  | 59000838  | 0.703 |
| OAR8_51076568.1   | 8  | 47596948  | 0.703 |
| OAR4_25295648.1   | 4  | 24132337  | 0.702 |
| OAR4_11378770.1   | 4  | 11236528  | 0.701 |
| s40911.1          | 6  | 24065226  | 0.701 |
| s62708.1          | 12 | 76777020  | 0.700 |
| OAR15_13340852.1  | 15 | 13332149  | 0.700 |
| OAR8_81299856.1   | 8  | 75379150  | 0.699 |
| OAR8_22199299_X.1 | 8  | 19734405  | 0.699 |
| s06150.1          | 2  | 244899259 | 0.699 |
| OAR14_68472862.1  | 14 | 61901925  | 0.697 |
| OAR9_1718056.1    | 9  | 2004658   | 0.697 |
| OAR15_13536503.1  | 15 | 13528595  | 0.697 |
| OAR13_87564322.1  | 13 | 81422743  | 0.697 |
| OAR1_198462100.1  | 1  | 183887136 | 0.697 |
| OAR9_6943231.1    | 9  | 7080616   | 0.696 |

|                    |    |           |       |
|--------------------|----|-----------|-------|
| s13821.1           | 5  | 59203793  | 0.694 |
| s19512.1           | 3  | 76037302  | 0.694 |
| OAR17_68309863.1   | 17 | 62688843  | 0.694 |
| OAR13_38886449.1   | 13 | 35490974  | 0.694 |
| OAR3_82409790.1    | 3  | 77879156  | 0.693 |
| s49508.1           | 18 | 58463660  | 0.693 |
| OAR3_118209937.1   | 3  | 110955269 | 0.693 |
| OAR3_232015599.1   | 3  | 214046599 | 0.691 |
| OAR11_32450209.1   | 11 | 30567032  | 0.691 |
| OAR8_84987023.1    | 8  | 78814972  | 0.690 |
| OAR3_43953410.1    | 3  | 41095357  | 0.690 |
| OAR25_19253472_X.1 | 25 | 18533982  | 0.690 |
| s22433.1           | 9  | 82762868  | 0.689 |
| s42597.1           | 3  | 93819638  | 0.689 |
| OAR14_68319489.1   | 14 | 61794245  | 0.688 |
| s67424.1           | 3  | 84822891  | 0.688 |
| OAR4_73786063.1    | 4  | 69811362  | 0.688 |
| OAR1_198064156.1   | 1  | 183513051 | 0.687 |
| s01719.1           | 7  | 48685941  | 0.687 |
| s62083.1           | 13 | 36011422  | 0.686 |
| s38320.1           | 8  | 51842542  | 0.686 |
| OAR3_79159004.1    | 3  | 74929284  | 0.684 |
| s75876.1           | 21 | 42601748  | 0.684 |
| s70532.1           | 5  | 58917824  | 0.683 |
| OAR9_33735501_X.1  | 9  | 32212468  | 0.682 |
| s02448.1           | 22 | 40450104  | 0.682 |
| s34861.1           | 5  | 79693742  | 0.681 |
| OAR21_46682445.1   | 21 | 42300786  | 0.681 |
| s03078.1           | 13 | 33058560  | 0.681 |
| OAR18_59519283.1   | 18 | 55698328  | 0.680 |
| OAR7_18503023.1    | 7  | 17777251  | 0.679 |
| OAR3_190383205.1   | 3  | 177408460 | 0.678 |
| s35258.1           | 3  | 217238883 | 0.677 |
| s14938.1           | 9  | 795580    | 0.677 |
| s72653.1           | 15 | 31723078  | 0.676 |
| OAR3_79206128.1    | 3  | 74982457  | 0.676 |
| OAR9_33777151.1    | 9  | 32258653  | 0.676 |
| OAR8_60234503.1    | 8  | 56216655  | 0.676 |
| OAR15_33211632.1   | 15 | 31683921  | 0.676 |
| s42116.1           | 13 | 81454801  | 0.676 |
| OAR12_84767663.1   | 12 | 76845918  | 0.675 |
| s14087.1           | 3  | 93271832  | 0.674 |
| OAR6_65100822.1    | 6  | 59116808  | 0.674 |
| s57260.1           | 6  | 40223479  | 0.674 |

|                    |    |           |       |
|--------------------|----|-----------|-------|
| OAR21_34333027.1   | 21 | 30751827  | 0.674 |
| OAR11_18625918.1   | 11 | 18255835  | 0.673 |
| OAR7_53985984.1    | 7  | 48887292  | 0.673 |
| OAR13_36318213.1   | 13 | 32965686  | 0.672 |
| s00653.1           | 1  | 231652278 | 0.672 |
| OAR9_82178363.1    | 9  | 77571488  | 0.672 |
| OAR19_33593848.1   | 19 | 31915771  | 0.671 |
| s61765.1           | 18 | 60674746  | 0.670 |
| OAR12_42565904.1   | 12 | 38201807  | 0.670 |
| s50307.1           | 24 | 7721963   | 0.668 |
| OAR4_11392839.1    | 4  | 11250213  | 0.667 |
| OAR1_107287431.1   | 1  | 99972078  | 0.667 |
| OAR4_93067608.1    | 4  | 87649810  | 0.667 |
| s34694.1           | 2  | 244814221 | 0.666 |
| OAR17_33279012.1   | 17 | 30441923  | 0.666 |
| OAR3_84033269.1    | 3  | 79473981  | 0.666 |
| s03253.1           | 24 | 7615311   | 0.665 |
| s43578.1           | 3  | 213806251 | 0.664 |
| OAR4_80559387.1    | 4  | 75968047  | 0.663 |
| OAR8_84946107.1    | 8  | 78766776  | 0.663 |
| OAR15_33293466_X.1 | 15 | 31763433  | 0.663 |
| OAR16_27229721.1   | 16 | 25021431  | 0.662 |
| s02743.1           | 14 | 56495857  | 0.662 |
| OAR9_1734865.1     | 9  | 1988218   | 0.661 |
| OAR8_91701722.1    | 8  | 85040138  | 0.660 |
| OAR21_46936641.1   | 21 | 42442018  | 0.659 |
| s07697.1           | 12 | 38391949  | 0.659 |
| OAR9_82171170.1    | 9  | 77563420  | 0.658 |
| OAR2_141478977_X.1 | 2  | 132967710 | 0.658 |
| OAR4_83374739.1    | 4  | 78627494  | 0.658 |
| OAR1_206552578.1   | 1  | 191356092 | 0.658 |
| OAR12_67663336.1   | 12 | 61208417  | 0.657 |
| OAR3_84111819.1    | 3  | 79547932  | 0.657 |
| OAR3_99622529.1    | 3  | 93811641  | 0.655 |
| OAR3_82349536.1    | 3  | 77817377  | 0.655 |
| OAR3_231922518.1   | 3  | 213955526 | 0.654 |
| OAR4_80633497.1    | 4  | 76037014  | 0.654 |
| s64982.1           | 3  | 93725974  | 0.654 |
| s09178.1           | 3  | 93330223  | 0.653 |
| OAR8_56047895.1    | 8  | 52121715  | 0.652 |
| OAR19_33417302.1   | 19 | 31737627  | 0.651 |
| OAR3_84073899.1    | 3  | 79511180  | 0.651 |
| OAR15_22404265.1   | 15 | 21482600  | 0.650 |
| OAR3_152693749.1   | 3  | 142848742 | 0.650 |

|                    |    |           |       |
|--------------------|----|-----------|-------|
| s66575.1           | 4  | 47439380  | 0.650 |
| OAR6_65237136.1    | 6  | 59255622  | 0.649 |
| s08413.1           | 3  | 214006806 | 0.649 |
| OAR3_225655674.1   | 3  | 207999099 | 0.648 |
| OAR5_104164895.1   | 5  | 95711861  | 0.647 |
| s20190.1           | 2  | 244962782 | 0.647 |
| OAR8_55825703.1    | 8  | 51981196  | 0.646 |
| s26777.1           | 3  | 213906966 | 0.645 |
| s37379.1           | 21 | 30761604  | 0.644 |
| OAR15_78019848.1   | 15 | 71981656  | 0.643 |
| s66828.1           | 15 | 65522727  | 0.642 |
| s25926.1           | 13 | 81223444  | 0.642 |
| OAR8_93512767.1    | 8  | 86728596  | 0.641 |
| s32677.1           | 19 | 31833784  | 0.641 |
| s28437.1           | 17 | 62982754  | 0.641 |
| OAR1_81160492.1    | 1  | 75981581  | 0.640 |
| OAR8_91759596.1    | 8  | 85080887  | 0.640 |
| OAR15_32816326.1   | 15 | 31325582  | 0.640 |
| OAR13_87648967.1   | 13 | 81506987  | 0.639 |
| s25636.1           | 17 | 61218530  | 0.639 |
| s33447.1           | 7  | 17324345  | 0.639 |
| s71801.1           | 13 | 35418640  | 0.639 |
| s14434.1           | 13 | 77724530  | 0.638 |
| OAR1_206588453.1   | 1  | 191393205 | 0.638 |
| OAR9_97890623.1    | 9  | 91993061  | 0.637 |
| OAR4_10829975.1    | 4  | 10685933  | 0.637 |
| s10703.1           | 21 | 42434301  | 0.637 |
| OAR4_83356798.1    | 4  | 78611633  | 0.637 |
| s28673.1           | 8  | 80327331  | 0.637 |
| s26313.1           | 3  | 79415127  | 0.637 |
| OAR8_22272619.1    | 8  | 19679596  | 0.635 |
| OAR2_180722401.1   | 2  | 170471855 | 0.634 |
| OAR8_93540310.1    | 8  | 86753491  | 0.634 |
| OAR15_77948911.1   | 15 | 71913377  | 0.634 |
| OAR1_249572898.1   | 1  | 231602195 | 0.634 |
| OAR9_96141857.1    | 9  | 90491974  | 0.634 |
| OAR2_172701586.1   | 2  | 163070840 | 0.634 |
| s01640.1           | 2  | 135178922 | 0.632 |
| OAR8_82139676.1    | 8  | 76094721  | 0.632 |
| s50043.1           | 3  | 217268499 | 0.632 |
| OAR12_72924306.1   | 12 | 66252130  | 0.632 |
| s05273.1           | 16 | 39057236  | 0.631 |
| OAR13_81410207.1   | 13 | 75577565  | 0.631 |
| OAR18_64788162_X.1 | 18 | 60788242  | 0.631 |

|                   |    |           |       |
|-------------------|----|-----------|-------|
| DU310703_497.1    | 12 | 75121332  | 0.631 |
| OAR10_28149069.1  | 10 | 28136160  | 0.631 |
| OAR9_8935577.1    | 9  | 9072827   | 0.630 |
| OAR9_6774170.1    | 9  | 6922921   | 0.630 |
| OAR8_93573717.1   | 8  | 86788358  | 0.629 |
| s43870.1          | 2  | 132934057 | 0.629 |
| OAR17_31561091.1  | 17 | 28790576  | 0.628 |
| OAR19_14489436.1  | 19 | 13918425  | 0.628 |
| OAR2_259002206.1  | 2  | 245049692 | 0.628 |
| s20108.1          | 17 | 65695441  | 0.628 |
| OAR3_190368631.1  | 3  | 177394170 | 0.627 |
| s70619.1          | 16 | 9109431   | 0.626 |
| OAR15_78548290.1  | 15 | 72470215  | 0.626 |
| OAR19_46690670.1  | 19 | 44350807  | 0.625 |
| OAR3_152741614.1  | 3  | 142894678 | 0.625 |
| OAR1_145252178.1  | 1  | 134152602 | 0.625 |
| OAR2_180971216.1  | 2  | 170637499 | 0.625 |
| OAR2_13925483.1   | 2  | 14508559  | 0.625 |
| OAR3_138331159.1  | 3  | 129685397 | 0.624 |
| s11510.1          | 9  | 39402216  | 0.624 |
| OAR25_19329042.1  | 25 | 18624514  | 0.624 |
| OAR4_26645098.1   | 4  | 25358759  | 0.623 |
| OAR1_245847989.1  | 1  | 228160493 | 0.622 |
| OAR6_76407642.1   | 6  | 69901252  | 0.622 |
| s67834.1          | 21 | 42502482  | 0.622 |
| OAR12_42693133.1  | 12 | 38285702  | 0.622 |
| OAR12_42864343.1  | 12 | 38461703  | 0.622 |
| OAR1_245769021.1  | 1  | 228089416 | 0.621 |
| OAR1_245789135.1  | 1  | 228106358 | 0.621 |
| OAR2_165305793.1  | 2  | 155889712 | 0.621 |
| s57541.1          | 10 | 13560775  | 0.621 |
| s13618.1          | 2  | 132868782 | 0.621 |
| OAR9_33070898.1   | 9  | 31552301  | 0.621 |
| s53056.1          | 2  | 40839676  | 0.620 |
| OAR12_76153608.1  | 12 | 69326479  | 0.619 |
| s09462.1          | 3  | 104064729 | 0.619 |
| OAR13_70737254.1  | 13 | 65652628  | 0.619 |
| s18401.1          | 13 | 65660964  | 0.619 |
| OAR8_55643574.1   | 8  | 51778519  | 0.619 |
| OAR6_64875580_X.1 | 6  | 58892237  | 0.618 |
| OAR3_195236801.1  | 3  | 181251741 | 0.618 |
| s39564.1          | 13 | 43797381  | 0.618 |
| s36428.1          | 3  | 25612070  | 0.617 |
| OAR19_33355170.1  | 19 | 31674797  | 0.617 |

|                   |    |           |       |
|-------------------|----|-----------|-------|
| OAR9_8924567.1    | 9  | 9058127   | 0.616 |
| s19461.1          | 22 | 39739539  | 0.616 |
| OAR3_150667114.1  | 3  | 140853334 | 0.616 |
| OAR8_22309726.1   | 8  | 19715836  | 0.615 |
| s59697.1          | 13 | 77685416  | 0.615 |
| OAR16_42448158.1  | 16 | 39077896  | 0.615 |
| s15337.1          | 3  | 143068596 | 0.614 |
| OAR7_18402440.1   | 7  | 17681312  | 0.614 |
| OAR12_42841466.1  | 12 | 38432263  | 0.614 |
| s40856.1          | 11 | 41441937  | 0.613 |
| OAR13_60486404.1  | 13 | 55508708  | 0.613 |
| OAR3_195088663.1  | 3  | 181113434 | 0.613 |
| OAR7_47189570.1   | 7  | 42580713  | 0.612 |
| OAR1_268122939.1  | 1  | 248275678 | 0.612 |
| OAR9_6934929.1    | 9  | 7073202   | 0.612 |
| s35677.1          | 15 | 13579528  | 0.612 |
| OAR2_13939688.1   | 2  | 14523912  | 0.612 |
| OAR2_63283575.1   | 2  | 58905801  | 0.611 |
| OAR4_93263585.1   | 4  | 87830835  | 0.611 |
| OAR8_86488410.1   | 8  | 80247025  | 0.611 |
| s33957.1          | 11 | 41563065  | 0.611 |
| OAR3_80356382_X.1 | 3  | 76052424  | 0.610 |
| s06109.1          | 15 | 74597812  | 0.609 |
| OAR10_87814152.1  | 10 | 80465758  | 0.609 |
| s16659.1          | 13 | 81067937  | 0.609 |
| s10362.1          | 19 | 31777619  | 0.608 |
| s26719.1          | 12 | 69269910  | 0.607 |
| s13370.1          | 1  | 108116540 | 0.607 |
| s21640.1          | 25 | 13152201  | 0.607 |
| OAR4_73842776_X.1 | 4  | 69869475  | 0.607 |
| OAR10_87867275.1  | 10 | 80519356  | 0.606 |
| s72510.1          | 8  | 10725738  | 0.605 |
| s03117.1          | 13 | 77857774  | 0.605 |
| s36316.1          | 2  | 244165892 | 0.605 |
| OAR8_83343787.1   | 8  | 77245074  | 0.605 |
| s12526.1          | 13 | 65479991  | 0.604 |
| OAR13_39447377.1  | 13 | 36045045  | 0.603 |
| OAR7_53438825.1   | 7  | 48378412  | 0.603 |
| s12156.1          | 5  | 59160205  | 0.603 |
| OAR8_89520460.1   | 8  | 83001737  | 0.603 |
| OAR10_50091915.1  | 10 | 49246348  | 0.602 |
| OAR2_42709839.1   | 2  | 40875507  | 0.602 |
| OAR3_190359838.1  | 3  | 177385320 | 0.602 |
| OAR9_8579331.1    | 9  | 8820234   | 0.602 |



|                    |    |           |       |
|--------------------|----|-----------|-------|
| OAR3_125588829.1   | 3  | 117721356 | 0.602 |
| OAR2_141413285.1   | 2  | 132904756 | 0.601 |
| OAR8_12060950.1    | 8  | 10761579  | 0.600 |
| OAR10_82097240_X.1 | 10 | 74924462  | 0.600 |
| OAR1_116830364.1   | 1  | 108001622 | 0.600 |
| OAR15_78164304.1   | 15 | 72091092  | 0.600 |
| OAR4_36981043.1    | 4  | 34937344  | 0.600 |
| DU398082_567.1     | 7  | 48962917  | 0.600 |
| s27142.1           | 16 | 66542249  | 0.599 |
| OAR18_20398726.1   | 18 | 19898256  | 0.599 |
| OAR4_93024080.1    | 4  | 87602738  | 0.599 |
| OAR22_10482614.1   | 22 | 8739841   | 0.599 |
| OAR22_34323192.1   | 22 | 29843623  | 0.599 |
| OAR10_28087786.1   | 10 | 28071590  | 0.598 |
| OAR16_33478147.1   | 16 | 30847022  | 0.598 |
| OAR26_9403466.1    | 26 | 7276882   | 0.598 |
| s11660.1           | 11 | 41465606  | 0.597 |
| s10816.1           | 13 | 68732696  | 0.597 |
| OAR7_47322813.1    | 7  | 42706326  | 0.597 |
| OAR10_29381795.1   | 10 | 29344224  | 0.597 |
| s02782.1           | 12 | 69314979  | 0.597 |
| OAR8_56100402.1    | 8  | 52180896  | 0.597 |
| OAR16_43190112.1   | 16 | 39708223  | 0.597 |
| s01629.1           | 1  | 2721556   | 0.595 |
| s20408.1           | 3  | 213849396 | 0.595 |
| OAR2_60563723.1    | 2  | 56274688  | 0.594 |
| s54502.1           | 11 | 12686482  | 0.594 |
| s61162.1           | 22 | 40552713  | 0.593 |
| OAR8_57964281.1    | 8  | 54076612  | 0.593 |
| OAR4_87332839.1    | 4  | 82212446  | 0.593 |
| OAR19_60184770.1   | 19 | 56634864  | 0.593 |
| OAR5_96790272.1    | 5  | 88746609  | 0.593 |
| OAR8_67149281.1    | 8  | 62355310  | 0.592 |
| OAR10_40627671.1   | 10 | 39816919  | 0.592 |
| OAR2_144002704.1   | 2  | 135391568 | 0.592 |
| OAR1_156816942.1   | 1  | 145279459 | 0.591 |
| OAR2_43037062.1    | 2  | 41162381  | 0.591 |
| OAR17_33357382.1   | 17 | 30468599  | 0.591 |
| OAR7_18423084.1    | 7  | 17701363  | 0.591 |
| OAR18_59003703.1   | 18 | 55210183  | 0.591 |
| s74680.1           | 18 | 59200949  | 0.590 |
| s53519.1           | 18 | 29717895  | 0.590 |
| s16714.1           | 2  | 163140231 | 0.590 |
| OAR3_84348827.1    | 3  | 79772321  | 0.590 |

|                    |    |           |       |
|--------------------|----|-----------|-------|
| OAR19_33525291.1   | 19 | 31850022  | 0.589 |
| OAR5_36644948.1    | 5  | 33090257  | 0.589 |
| OAR2_65914681.1    | 2  | 61456748  | 0.589 |
| OAR22_29183207.1   | 22 | 24858581  | 0.588 |
| OAR8_11551388.1    | 8  | 10368179  | 0.588 |
| OAR6_27400136.1    | 6  | 24006078  | 0.587 |
| OAR16_37539041.1   | 16 | 34550197  | 0.587 |
| s64995.1           | 8  | 75417603  | 0.586 |
| s49373.1           | 20 | 46556750  | 0.586 |
| OAR2_95050543.1    | 2  | 89189237  | 0.586 |
| OAR6_27332730.1    | 6  | 23939264  | 0.585 |
| OAR1_152473283.1   | 1  | 141297942 | 0.585 |
| OAR3_110555269_X.1 | 3  | 104173689 | 0.585 |
| OAR16_44102697.1   | 16 | 40583350  | 0.585 |
| OAR10_29341212.1   | 10 | 29304176  | 0.584 |
| s42960.1           | 3  | 213824504 | 0.584 |
| OAR4_80509083.1    | 4  | 75911464  | 0.583 |
| OAR10_49684438.1   | 10 | 48900679  | 0.583 |
| OAR3_84148810.1    | 3  | 79584309  | 0.583 |
| OAR17_67071168.1   | 17 | 61513077  | 0.583 |
| OAR11_12480303.1   | 11 | 12728167  | 0.583 |
| s11336.1           | 4  | 87572495  | 0.583 |
| OAR12_84842455.1   | 12 | 76751672  | 0.583 |
| OAR23_9959034.1    | 23 | 9048593   | 0.583 |
| OAR21_13135613.1   | 21 | 11577229  | 0.582 |
| OAR23_42222982.1   | 23 | 39828270  | 0.582 |
| OAR2_252085914.1   | 2  | 238675170 | 0.582 |
| OAR8_58134022.1    | 8  | 54236077  | 0.581 |
| s29911.1           | 18 | 10929367  | 0.581 |
| s05828.1           | 6  | 12467500  | 0.581 |
| OAR21_34358292.1   | 21 | 30779239  | 0.581 |
| OAR9_41429299.1    | 9  | 39453432  | 0.581 |
| OAR15_33315132.1   | 15 | 31784781  | 0.580 |
| OAR15_13214168.1   | 15 | 13200152  | 0.580 |
| OAR16_33588226.1   | 16 | 30948356  | 0.580 |
| OAR3_195114301.1   | 3  | 181139296 | 0.580 |
| OAR3_44188902.1    | 3  | 41281473  | 0.580 |
| OAR3_118335841.1   | 3  | 111119165 | 0.579 |
| OAR8_56107289.1    | 8  | 52190725  | 0.579 |
| OAR16_33317775.1   | 16 | 30655866  | 0.579 |
| OAR3_196830362.1   | 3  | 182820486 | 0.579 |
| OAR6_65117122.1    | 6  | 59133189  | 0.578 |
| s35395.1           | 15 | 13615819  | 0.578 |
| OAR18_11985596.1   | 18 | 12026856  | 0.578 |

|                   |    |           |       |
|-------------------|----|-----------|-------|
| OAR2_34260595.1   | 2  | 32949467  | 0.578 |
| s49110.1          | 18 | 58474543  | 0.577 |
| OAR1_52460849.1   | 1  | 50316433  | 0.577 |
| s05435.1          | 18 | 60735654  | 0.577 |
| OAR5_104273659.1  | 5  | 95731940  | 0.577 |
| OAR24_42942982.1  | 24 | 39726323  | 0.577 |
| s41580.1          | 2  | 32913281  | 0.577 |
| s44712.1          | 2  | 135753568 | 0.577 |
| OAR15_8329424.1   | 15 | 8616919   | 0.576 |
| OAR7_53702492.1   | 7  | 48639590  | 0.576 |
| OAR17_31784331.1  | 17 | 29015377  | 0.576 |
| OAR16_44166560.1  | 16 | 40650762  | 0.575 |
| OAR5_36627156.1   | 5  | 33071203  | 0.575 |
| OAR8_83390411.1   | 8  | 77284736  | 0.575 |
| s73962.1          | 3  | 93903353  | 0.575 |
| OAR15_76652734.1  | 15 | 70742236  | 0.574 |
| OAR6_55423607.1   | 6  | 50127083  | 0.574 |
| OAR12_42582975.1  | 12 | 38218663  | 0.574 |
| s14577.1          | 7  | 26755264  | 0.574 |
| s61354.1          | 5  | 90586440  | 0.574 |
| s58484.1          | 2  | 165546958 | 0.574 |
| OAR17_65728611.1  | 17 | 60199858  | 0.574 |
| OAR8_55597205.1   | 8  | 51730681  | 0.573 |
| OAR16_42499047.1  | 16 | 39127633  | 0.573 |
| OAR1_181982373.1  | 1  | 168760749 | 0.573 |
| OAR1_117069007.1  | 1  | 108272813 | 0.573 |
| s74362.1          | 3  | 111011549 | 0.573 |
| s10664.1          | 2  | 244129054 | 0.573 |
| s40989.1          | 24 | 33172658  | 0.573 |
| OAR13_70672871.1  | 13 | 65588250  | 0.573 |
| s03142.1          | 3  | 217226491 | 0.573 |
| s56877.1          | 17 | 65662344  | 0.572 |
| OAR3_78052239_X.1 | 3  | 73892462  | 0.572 |
| OAR3_128319473.1  | 3  | 120414509 | 0.572 |
| OAR1_241598383.1  | 1  | 224047352 | 0.572 |
| s70623.1          | 10 | 24789023  | 0.572 |
| OAR2_166515103.1  | 2  | 157090967 | 0.572 |
| OAR8_86639423.1   | 8  | 80390056  | 0.572 |
| OAR3_128369653.1  | 3  | 120461206 | 0.572 |
| OAR15_53721488.1  | 15 | 49215124  | 0.572 |
| OAR4_26579960.1   | 4  | 25292594  | 0.572 |
| s54026.1          | 3  | 151972015 | 0.571 |
| s07047.1          | 20 | 46575517  | 0.571 |
| OAR3_195631696.1  | 3  | 181650708 | 0.571 |

|                   |    |           |       |
|-------------------|----|-----------|-------|
| OAR13_87428154.1  | 13 | 81349148  | 0.571 |
| s65742.1          | 3  | 208052819 | 0.571 |
| s17708.1          | 1  | 53355068  | 0.570 |
| OAR2_68196664.1   | 2  | 63720116  | 0.570 |
| OAR10_29448537.1  | 10 | 29415140  | 0.570 |
| OAR3_16758206.1   | 3  | 15525958  | 0.570 |
| OAR12_75251826.1  | 12 | 68481603  | 0.570 |
| OAR26_40820405.1  | 26 | 35876688  | 0.570 |
| OAR5_94270780.1   | 5  | 86055067  | 0.570 |
| OAR2_146760496.1  | 2  | 138159566 | 0.569 |
| OAR12_63367607.1  | 12 | 56957221  | 0.569 |
| OAR11_3180902.1   | 11 | 3834100   | 0.569 |
| OAR9_9093388.1    | 9  | 9264542   | 0.569 |
| OAR3_89640427.1   | 3  | 84689397  | 0.569 |
| s20727.1          | 16 | 40527757  | 0.569 |
| s60404.1          | 2  | 245007283 | 0.569 |
| OAR7_53659419_X.1 | 7  | 48597074  | 0.568 |
| OAR5_80840861.1   | 5  | 73586339  | 0.568 |
| s19664.1          | 9  | 79378534  | 0.568 |
| OAR26_41000588.1  | 26 | 36074023  | 0.568 |
| DU345394_399.1    | 18 | 60904691  | 0.568 |
| OAR2_23428619.1   | 2  | 23090794  | 0.568 |
| OAR15_28647683.1  | 15 | 27335675  | 0.568 |
| s46664.1          | 3  | 217310965 | 0.567 |
| s65675.1          | 8  | 54187572  | 0.567 |
| OAR15_32800538.1  | 15 | 31309312  | 0.567 |
| s19317.1          | 2  | 238602466 | 0.567 |
| s67284.1          | 25 | 40426700  | 0.566 |
| OAR2_142416977.1  | 2  | 133928107 | 0.566 |
| s21764.1          | 1  | 107955452 | 0.566 |
| OAR3_87830734.1   | 3  | 82884212  | 0.566 |
| OAR5_23712613.1   | 5  | 21070914  | 0.566 |
| OAR1_124203566.1  | 1  | 115232883 | 0.566 |
| s57800.1          | 11 | 47905026  | 0.566 |
| s28575.1          | 21 | 42551316  | 0.565 |
| OAR9_14653377.1   | 9  | 14303907  | 0.565 |
| OAR4_94588384.1   | 4  | 89090017  | 0.565 |
| s24365.1          | 5  | 36459832  | 0.565 |
| s39959.1          | 2  | 244947713 | 0.565 |
| OAR6_43010674.1   | 6  | 38617412  | 0.565 |
| OAR17_25389294.1  | 17 | 22988961  | 0.565 |
| OAR16_33405502.1  | 16 | 30692759  | 0.565 |
| s67702.1          | 13 | 66132902  | 0.565 |
| s69776.1          | 2  | 31564277  | 0.565 |

|                    |    |           |       |
|--------------------|----|-----------|-------|
| OAR1_52636268.1    | 1  | 50494736  | 0.564 |
| OAR3_197060241.1   | 3  | 183051361 | 0.564 |
| OAR2_61130563.1    | 2  | 56840997  | 0.564 |
| s10098.1           | 13 | 77634996  | 0.564 |
| OAR18_20569924.1   | 18 | 20071226  | 0.564 |
| OAR2_48093430.1    | 2  | 45357951  | 0.564 |
| s04347.1           | 1  | 42856505  | 0.564 |
| OAR3_196681113.1   | 3  | 182669294 | 0.564 |
| OAR3_122207054.1   | 3  | 114648138 | 0.563 |
| OAR4_10699994.1    | 4  | 10559577  | 0.563 |
| OAR12_42742443_X.1 | 12 | 38336928  | 0.563 |
| s49449.1           | 8  | 19896747  | 0.563 |
| OAR9_6641948.1     | 9  | 6721696   | 0.563 |
| OAR16_31845248.1   | 16 | 29304504  | 0.563 |
| OAR6_26089154.1    | 6  | 22814552  | 0.562 |
| OAR5_93445511_X.1  | 5  | 85245598  | 0.562 |
| OAR15_79929526.1   | 15 | 73750680  | 0.562 |
| s20320.1           | 2  | 245030239 | 0.562 |
| OAR19_22142283.1   | 19 | 28809608  | 0.562 |
| OAR3_99006940.1    | 3  | 93277829  | 0.561 |
| OAR2_180932811.1   | 2  | 170602376 | 0.561 |
| OAR17_44358460.1   | 17 | 41064820  | 0.561 |
| s56460.1           | 10 | 27645248  | 0.561 |
| OAR7_50099626.1    | 7  | 45368868  | 0.561 |
| s45695.1           | 3  | 4648352   | 0.561 |
| OAR1_145163431.1   | 1  | 134137436 | 0.560 |
| OAR8_62203494_X.1  | 8  | 57876220  | 0.560 |
| OAR4_94538015.1    | 4  | 89040955  | 0.560 |
| s29286.1           | 4  | 117266371 | 0.560 |
| OAR12_28635024.1   | 12 | 25171224  | 0.560 |
| OAR1_107239370.1   | 1  | 99931717  | 0.559 |
| OAR4_10443301.1    | 4  | 10281638  | 0.559 |
| OAR10_86330122.1   | 10 | 79161469  | 0.559 |
| OAR4_83328517.1    | 4  | 78581178  | 0.559 |
| s01421.1           | 3  | 177456644 | 0.559 |
| OAR4_52735300.1    | 4  | 49919893  | 0.558 |
| OAR8_11646058.1    | 8  | 10461730  | 0.558 |
| OAR15_70840858.1   | 15 | 65425993  | 0.558 |
| OAR8_83502542.1    | 8  | 77384602  | 0.558 |
| OAR3_196904777.1   | 3  | 182900674 | 0.557 |
| OAR3_196913312.1   | 3  | 182916410 | 0.557 |
| s67158.1           | 25 | 7727709   | 0.557 |
| s27686.1           | 7  | 49009028  | 0.557 |
| OAR1_206496404.1   | 1  | 191302900 | 0.556 |

|                  |    |           |       |
|------------------|----|-----------|-------|
| s29150.1         | 4  | 117204244 | 0.556 |
| OAR2_91693967.1  | 2  | 86217927  | 0.555 |
| OAR9_96060950.1  | 9  | 90516874  | 0.555 |
| OAR18_64851953.1 | 18 | 60853888  | 0.555 |
| OAR1_52518679.1  | 1  | 50373341  | 0.555 |
| OAR6_42945420.1  | 6  | 38567335  | 0.555 |
| OAR14_57922732.1 | 6  | 38580198  | 0.555 |
| s02472.1         | 20 | 15603841  | 0.554 |
| OAR2_165282874.1 | 2  | 155866494 | 0.554 |
| OAR14_39759149.1 | 14 | 38170832  | 0.554 |
| OAR2_118498709.1 | 2  | 110291246 | 0.554 |
| OAR22_10514814.1 | 22 | 8774021   | 0.553 |
| OAR3_84154568.1  | 3  | 79592460  | 0.553 |
| OAR1_117144883.1 | 1  | 108334841 | 0.553 |
| OAR8_55769107.1  | 8  | 51921694  | 0.553 |
| OAR1_52744886.1  | 1  | 50596811  | 0.552 |
| s66528.1         | 20 | 46649856  | 0.552 |
| s25789.1         | 1  | 50306410  | 0.552 |
| OAR21_48060059.1 | 21 | 43472640  | 0.551 |
| s25030.1         | 9  | 31534631  | 0.551 |
| s52346.1         | 12 | 61401931  | 0.551 |
| OAR3_127882408.1 | 3  | 120095387 | 0.551 |
| OAR13_60423450.1 | 13 | 55558769  | 0.551 |
| s10695.1         | 15 | 27385126  | 0.551 |
| OAR10_24807423.1 | 10 | 24900528  | 0.551 |
| s45296.1         | 10 | 19465704  | 0.551 |
| s30200.1         | 17 | 62654616  | 0.551 |
| OAR6_43104220.1  | 6  | 38706958  | 0.551 |
| s58187.1         | 22 | 16538861  | 0.550 |
| OAR19_48025918.1 | 19 | 45596524  | 0.550 |
| OAR2_245949843.1 | 2  | 232863244 | 0.550 |
| s12587.1         | 3  | 93343121  | 0.550 |
| OAR9_89266462.1  | 9  | 84373507  | 0.550 |
| OAR13_73857254.1 | 13 | 68662488  | 0.549 |
| s12995.1         | 24 | 7667607   | 0.549 |
| OAR3_96268784.1  | 3  | 90654749  | 0.549 |
| s34702.1         | 20 | 46681742  | 0.549 |
| OAR1_246159875.1 | 1  | 228372242 | 0.549 |
| OAR1_52559106.1  | 1  | 50412664  | 0.549 |
| OAR3_125694577.1 | 3  | 117818595 | 0.549 |
| OAR6_15051305.1  | 6  | 12499974  | 0.549 |
| OAR1_214424851.1 | 1  | 198653992 | 0.548 |
| OAR2_43139454.1  | 2  | 41262244  | 0.548 |
| OAR8_22174396.1  | 8  | 19674317  | 0.548 |

|                  |    |           |       |
|------------------|----|-----------|-------|
| OAR11_18815864.1 | 11 | 18433474  | 0.548 |
| OAR8_27416478.1  | 8  | 24996355  | 0.548 |
| s13514.1         | 9  | 32128668  | 0.548 |
| OAR2_147566610.1 | 2  | 138966957 | 0.548 |
| OAR8_57948794.1  | 8  | 54058725  | 0.547 |
| s49062.1         | 18 | 46100361  | 0.547 |
| s27865.1         | 22 | 43220669  | 0.547 |
| OAR18_32289792.1 | 18 | 30930994  | 0.547 |
| OAR9_8904760.1   | 9  | 9039083   | 0.547 |
| OAR10_30205238.1 | 10 | 30157078  | 0.547 |
| OAR16_10200326.1 | 16 | 9251385   | 0.547 |
| s54313.1         | 2  | 13836112  | 0.547 |
| OAR6_64921019.1  | 6  | 58934336  | 0.547 |
| OAR25_19360132.1 | 25 | 18598726  | 0.546 |
| OAR17_64889221.1 | 17 | 59447245  | 0.546 |
| OAR4_107786618.1 | 4  | 101313300 | 0.546 |
| s23170.1         | 11 | 47799943  | 0.546 |
| s62006.1         | 3  | 4401530   | 0.546 |
| s71169.1         | 3  | 129759745 | 0.546 |
| s16589.1         | 7  | 20691591  | 0.546 |
| s59565.1         | 16 | 30667706  | 0.545 |
| OAR14_68274557.1 | 14 | 61754095  | 0.545 |
| OAR16_44226044.1 | 16 | 40705136  | 0.545 |
| OAR2_145195113.1 | 2  | 136512593 | 0.545 |
| s51045.1         | 3  | 25632751  | 0.545 |
| OAR1_145170621.1 | 1  | 134127517 | 0.545 |
| s58543.1         | 13 | 12265286  | 0.545 |
| OAR8_12151702.1  | 8  | 10853693  | 0.545 |
| OAR9_8876882.1   | 9  | 9011390   | 0.544 |
| OAR3_95822218.1  | 3  | 90220353  | 0.544 |
| s44167.1         | 2  | 243153063 | 0.544 |
| OAR4_96453312.1  | 4  | 90884717  | 0.544 |
| OAR5_30583112.1  | 5  | 27557782  | 0.544 |
| OAR16_33224073.1 | 16 | 30559452  | 0.544 |
| s51915.1         | 19 | 44131540  | 0.543 |
| OAR15_76711224.1 | 15 | 70799094  | 0.543 |
| OAR5_40288441.1  | 5  | 36543472  | 0.543 |
| s69481.1         | 2  | 14496716  | 0.543 |
| OAR1_30798950.1  | 1  | 30143388  | 0.543 |
| OAR22_10669315.1 | 22 | 8916969   | 0.543 |
| OAR1_246064756.1 | 1  | 228358337 | 0.543 |
| OAR1_43042460.1  | 1  | 41564355  | 0.543 |
| OAR2_60936578.1  | 2  | 56639600  | 0.543 |
| OAR5_87240867.1  | 5  | 79373938  | 0.543 |

|                    |    |           |       |
|--------------------|----|-----------|-------|
| OAR2_160737599.1   | 2  | 151588637 | 0.543 |
| OAR4_91373356.1    | 4  | 85975743  | 0.542 |
| OAR7_53275088.1    | 7  | 48234767  | 0.542 |
| s70054.1           | 16 | 9207808   | 0.542 |
| s05264.1           | 13 | 65420796  | 0.542 |
| s45070.1           | 7  | 62331047  | 0.542 |
| OAR1_42968648.1    | 1  | 41492360  | 0.542 |
| OAR1_214417389.1   | 1  | 198646310 | 0.542 |
| OAR6_55532476.1    | 6  | 50226730  | 0.542 |
| OAR3_15518578.1    | 3  | 14371537  | 0.542 |
| OAR16_44015351.1   | 16 | 40503694  | 0.541 |
| OAR12_42512998.1   | 12 | 38146891  | 0.541 |
| OAR2_63274739.1    | 2  | 58896602  | 0.541 |
| OAR16_28163128.1   | 16 | 25940847  | 0.541 |
| OAR1_249629551.1   | 1  | 231659828 | 0.541 |
| OAR21_34401682.1   | 21 | 30822358  | 0.541 |
| OAR1_117122442.1   | 1  | 108321166 | 0.541 |
| OAR15_80616593.1   | 15 | 74407015  | 0.541 |
| s07317.1           | 14 | 54848584  | 0.540 |
| OAR16_43133409.1   | 16 | 39659615  | 0.540 |
| OAR3_195291305.1   | 3  | 181380872 | 0.540 |
| OAR10_29389966_X.1 | 10 | 29353089  | 0.540 |
| OAR26_21025118.1   | 26 | 17824781  | 0.540 |
| s62730.1           | 5  | 59295706  | 0.540 |
| OAR16_42159705.1   | 16 | 38851083  | 0.539 |
| OAR7_21639936.1    | 7  | 20784154  | 0.539 |
| s14191.1           | 9  | 32071504  | 0.539 |
| OAR2_140167981.1   | 2  | 131761141 | 0.539 |
| s61003.1           | 3  | 154765061 | 0.538 |
| s62032.1           | 2  | 170563260 | 0.538 |
| OAR3_44233744.1    | 3  | 41320283  | 0.538 |
| OAR16_37467394.1   | 16 | 34475296  | 0.538 |
| OAR11_50751433.1   | 11 | 47776663  | 0.538 |
| OAR15_78598295.1   | 15 | 72520678  | 0.538 |
| s24065.1           | 4  | 103237931 | 0.538 |
| OAR3_78893934.1    | 3  | 74725586  | 0.538 |
| OAR1_79775846.1    | 1  | 74542343  | 0.538 |
| OAR2_180650246.1   | 2  | 170389751 | 0.537 |
| s09340.1           | 15 | 74546560  | 0.537 |
| s39945.1           | 7  | 44271809  | 0.537 |
| OAR4_80646791.1    | 4  | 76055323  | 0.537 |
| OAR3_196880003.1   | 3  | 182867529 | 0.536 |
| OAR6_76377079.1    | 6  | 69873262  | 0.536 |
| OAR4_80416194.1    | 4  | 75818223  | 0.536 |



|                  |    |           |       |
|------------------|----|-----------|-------|
| s16511.1         | 3  | 181316897 | 0.536 |
| OAR17_35455576.1 | 17 | 32500054  | 0.536 |
| s18835.1         | 23 | 2697393   | 0.536 |
| s43545.1         | 15 | 74499985  | 0.536 |
| s27604.1         | 1  | 198629915 | 0.536 |
| OAR9_41445839.1  | 9  | 39471650  | 0.536 |
| OAR8_27446520.1  | 8  | 25025767  | 0.535 |
| OAR5_55127059.1  | 5  | 50841057  | 0.535 |
| OAR2_180261787.1 | 2  | 170218116 | 0.535 |
| OAR2_180267656.1 | 2  | 170221187 | 0.535 |
| OAR3_152090860.1 | 3  | 142262633 | 0.535 |
| OAR3_4471127.1   | 3  | 4483359   | 0.535 |
| OAR22_32799694.1 | 22 | 28489864  | 0.535 |
| OAR6_44719458.1  | 6  | 40035197  | 0.535 |
| OAR10_48888461.1 | 10 | 48124132  | 0.535 |
| s06058.1         | 4  | 39035709  | 0.534 |
| OAR16_15575456.1 | 16 | 14331214  | 0.534 |
| s58020.1         | 3  | 41397228  | 0.534 |
| OAR4_10789078.1  | 4  | 10644494  | 0.534 |
| OAR3_87788635.1  | 3  | 82845251  | 0.534 |
| OAR11_18823250.1 | 11 | 18440783  | 0.534 |
| OAR8_96563089.1  | 8  | 89573903  | 0.534 |
| OAR13_81329564.1 | 13 | 75498647  | 0.533 |
| OAR12_43172807.1 | 12 | 38765389  | 0.533 |
| OAR3_118302402.1 | 3  | 111053851 | 0.533 |
| s61032.1         | 18 | 29723883  | 0.533 |
| OAR3_195161577.1 | 3  | 181180472 | 0.533 |
| OAR5_40108847.1  | 5  | 36361620  | 0.532 |
| OAR6_67376317.1  | 6  | 61138606  | 0.532 |
| OAR3_156734590.1 | 3  | 146887886 | 0.532 |
| OAR5_94259136.1  | 5  | 86043483  | 0.532 |
| OAR1_214229899.1 | 1  | 198470222 | 0.531 |
| OAR15_38872932.1 | 15 | 37026092  | 0.531 |
| OAR10_50107347.1 | 10 | 49263376  | 0.531 |
| OAR26_35965231.1 | 26 | 31624872  | 0.531 |
| OAR3_156691225.1 | 3  | 146838020 | 0.531 |
| s33445.1         | 24 | 25240220  | 0.531 |
| OAR6_44473865.1  | 6  | 39789613  | 0.531 |
| OAR6_23189054.1  | 6  | 20222258  | 0.531 |
| OAR3_4694801.1   | 3  | 4700819   | 0.530 |
| OAR3_197179842.1 | 3  | 183150221 | 0.530 |
| OAR2_165382716.1 | 2  | 155969590 | 0.530 |
| OAR3_195197327.1 | 3  | 181219459 | 0.530 |
| s34288.1         | 1  | 191440155 | 0.530 |

|                    |    |           |       |
|--------------------|----|-----------|-------|
| OAR15_20586574.1   | 15 | 19913859  | 0.529 |
| OAR3_225570777.1   | 3  | 207988763 | 0.529 |
| OAR6_80988051.1    | 6  | 74188622  | 0.529 |
| s14772.1           | 3  | 5146200   | 0.529 |
| OAR19_33531772.1   | 19 | 31856390  | 0.529 |
| s26710.1           | 19 | 53596723  | 0.529 |
| OAR3_156766007_X.1 | 3  | 146921476 | 0.529 |
| OAR2_259153647.1   | 2  | 245206162 | 0.529 |
| s53951.1           | 6  | 23688531  | 0.528 |
| OAR23_38365072.1   | 23 | 36293219  | 0.528 |
| OAR12_43199598.1   | 12 | 38805757  | 0.528 |
| OAR10_48898826.1   | 10 | 48135136  | 0.528 |
| OAR18_68792365.1   | 18 | 64909980  | 0.528 |
| s69625.1           | 14 | 23274589  | 0.528 |
| OAR12_62571692.1   | 12 | 56214960  | 0.528 |
| OAR3_44291290.1    | 3  | 41375055  | 0.527 |
| OAR4_27853334.1    | 4  | 26449971  | 0.527 |
| OAR18_34149127.1   | 18 | 32659588  | 0.527 |
| s71544.1           | 17 | 60954982  | 0.527 |
| s39351.1           | 3  | 183075730 | 0.527 |
| OAR9_76802154.1    | 9  | 72375489  | 0.526 |
| s19722.1           | 15 | 27287086  | 0.526 |
| OAR6_124660937.1   | 6  | 109711650 | 0.526 |
| s23582.1           | 8  | 28025413  | 0.526 |
| s08060.1           | 21 | 24530208  | 0.526 |
| OAR9_99774199.1    | 9  | 93761494  | 0.526 |
| OAR3_232134900.1   | 3  | 214158027 | 0.526 |
| OAR7_18356443.1    | 7  | 17660376  | 0.526 |
| OAR10_86141363.1   | 10 | 78916131  | 0.525 |
| s39725.1           | 10 | 13487310  | 0.525 |
| OAR17_29119468.1   | 8  | 82471334  | 0.525 |
| s67277.1           | 18 | 59152360  | 0.525 |
| s04965.1           | 3  | 208078768 | 0.525 |
| OAR13_38561999.1   | 13 | 35163552  | 0.525 |
| s33255.1           | 4  | 65021659  | 0.524 |
| s45053.1           | 16 | 70559566  | 0.524 |
| OAR6_44769116.1    | 6  | 40084437  | 0.524 |
| OAR15_14742464.1   | 15 | 14639505  | 0.524 |
| OAR11_6228500.1    | 11 | 6725442   | 0.524 |
| OAR5_59436109.1    | 5  | 54625756  | 0.523 |
| OAR26_46921474.1   | 26 | 41364432  | 0.523 |
| OAR6_120486822_X.1 | 6  | 106042672 | 0.522 |
| OAR8_88991389.1    | 8  | 82529068  | 0.522 |
| OAR3_95711572.1    | 3  | 90106223  | 0.522 |

|                  |    |           |       |
|------------------|----|-----------|-------|
| s57574.1         | 14 | 56384913  | 0.522 |
| OAR4_91397094.1  | 4  | 85999313  | 0.522 |
| s29948.1         | 6  | 45352624  | 0.522 |
| s43247.1         | 1  | 76041981  | 0.522 |
| OAR2_131889391.1 | 2  | 123671526 | 0.522 |
| s09832.1         | 7  | 48944499  | 0.521 |
| OAR6_120480090.1 | 6  | 106035342 | 0.521 |
| s31978.1         | 3  | 5123441   | 0.521 |
| s66349.1         | 1  | 68199001  | 0.521 |
| s39735.1         | 14 | 19615508  | 0.520 |
| OAR6_27354451.1  | 6  | 23965040  | 0.520 |
| OAR22_10602337.1 | 22 | 8859266   | 0.519 |
| s75037.1         | 5  | 67865996  | 0.519 |
| s03682.1         | 12 | 27035129  | 0.519 |
| OAR23_32486938.1 | 23 | 30809730  | 0.519 |
| s31825.1         | 13 | 35979114  | 0.519 |
| s45473.1         | 17 | 60141056  | 0.519 |
| s53085.1         | 3  | 4543145   | 0.519 |
| OAR1_281749581.1 | 1  | 260357828 | 0.519 |
| s20188.1         | 18 | 29519813  | 0.519 |
| OAR14_27546419.1 | 14 | 26371515  | 0.518 |
| s21579.1         | 7  | 11778527  | 0.518 |
| OAR3_92910516.1  | 3  | 87752928  | 0.518 |
| s57805.1         | 26 | 7244869   | 0.518 |
| OAR1_181917984.1 | 1  | 168696731 | 0.518 |
| OAR6_76321832.1  | 6  | 69827951  | 0.518 |
| OAR3_53626593.1  | 3  | 50929192  | 0.518 |
| OAR3_122241058.1 | 3  | 114684255 | 0.518 |
| s41600.1         | 8  | 28018925  | 0.518 |
| OAR15_72182875.1 | 15 | 66675925  | 0.518 |
| OAR4_93149584.1  | 4  | 87732399  | 0.518 |
| OAR15_55438774.1 | 15 | 50730627  | 0.518 |
| s73153.1         | 8  | 80104991  | 0.517 |
| OAR10_48546137.1 | 10 | 47797098  | 0.517 |
| s38018.1         | 13 | 43846221  | 0.517 |
| OAR23_3024132.1  | 23 | 2762841   | 0.517 |
| OAR16_33555314.1 | 16 | 30922730  | 0.516 |
| s49903.1         | 5  | 59260702  | 0.516 |
| OAR5_94989910.1  | 5  | 86891042  | 0.516 |
| OAR9_1625333.1   | 9  | 1906814   | 0.516 |
| OAR6_44450940.1  | 6  | 39767543  | 0.516 |
| OAR8_64247515.1  | 8  | 59597770  | 0.515 |
| OAR9_87534142.1  | 9  | 82734427  | 0.515 |
| s40766.1         | 7  | 17329557  | 0.515 |

|                   |    |           |       |
|-------------------|----|-----------|-------|
| OAR16_33184393.1  | 16 | 30522362  | 0.515 |
| OAR2_61094453.1   | 2  | 56804497  | 0.515 |
| OAR5_96574870.1   | 5  | 88548058  | 0.515 |
| s41370.1          | 3  | 5062211   | 0.515 |
| OAR3_57525359.1   | 3  | 54430593  | 0.515 |
| OAR26_21099683.1  | 26 | 17856378  | 0.515 |
| OAR15_40325037.1  | 15 | 38495418  | 0.515 |
| OAR10_90612987.1  | 10 | 83028244  | 0.515 |
| OAR16_9870495.1   | 16 | 9003821   | 0.514 |
| OAR3_92944291.1   | 3  | 87779593  | 0.514 |
| OAR1_43083702.1   | 1  | 41602942  | 0.514 |
| DU324205_588.1    | 2  | 232771356 | 0.514 |
| s18566.1          | 15 | 54478418  | 0.514 |
| s28047.1          | 15 | 31746519  | 0.514 |
| OAR1_117165620.1  | 1  | 108366171 | 0.514 |
| s32851.1          | 1  | 245923408 | 0.514 |
| s23721.1          | 2  | 238643447 | 0.514 |
| OAR15_28048435.1  | 15 | 26731567  | 0.514 |
| s69711.1          | 9  | 14272267  | 0.514 |
| OAR3_103689521.1  | 3  | 97441687  | 0.514 |
| OAR6_43064935.1   | 6  | 38668794  | 0.514 |
| OAR9_33331072.1   | 9  | 31817019  | 0.514 |
| OAR15_38720759.1  | 15 | 36890254  | 0.513 |
| OAR3_203583202.1  | 3  | 189046770 | 0.513 |
| OAR4_21092552.1   | 4  | 20256712  | 0.513 |
| OAR2_63781435.1   | 2  | 59306755  | 0.513 |
| s65198.1          | 12 | 44498233  | 0.513 |
| OAR8_60196419.1   | 8  | 56189320  | 0.513 |
| OAR6_43034224.1   | 6  | 38639963  | 0.513 |
| OAR26_9628606.1   | 26 | 7472379   | 0.513 |
| OAR23_3005816.1   | 23 | 2744610   | 0.513 |
| OAR15_26646294.1  | 15 | 25481842  | 0.513 |
| OAR10_68163245.1  | 10 | 65948793  | 0.512 |
| OAR7_43593010.1   | 7  | 39394100  | 0.512 |
| OAR7_68548573.1   | 7  | 62691903  | 0.512 |
| s37611.1          | 2  | 245016588 | 0.512 |
| OAR2_117650043.1  | 2  | 109394432 | 0.512 |
| s12396.1          | 2  | 110554687 | 0.512 |
| OAR5_93678808.1   | 5  | 85470418  | 0.511 |
| OAR5_105926150.1  | 5  | 97354788  | 0.511 |
| OAR16_42172047.1  | 16 | 38862399  | 0.510 |
| s51748.1          | 5  | 59300808  | 0.510 |
| OAR5_30620006_X.1 | 5  | 27593189  | 0.510 |
| s19236.1          | 3  | 183135436 | 0.510 |

|                    |    |           |       |
|--------------------|----|-----------|-------|
| OAR1_260939703.1   | 4  | 106932088 | 0.510 |
| OAR1_149631902.1   | 1  | 138506294 | 0.510 |
| OAR2_221524097.1   | 2  | 209259024 | 0.510 |
| s61002.1           | 16 | 17460862  | 0.510 |
| s43611.1           | 1  | 107965473 | 0.510 |
| s21965.1           | 11 | 12580028  | 0.509 |
| OAR5_80804886.1    | 5  | 73554040  | 0.509 |
| OAR1_16480770.1    | 1  | 16474302  | 0.509 |
| OAR1_279502546.1   | 1  | 258589935 | 0.509 |
| s30117.1           | 22 | 18619609  | 0.508 |
| OAR16_37770793_X.1 | 16 | 34690414  | 0.508 |
| OAR3_135687490.1   | 3  | 127211233 | 0.508 |
| s17221.1           | 9  | 84920003  | 0.508 |
| OAR16_27149060.1   | 16 | 24977627  | 0.508 |
| OAR6_64800913.1    | 6  | 58816416  | 0.508 |
| s73063.1           | 7  | 82851545  | 0.508 |
| OAR2_40373894.1    | 2  | 38795830  | 0.508 |
| OAR3_45774145.1    | 3  | 42749955  | 0.508 |
| OAR1_71610348.1    | 1  | 67018785  | 0.507 |
| OAR11_18701428.1   | 11 | 18325488  | 0.507 |
| OAR11_18711856.1   | 11 | 18335747  | 0.507 |
| OAR22_38946909.1   | 22 | 34121320  | 0.507 |
| OAR12_62615870.1   | 12 | 56261324  | 0.507 |
| OAR14_20057933.1   | 14 | 19647418  | 0.506 |
| OAR1_156875899_X.1 | 1  | 145339557 | 0.506 |
| s15682.1           | 25 | 41768454  | 0.506 |
| s32813.1           | 7  | 39390045  | 0.506 |
| OAR3_84882715.1    | 3  | 80279564  | 0.506 |
| OAR1_106884058.1   | 1  | 99602130  | 0.506 |
| OAR1_232191666.1   | 1  | 215174264 | 0.506 |
| OAR19_1651207.1    | 19 | 1632692   | 0.506 |
| OAR1_245730132.1   | 1  | 228049380 | 0.506 |
| OAR2_19500065.1    | 2  | 19163821  | 0.505 |
| OAR6_45004760.1    | 6  | 40325304  | 0.505 |
| OAR2_65702051.1    | 2  | 61245971  | 0.505 |
| s37564.1           | 3  | 165413630 | 0.505 |
| OAR12_30481802.1   | 12 | 26976828  | 0.505 |
| s33649.1           | 4  | 103224760 | 0.505 |
| OAR2_215636399.1   | 2  | 203788683 | 0.505 |
| OAR3_122249804.1   | 3  | 114691829 | 0.505 |
| OAR1_117951301.1   | 1  | 109177873 | 0.505 |
| s39245.1           | 4  | 113410788 | 0.505 |
| s23284.1           | 3  | 37747759  | 0.505 |
| OAR2_41944715.1    | 2  | 40269973  | 0.505 |

|                    |    |           |       |
|--------------------|----|-----------|-------|
| s31685.1           | 22 | 43182266  | 0.504 |
| s04872.1           | 3  | 77787703  | 0.504 |
| s45361.1           | 6  | 113208301 | 0.504 |
| OAR5_26029786.1    | 5  | 23210050  | 0.504 |
| OAR16_37779529.1   | 16 | 34679175  | 0.504 |
| OAR7_61660987.1    | 7  | 55726352  | 0.504 |
| OAR2_146752433.1   | 2  | 138151463 | 0.504 |
| OAR23_49228531_X.1 | 23 | 46500641  | 0.503 |
| OAR13_8755501.1    | 13 | 7768983   | 0.503 |
| OAR2_42759240.1    | 2  | 40923200  | 0.503 |
| OAR10_28029657.1   | 10 | 28014277  | 0.503 |
| OAR3_233561444.1   | 3  | 215487255 | 0.503 |
| s10838.1           | 13 | 65840975  | 0.503 |
| OAR3_232198069.1   | 3  | 214218467 | 0.503 |
| s36409.1           | 23 | 2462202   | 0.502 |
| s46459.1           | 2  | 138226568 | 0.502 |
| OAR1_52607477.1    | 1  | 50465210  | 0.502 |
| OAR8_44684641.1    | 8  | 41478607  | 0.502 |
| OAR1_206274474.1   | 1  | 191152073 | 0.502 |
| OAR8_58842830.1    | 8  | 54911849  | 0.502 |
| s20082.1           | 19 | 56296821  | 0.502 |
| s06021.1           | 1  | 45070786  | 0.502 |
| s08299.1           | 7  | 42907174  | 0.502 |
| OAR6_120433331.1   | 6  | 105984644 | 0.502 |
| OAR14_39834952.1   | 14 | 38250883  | 0.501 |
| s67459.1           | 12 | 75057710  | 0.501 |
| OAR2_145109349.1   | 2  | 136442416 | 0.501 |
| OAR3_127833064.1   | 3  | 120032144 | 0.501 |
| s23053.1           | 12 | 63448289  | 0.501 |
| s55111.1           | 1  | 260284248 | 0.501 |
| s41467.1           | 26 | 36138131  | 0.501 |
| s48830.1           | 1  | 68061632  | 0.500 |
| OAR1_245583569.1   | 1  | 227903221 | 0.500 |
| OAR4_96338094.1    | 4  | 90764708  | 0.500 |
| OAR2_91750500.1    | 2  | 86266274  | 0.500 |
| OAR12_16257610.1   | 12 | 13596021  | 0.500 |
| s28736.1           | 2  | 13932966  | 0.500 |
| OAR6_6343216.1     | 6  | 4306619   | 0.500 |
| OAR13_8168026.1    | 13 | 7214961   | 0.500 |
| s38656.1           | 19 | 43212090  | 0.500 |
| OAR17_35388997.1   | 17 | 32435431  | 0.500 |
| OAR1_45896510.1    | 1  | 44322623  | 0.499 |
| OAR19_23119299.1   | 19 | 21996583  | 0.499 |
| OAR1_232161366.1   | 1  | 215145368 | 0.499 |

|                  |    |           |       |
|------------------|----|-----------|-------|
| s36709.1         | 5  | 97322182  | 0.499 |
| OAR3_4733096.1   | 3  | 4737569   | 0.499 |
| OAR17_28687373.1 | 17 | 26152386  | 0.499 |
| OAR2_141546800.1 | 2  | 133040292 | 0.499 |
| s42756.1         | 6  | 868868    | 0.499 |
| OAR11_34497217.1 | 11 | 32274192  | 0.499 |
| OAR26_35926259.1 | 26 | 31588369  | 0.499 |
| s59649.1         | 20 | 15613020  | 0.499 |
| OAR9_32928388.1  | 9  | 31436214  | 0.499 |
| OAR1_81125140.1  | 1  | 75937545  | 0.499 |
| OAR1_221226809.1 | 1  | 204866048 | 0.498 |
| s17646.1         | 3  | 90772017  | 0.498 |
| s07311.1         | 17 | 17030366  | 0.498 |
| OAR1_52398580.1  | 1  | 50250861  | 0.498 |
| s30198.1         | 26 | 26347958  | 0.498 |
| s11164.1         | 4  | 70385766  | 0.498 |
| OAR9_60143990.1  | 9  | 57228393  | 0.498 |
| OAR13_72735047.1 | 13 | 67561757  | 0.498 |
| DU296930_365.1   | 7  | 44204454  | 0.498 |
| OAR9_82857185.1  | 9  | 78159432  | 0.498 |
| s36390.1         | 11 | 41680008  | 0.498 |
| s27301.1         | 6  | 23912970  | 0.497 |
| OAR3_27655471.1  | 3  | 25602551  | 0.497 |
| OAR9_79410987.1  | 9  | 74839637  | 0.497 |
| OAR13_73111137.1 | 13 | 67942670  | 0.497 |
| OAR10_45769189.1 | 10 | 45184017  | 0.497 |
| OAR2_133088440.1 | 2  | 124907852 | 0.497 |
| s09574.1         | 6  | 69061103  | 0.497 |
| OAR6_37459560.1  | 6  | 33467474  | 0.497 |
| s30707.1         | 25 | 14961423  | 0.497 |
| s73318.1         | 3  | 103893158 | 0.497 |
| OAR1_144742152.1 | 1  | 133776177 | 0.497 |
| s32962.1         | 11 | 61580519  | 0.496 |
| OAR5_112273600.1 | 5  | 103136478 | 0.496 |
| OAR3_152889025.1 | 3  | 143046737 | 0.496 |
| s21001.1         | 26 | 23065510  | 0.496 |
| OAR8_84878537.1  | 8  | 78705571  | 0.496 |
| OAR6_19924257.1  | 6  | 17008003  | 0.496 |
| s35810.1         | 1  | 90630943  | 0.496 |
| s43383.1         | 24 | 38985778  | 0.496 |
| OAR2_61169025.1  | 2  | 56880389  | 0.495 |
| DU317902_536.1   | 8  | 10705915  | 0.495 |
| OAR14_33142743.1 | 14 | 31832814  | 0.495 |
| OAR6_45040786.1  | 6  | 40356705  | 0.495 |

|                    |    |           |       |
|--------------------|----|-----------|-------|
| OAR7_43027191.1    | 7  | 38944126  | 0.495 |
| s73474.1           | 10 | 85695176  | 0.495 |
| OAR4_86671539.1    | 4  | 81579878  | 0.495 |
| s61390.1           | 25 | 29623004  | 0.495 |
| OAR3_196506344.1   | 3  | 182497551 | 0.495 |
| OAR12_85001046.1   | 12 | 77094271  | 0.495 |
| OAR4_11339554.1    | 4  | 11195774  | 0.495 |
| OAR10_49074172.1   | 10 | 48300368  | 0.495 |
| OAR9_1497546.1     | 9  | 1776818   | 0.495 |
| OAR2_141764296.1   | 2  | 133272817 | 0.494 |
| OAR9_7003718.1     | 9  | 7145715   | 0.494 |
| s12590.1           | 18 | 20040105  | 0.494 |
| s15191.1           | 16 | 39007570  | 0.494 |
| s05053.1           | 17 | 63298962  | 0.494 |
| s07518.1           | 5  | 58793978  | 0.494 |
| OAR1_156775749.1   | 1  | 145235658 | 0.494 |
| OAR17_75701731.1   | 17 | 69462601  | 0.493 |
| OAR5_98944989.1    | 5  | 90712035  | 0.493 |
| s10292.1           | 25 | 41750825  | 0.493 |
| s23007.1           | 12 | 13495876  | 0.493 |
| s57470.1           | 24 | 1938133   | 0.493 |
| s29690.1           | 5  | 36496148  | 0.493 |
| OAR5_108434752.1   | 5  | 99559078  | 0.493 |
| s16964.1           | 13 | 30656334  | 0.493 |
| OAR1_109602753.1   | 1  | 101965756 | 0.493 |
| OAR1_51923225.1    | 1  | 49788536  | 0.493 |
| OAR1_279560752.1   | 1  | 258640124 | 0.493 |
| OAR6_101291449.1   | 6  | 92319183  | 0.493 |
| OAR15_77962165.1   | 15 | 71926872  | 0.493 |
| OAR3_179813294.1   | 3  | 167375732 | 0.493 |
| OAR2_66116376.1    | 2  | 61657597  | 0.493 |
| s29854.1           | 5  | 79322514  | 0.493 |
| s18119.1           | 9  | 32284404  | 0.493 |
| OAR7_55075040.1    | 7  | 49719850  | 0.493 |
| OAR2_124173700.1   | 2  | 116166895 | 0.493 |
| OAR1_281649480.1   | 1  | 260317241 | 0.492 |
| OAR14_19829145.1   | 14 | 19407789  | 0.492 |
| OAR13_17030546_X.1 | 13 | 11865807  | 0.492 |
| OAR3_203907310.1   | 3  | 189329851 | 0.492 |
| s66799.1           | 21 | 24578652  | 0.492 |
| OAR4_80710186.1    | 4  | 76106568  | 0.492 |
| OAR17_9725212.1    | 17 | 8762592   | 0.492 |
| OAR3_98857686.1    | 3  | 93150623  | 0.492 |
| s51903.1           | 17 | 63961031  | 0.492 |



|                    |    |           |       |
|--------------------|----|-----------|-------|
| DU381045_479.1     | 14 | 61164458  | 0.492 |
| s52618.1           | 5  | 59485810  | 0.492 |
| OAR8_55750248.1    | 8  | 51902877  | 0.491 |
| OAR9_30026380.1    | 9  | 28723219  | 0.491 |
| OAR16_43196533.1   | 16 | 39713867  | 0.491 |
| OAR5_112227256.1   | 5  | 103087994 | 0.491 |
| OAR3_92904936.1    | 3  | 87747902  | 0.491 |
| OAR5_94755795.1    | 5  | 86658080  | 0.491 |
| OAR1_45270297.1    | 1  | 43681990  | 0.491 |
| s42972.1           | 1  | 261414809 | 0.490 |
| OAR4_114665630.1   | 4  | 107206095 | 0.490 |
| OAR9_1473217.1     | 9  | 1751809   | 0.490 |
| OAR25_31570574.1   | 25 | 30210216  | 0.490 |
| OAR3_152509773_X.1 | 3  | 142676994 | 0.490 |
| OAR10_28385909.1   | 10 | 28371400  | 0.490 |
| s32565.1           | 5  | 36059582  | 0.490 |
| OAR1_220545599_X.1 | 1  | 204205759 | 0.490 |
| s39632.1           | 8  | 19596761  | 0.490 |
| OAR26_14501727.1   | 26 | 11785652  | 0.489 |
| OAR1_124151951.1   | 1  | 115131726 | 0.489 |
| s67786.1           | 12 | 25049404  | 0.489 |
| OAR15_37813948.1   | 15 | 35973111  | 0.489 |
| OAR24_8719574.1    | 24 | 7483090   | 0.489 |
| s18948.1           | 7  | 44258658  | 0.489 |
| OAR2_65907499.1    | 2  | 61449429  | 0.489 |
| s71258.1           | 17 | 16987281  | 0.489 |
| OAR2_34308093.1    | 2  | 32995715  | 0.489 |
| s63142.1           | 13 | 32868564  | 0.489 |
| OAR19_23147477.1   | 19 | 22023369  | 0.489 |
| s47846.1           | 1  | 243372009 | 0.489 |
| s22354.1           | 11 | 47578629  | 0.489 |
| OAR11_34637871.1   | 11 | 32411650  | 0.488 |
| OAR4_59938222.1    | 4  | 56746895  | 0.488 |
| s25959.1           | 11 | 30692319  | 0.488 |
| s28814.1           | 3  | 103477989 | 0.488 |
| OAR19_30535417.1   | 19 | 28943148  | 0.488 |
| OAR26_29804026.1   | 26 | 25738479  | 0.488 |
| OAR15_32949553.1   | 15 | 31492057  | 0.488 |
| OAR15_20741447.1   | 15 | 19935052  | 0.488 |
| OAR4_50013760.1    | 4  | 47296741  | 0.488 |
| OAR16_48444618.1   | 16 | 44501487  | 0.488 |
| OAR4_68712576.1    | 4  | 64957575  | 0.487 |
| OAR13_26732874.1   | 13 | 24150509  | 0.487 |
| s03044.1           | 21 | 45197021  | 0.487 |

|                  |    |           |       |
|------------------|----|-----------|-------|
| s04530.1         | 3  | 217143245 | 0.487 |
| OAR1_72635280.1  | 1  | 68118567  | 0.486 |
| OAR2_128835133.1 | 2  | 120501335 | 0.486 |
| s04158.1         | 1  | 227782846 | 0.486 |
| s68471.1         | 2  | 13928073  | 0.486 |
| OAR4_13235164.1  | 4  | 13051653  | 0.486 |
| OAR6_101835781.1 | 6  | 92817046  | 0.486 |
| OAR2_203533603.1 | 2  | 192149660 | 0.485 |
| OAR25_13459673.1 | 25 | 13170473  | 0.485 |
| OAR3_95910669.1  | 3  | 90308553  | 0.485 |
| OAR9_33550471.1  | 9  | 32025839  | 0.485 |
| OAR1_181938531.1 | 1  | 168716279 | 0.485 |
| OAR22_42978165.1 | 22 | 38194425  | 0.485 |
| s51831.1         | 9  | 78451353  | 0.485 |
| s51574.1         | 21 | 42278850  | 0.485 |
| OAR3_84974488.1  | 3  | 80369355  | 0.485 |
| OAR19_17697790.1 | 19 | 16934497  | 0.485 |
| s27767.1         | 22 | 18649988  | 0.485 |
| OAR10_30059832.1 | 10 | 30025043  | 0.485 |
| OAR1_245412211.1 | 1  | 227804584 | 0.484 |
| s62569.1         | 3  | 7182050   | 0.484 |
| OAR2_95733865.1  | 2  | 89239384  | 0.484 |
| OAR16_33136420.1 | 16 | 30477701  | 0.484 |
| s28909.1         | 2  | 136485296 | 0.484 |
| OAR6_111041196.1 | 6  | 100919997 | 0.484 |
| OAR13_2388727.1  | 13 | 1861848   | 0.483 |
| OAR2_245879797.1 | 2  | 232791702 | 0.483 |
| OAR16_13527056.1 | 16 | 12453059  | 0.483 |
| OAR8_86672870.1  | 8  | 80423696  | 0.483 |
| OAR7_50086827.1  | 7  | 45356120  | 0.483 |
| s06234.1         | 1  | 262938591 | 0.483 |
| OAR7_90352641.1  | 7  | 82979915  | 0.483 |
| OAR14_58084909.1 | 14 | 54913688  | 0.483 |
| s62669.1         | 13 | 64345635  | 0.483 |
| s75402.1         | 19 | 45399607  | 0.483 |
| OAR3_16713871.1  | 3  | 15482582  | 0.483 |
| OAR13_38550737.1 | 13 | 35153816  | 0.483 |
| s55525.1         | 5  | 88367189  | 0.483 |
| s05468.1         | 15 | 31807894  | 0.483 |
| s48689.1         | 5  | 17065689  | 0.483 |
| OAR23_2188429.1  | 23 | 1946410   | 0.483 |
| s71629.1         | 1  | 27398178  | 0.482 |
| OAR10_84355226.1 | 10 | 77142109  | 0.482 |
| OAR2_143195752.1 | 2  | 134667278 | 0.482 |

|                    |    |           |       |
|--------------------|----|-----------|-------|
| OAR3_27713287.1    | 3  | 25659112  | 0.482 |
| s13245.1           | 23 | 31161678  | 0.482 |
| s48633.1           | 18 | 21691344  | 0.482 |
| OAR2_60738297.1    | 2  | 56446750  | 0.482 |
| OAR4_93235191.1    | 4  | 87800446  | 0.482 |
| OAR2_141513613.1   | 2  | 133009157 | 0.482 |
| OAR1_52767848.1    | 1  | 50621736  | 0.481 |
| OAR2_66195373.1    | 2  | 61735560  | 0.481 |
| OAR3_79055518.1    | 3  | 74855304  | 0.481 |
| OAR6_15450053.1    | 6  | 12892260  | 0.481 |
| OAR2_145075673.1   | 2  | 136412426 | 0.481 |
| OAR23_32570581.1   | 23 | 30889404  | 0.481 |
| OAR19_31737971_X.1 | 19 | 30098502  | 0.481 |
| OAR15_8363565.1    | 15 | 8651422   | 0.481 |
| s27554.1           | 14 | 38306508  | 0.481 |
| OAR16_37614079.1   | 16 | 34625175  | 0.481 |
| OAR2_3394232.1     | 2  | 4556476   | 0.480 |
| s33128.1           | 3  | 104217317 | 0.480 |
| s01940.1           | 2  | 23277528  | 0.480 |
| OAR26_49379510.1   | 26 | 43479991  | 0.480 |
| s33596.1           | 3  | 4658152   | 0.480 |
| OAR1_265606095.1   | 1  | 245969875 | 0.480 |
| OAR8_80619619.1    | 8  | 74682690  | 0.479 |
| OAR8_87046223.1    | 8  | 80774629  | 0.479 |
| OAR22_12905080.1   | 22 | 10962391  | 0.479 |
| s00040.1           | 15 | 27235356  | 0.479 |
| OAR23_38260590.1   | 23 | 36185015  | 0.479 |
| s62496.1           | 2  | 14402382  | 0.479 |
| OAR15_13190017_X.1 | 15 | 13177045  | 0.479 |
| s28171.1           | 7  | 40030408  | 0.479 |
| s03280.1           | 25 | 40741284  | 0.479 |
| OAR22_29227333.1   | 22 | 24908175  | 0.479 |
| s46527.1           | 13 | 68404235  | 0.479 |
| OAR5_87366264.1    | 5  | 79478908  | 0.479 |
| OAR15_28910424.1   | 15 | 27591341  | 0.479 |
| s30085.1           | 3  | 80164042  | 0.479 |
| s19977.1           | 9  | 90540171  | 0.479 |
| OAR2_243336495.1   | 2  | 230359001 | 0.479 |
| s42036.1           | 7  | 73758940  | 0.478 |
| OAR3_22309460.1    | 3  | 20643497  | 0.478 |
| s12848.1           | 2  | 191834956 | 0.478 |
| s62290.1           | 3  | 97382388  | 0.478 |
| OAR2_118492152.1   | 2  | 110284541 | 0.478 |
| OAR6_55564892.1    | 6  | 50257985  | 0.478 |

|                  |    |           |       |
|------------------|----|-----------|-------|
| s25228.1         | 15 | 31291443  | 0.478 |
| s67403.1         | 3  | 104001939 | 0.478 |
| s25920.1         | 8  | 80872789  | 0.478 |
| OAR14_16764006.1 | 14 | 16283237  | 0.478 |
| OAR22_45546460.1 | 22 | 40518236  | 0.478 |
| s03597.1         | 6  | 113440194 | 0.478 |
| OAR8_57889261.1  | 8  | 53999261  | 0.478 |
| s64801.1         | 18 | 21628895  | 0.478 |
| OAR5_62692616.1  | 5  | 57289343  | 0.478 |
| s46498.1         | 17 | 69517635  | 0.477 |
| s27209.1         | 12 | 68444880  | 0.477 |
| s30564.1         | 8  | 28037083  | 0.477 |
| OAR3_226870159.1 | 3  | 209206117 | 0.477 |
| s47031.1         | 22 | 49622964  | 0.477 |
| OAR8_18067475.1  | 8  | 16186584  | 0.477 |
| s51441.1         | 19 | 13577090  | 0.477 |
| OAR4_21244142.1  | 4  | 20398963  | 0.477 |
| OAR1_166085590.1 | 1  | 154275654 | 0.477 |
| OAR2_143949087.1 | 2  | 135337045 | 0.476 |
| OAR1_245352370.1 | 1  | 227745997 | 0.476 |
| OAR9_6578440.1   | 9  | 6652961   | 0.476 |
| OAR1_124002420.1 | 1  | 115091200 | 0.476 |
| OAR3_162494508.1 | 3  | 152029515 | 0.476 |
| OAR6_91229780.1  | 6  | 83488418  | 0.476 |
| OAR2_77016276.1  | 2  | 72254024  | 0.476 |
| s62140.1         | 1  | 185546271 | 0.476 |
| OAR2_86617792.1  | 2  | 81452694  | 0.475 |
| OAR23_32059301.1 | 23 | 30537717  | 0.475 |
| s53274.1         | 1  | 7748239   | 0.475 |
| OAR1_265516050.1 | 1  | 245879353 | 0.475 |
| OAR2_144406868.1 | 2  | 135796714 | 0.475 |
| s40291.1         | 11 | 41530998  | 0.475 |
| OAR13_41982854.1 | 13 | 38520473  | 0.475 |
| s31212.1         | 23 | 20160121  | 0.475 |
| s49070.1         | 1  | 109251246 | 0.475 |
| OAR3_95548607.1  | 3  | 90046082  | 0.475 |
| s16604.1         | 24 | 20005048  | 0.475 |
| OAR1_52908583.1  | 1  | 50766596  | 0.475 |
| OAR16_15512379.1 | 16 | 14273045  | 0.474 |
| OAR6_568937.1    | 6  | 813227    | 0.474 |
| OAR3_78128087.1  | 3  | 73964191  | 0.474 |
| s21107.1         | 25 | 7618495   | 0.474 |
| OAR1_53726695.1  | 1  | 51449360  | 0.474 |
| s19550.1         | 4  | 47483537  | 0.474 |

|                    |    |           |       |
|--------------------|----|-----------|-------|
| OAR4_50210185.1    | 4  | 47486423  | 0.474 |
| s57405.1           | 2  | 124467465 | 0.474 |
| s23854.1           | 10 | 13428227  | 0.474 |
| OAR6_91476645.1    | 9  | 60802870  | 0.474 |
| s61506.1           | 9  | 32003055  | 0.474 |
| s36620.1           | 5  | 59507633  | 0.474 |
| OAR8_33710104.1    | 8  | 30994440  | 0.473 |
| OAR18_33027908.1   | 18 | 31650188  | 0.473 |
| s24134.1           | 11 | 47885965  | 0.473 |
| OAR25_32156972.1   | 25 | 30802961  | 0.473 |
| s33774.1           | 7  | 73731645  | 0.473 |
| s42653.1           | 3  | 104154438 | 0.473 |
| OAR1_149763555.1   | 1  | 138616449 | 0.473 |
| OAR15_76144996.1   | 15 | 70199575  | 0.473 |
| OAR1_198827329.1   | 1  | 184250056 | 0.473 |
| s46479.1           | 16 | 8968749   | 0.473 |
| OAR5_104118989.1   | 5  | 95589703  | 0.473 |
| s25195.1           | 25 | 7392689   | 0.473 |
| s08622.1           | 1  | 251795181 | 0.473 |
| OAR2_20784358.1    | 2  | 20379763  | 0.473 |
| s34980.1           | 10 | 27398550  | 0.473 |
| OAR16_33253515.1   | 16 | 30589279  | 0.472 |
| OAR10_12067705.1   | 10 | 13509048  | 0.472 |
| s16015.1           | 1  | 100001324 | 0.472 |
| OAR10_86074123.1   | 10 | 78849033  | 0.472 |
| OAR24_42974369.1   | 24 | 39757470  | 0.472 |
| s00503.1           | 2  | 61227472  | 0.472 |
| OAR8_22108137.1    | 8  | 19611240  | 0.472 |
| s30686.1           | 22 | 40258358  | 0.472 |
| OAR1_72776475.1    | 1  | 68250822  | 0.472 |
| OAR8_27294787.1    | 8  | 24860110  | 0.472 |
| OAR9_8215268.1     | 9  | 8311300   | 0.472 |
| OAR7_77829558.1    | 7  | 71010039  | 0.472 |
| s42703.1           | 25 | 17652415  | 0.472 |
| OAR2_92655139.1    | 2  | 87113994  | 0.472 |
| OAR25_31530072_X.1 | 25 | 30169926  | 0.472 |
| s67777.1           | 7  | 20716990  | 0.472 |
| s42921.1           | 15 | 64119066  | 0.472 |
| OAR3_15534872.1    | 3  | 14388844  | 0.472 |
| OAR15_13695309.1   | 15 | 13680245  | 0.472 |
| OAR3_57489213.1    | 3  | 54368964  | 0.471 |
| s05399.1           | 15 | 38530749  | 0.471 |
| OAR7_44587319.1    | 7  | 40270425  | 0.471 |
| s43298.1           | 21 | 30695655  | 0.471 |

|                    |    |           |       |
|--------------------|----|-----------|-------|
| s03860.1           | 7  | 42006386  | 0.471 |
| OAR2_213278806.1   | 2  | 201514161 | 0.471 |
| OAR6_47541995.1    | 6  | 42591389  | 0.471 |
| s09113.1           | 19 | 44286116  | 0.471 |
| OAR3_235332945.1   | 3  | 217195979 | 0.471 |
| s08824.1           | 20 | 39776900  | 0.471 |
| DU397126_450.1     | 14 | 38330512  | 0.470 |
| s70994.1           | 19 | 16888900  | 0.470 |
| s32734.1           | 19 | 45854502  | 0.470 |
| OAR7_100185924.1   | 7  | 91993631  | 0.470 |
| s53959.1           | 26 | 7435938   | 0.470 |
| OAR11_12207260.1   | 11 | 12456595  | 0.470 |
| OAR22_29129826.1   | 22 | 24803666  | 0.470 |
| s55016.1           | 13 | 80920190  | 0.470 |
| OAR1_52004573.1    | 1  | 49870684  | 0.470 |
| OAR14_54195253.1   | 14 | 51284257  | 0.470 |
| OAR4_82770525.1    | 4  | 78021185  | 0.470 |
| OAR16_33519318.1   | 16 | 30886595  | 0.470 |
| OAR20_18651357.1   | 20 | 17800631  | 0.470 |
| OAR2_64231337.1    | 2  | 59762935  | 0.470 |
| OAR3_98987819.1    | 3  | 93260015  | 0.470 |
| OAR3_125653475.1   | 3  | 117778341 | 0.470 |
| OAR8_83458866.1    | 8  | 77347407  | 0.470 |
| DU299931_445.1     | 2  | 81407809  | 0.470 |
| OAR22_22410821.1   | 22 | 18541303  | 0.470 |
| OAR14_27519100.1   | 14 | 26343076  | 0.470 |
| s47338.1           | 1  | 98211805  | 0.469 |
| s05350.1           | 3  | 103599900 | 0.469 |
| OAR1_156714280.1   | 1  | 145180382 | 0.469 |
| OAR16_15458830.1   | 16 | 14215465  | 0.469 |
| OAR8_12209748.1    | 8  | 10901870  | 0.469 |
| s36267.1           | 5  | 88338774  | 0.469 |
| OAR2_66083138.1    | 2  | 61621077  | 0.469 |
| s27329.1           | 23 | 56674506  | 0.469 |
| s62976.1           | 5  | 59530500  | 0.469 |
| OAR2_176738567_X.1 | 2  | 167096123 | 0.469 |
| OAR5_108561009_X.1 | 5  | 99641244  | 0.469 |
| s52058.1           | 7  | 17834128  | 0.469 |
| s23821.1           | 13 | 60895517  | 0.469 |
| OAR23_32551191.1   | 23 | 30870894  | 0.468 |
| OAR2_180985316.1   | 2  | 170652224 | 0.468 |
| OAR18_10826154.1   | 18 | 10853032  | 0.468 |
| OAR5_96757423.1    | 5  | 88720507  | 0.468 |
| OAR11_51856858.1   | 11 | 48848474  | 0.468 |

|                  |    |           |       |
|------------------|----|-----------|-------|
| OAR8_62334652.1  | 8  | 57996793  | 0.468 |
| OAR7_46559347.1  | 7  | 41967369  | 0.468 |
| OAR10_57284787.1 | 10 | 56149162  | 0.468 |
| OAR1_194938697.1 | 1  | 180609768 | 0.468 |
| OAR8_90480980.1  | 8  | 83890608  | 0.468 |
| s21038.1         | 19 | 53584885  | 0.468 |
| OAR5_98847734.1  | 5  | 90613401  | 0.468 |
| OAR2_91638206.1  | 2  | 86164251  | 0.468 |
| OAR10_85485865.1 | 10 | 78296997  | 0.468 |
| s65835.1         | 22 | 18684922  | 0.468 |
| OAR2_239828382.1 | 2  | 227072901 | 0.468 |
| s01546.1         | 7  | 59940866  | 0.468 |
| OAR14_16713218.1 | 14 | 16236771  | 0.468 |
| s47519.1         | 2  | 97741243  | 0.468 |
| OAR6_101315163.1 | 6  | 92343909  | 0.467 |
| OAR8_36508728.1  | 8  | 33855818  | 0.467 |
| OAR7_30442652.1  | 7  | 26745110  | 0.467 |
| OAR3_89860596.1  | 3  | 84911759  | 0.467 |
| OAR23_58632679.1 | 23 | 55141170  | 0.467 |
| OAR1_105078097.1 | 1  | 98412220  | 0.467 |
| OAR3_92868792.1  | 3  | 87710569  | 0.467 |
| OAR6_22138611.1  | 6  | 19161699  | 0.467 |
| s08174.1         | 3  | 65177707  | 0.467 |
| OAR3_152114001.1 | 3  | 142284913 | 0.467 |
| OAR1_86080692.1  | 1  | 80801999  | 0.467 |
| s11162.1         | 17 | 21145424  | 0.467 |
| s10394.1         | 6  | 69005883  | 0.467 |
| OAR2_165417013.1 | 2  | 156001345 | 0.467 |
| s39748.1         | 17 | 65576794  | 0.467 |
| OAR6_6211452.1   | 6  | 4193393   | 0.467 |
| OAR9_99753311.1  | 9  | 93740939  | 0.467 |
| OAR3_233491871.1 | 3  | 215419146 | 0.466 |
| OAR2_205138896.1 | 2  | 193596846 | 0.466 |
| OAR8_31201923.1  | 8  | 28788770  | 0.466 |
| OAR8_67978586.1  | 8  | 63186794  | 0.466 |
| OAR3_138246433.1 | 3  | 129604964 | 0.466 |
| OAR5_94915332.1  | 5  | 86810078  | 0.466 |
| s13775.1         | 12 | 61273373  | 0.466 |
| s15084.1         | 7  | 82932447  | 0.466 |
| OAR16_42184944.1 | 16 | 38878086  | 0.466 |
| s42786.1         | 16 | 38880548  | 0.466 |
| OAR2_132080120.1 | 2  | 123857066 | 0.466 |
| OAR1_144817903.1 | 1  | 133906203 | 0.466 |
| OAR4_93903479.1  | 4  | 88486000  | 0.466 |

|                    |    |           |       |
|--------------------|----|-----------|-------|
| OAR8_14152236_X.1  | 8  | 12602136  | 0.466 |
| OAR16_40846568_X.1 | 16 | 37622186  | 0.466 |
| OAR7_68394178.1    | 7  | 62539269  | 0.466 |
| OAR4_27894204.1    | 4  | 26488638  | 0.465 |
| OAR12_42878639.1   | 12 | 38475442  | 0.465 |
| OAR2_155715202.1   | 2  | 146734798 | 0.465 |
| s60265.1           | 12 | 50581422  | 0.465 |
| OAR5_95001131.1    | 5  | 86902391  | 0.465 |
| OAR21_13268403.1   | 21 | 11717379  | 0.465 |
| s62814.1           | 2  | 191910639 | 0.465 |
| OAR8_13942037.1    | 8  | 12411195  | 0.465 |
| OAR2_128931922.1   | 2  | 120609452 | 0.465 |
| OAR17_33466679.1   | 17 | 30581082  | 0.465 |
| OAR9_32911813.1    | 9  | 31421304  | 0.465 |
| OAR1_27632403.1    | 1  | 27287535  | 0.465 |
| OAR2_237163960.1   | 2  | 224438092 | 0.464 |
| OAR18_58942764.1   | 18 | 55155983  | 0.464 |
| OAR2_63699523.1    | 2  | 59231945  | 0.464 |
| OAR3_82364808.1    | 3  | 77832563  | 0.464 |
| OAR1_198733751.1   | 1  | 184155995 | 0.464 |
| s14823.1           | 19 | 15080853  | 0.464 |
| OAR15_88109218.1   | 15 | 79199919  | 0.464 |
| OAR8_76247205.1    | 8  | 71065708  | 0.464 |
| OAR9_6755588.1     | 9  | 6877914   | 0.464 |
| s58654.1           | 4  | 118489003 | 0.464 |
| OAR2_147550458.1   | 2  | 138951962 | 0.464 |
| s64015.1           | 23 | 46368708  | 0.463 |
| s00904.1           | 9  | 1631021   | 0.463 |
| OAR26_21018684.1   | 26 | 17819004  | 0.463 |
| OAR6_549040.1      | 6  | 795947    | 0.463 |
| s69644.1           | 17 | 8831140   | 0.463 |
| OAR7_53497046.1    | 7  | 48439913  | 0.463 |
| OAR1_60333122.1    | 1  | 57316101  | 0.463 |
| s14360.1           | 4  | 115058153 | 0.463 |
| OAR4_96389676.1    | 4  | 90818623  | 0.463 |
| OAR5_105813966.1   | 5  | 97246551  | 0.463 |
| OAR6_51132829.1    | 6  | 46119077  | 0.463 |
| OAR15_76674101.1   | 15 | 70762081  | 0.463 |
| s18172.1           | 6  | 76487965  | 0.462 |
| OAR23_50421087.1   | 23 | 47553083  | 0.462 |
| OAR8_67122251.1    | 8  | 62326453  | 0.462 |
| s13888.1           | 13 | 67622358  | 0.462 |
| OAR3_125733929.1   | 3  | 117854395 | 0.462 |
| OAR23_9819232.1    | 23 | 8919709   | 0.462 |



|                  |    |           |       |
|------------------|----|-----------|-------|
| OAR7_47757823.1  | 7  | 43098726  | 0.462 |
| OAR23_13573358.1 | 23 | 12431055  | 0.462 |
| s56913.1         | 15 | 54724620  | 0.462 |
| OAR2_23837222.1  | 2  | 23487206  | 0.462 |
| OAR3_152786161.1 | 3  | 142944347 | 0.462 |
| OAR4_96250480.1  | 4  | 90675504  | 0.462 |
| OAR6_109205577.1 | 6  | 99193263  | 0.462 |
| s00799.1         | 4  | 117189277 | 0.462 |
| s19983.1         | 3  | 93879267  | 0.461 |
| s01154.1         | 6  | 45580772  | 0.461 |
| OAR12_47193127.1 | 12 | 42399721  | 0.461 |
| OAR17_23630662.1 | 17 | 21221285  | 0.461 |
| OAR9_83083144.1  | 9  | 78385677  | 0.461 |
| OAR2_47698708.1  | 2  | 45015658  | 0.461 |
| s61648.1         | 12 | 1263847   | 0.460 |
| s10803.1         | 6  | 109626423 | 0.460 |
| OAR16_37419505.1 | 16 | 34392335  | 0.460 |
| OAR23_2760770.1  | 23 | 2494257   | 0.460 |
| s42931.1         | 13 | 80479855  | 0.460 |
| OAR11_3642255.1  | 11 | 4256308   | 0.460 |
| OAR6_37483582.1  | 6  | 33493183  | 0.460 |
| OAR20_46608631.1 | 20 | 42923555  | 0.460 |
| OAR21_47882305.1 | 21 | 43296505  | 0.460 |
| OAR4_62240280.1  | 4  | 58920751  | 0.460 |
| OAR4_92808545.1  | 4  | 87392051  | 0.460 |
| OAR8_13873014.1  | 8  | 12342949  | 0.460 |
| OAR5_55048051.1  | 5  | 50759855  | 0.460 |
| OAR18_10963695.1 | 18 | 10984471  | 0.460 |
| OAR5_23734357.1  | 5  | 21094473  | 0.460 |
| OAR13_26553208.1 | 13 | 24023458  | 0.460 |
| OAR6_24843953.1  | 6  | 21628996  | 0.460 |
| s08197.1         | 25 | 40509990  | 0.460 |
| OAR2_148534584.1 | 2  | 139718962 | 0.460 |
| s26118.1         | 7  | 73668292  | 0.460 |
| OAR8_91660520.1  | 8  | 84997173  | 0.460 |
| OAR6_6157042.1   | 6  | 4155782   | 0.459 |
| OAR26_5770772.1  | 26 | 5131055   | 0.459 |
| OAR16_72384133.1 | 16 | 66579927  | 0.459 |
| s02671.1         | 13 | 65458747  | 0.459 |
| OAR2_132019304.1 | 2  | 123794330 | 0.459 |
| OAR14_39926553.1 | 14 | 38342841  | 0.459 |
| OAR7_54141447.1  | 7  | 49042680  | 0.459 |
| OAR7_17872303.1  | 7  | 17277451  | 0.459 |
| OAR22_48686242.1 | 22 | 43334957  | 0.459 |

|                    |    |           |       |
|--------------------|----|-----------|-------|
| s29856.1           | 5  | 59105733  | 0.459 |
| OAR2_60823920.1    | 2  | 56521561  | 0.459 |
| OAR9_32819540.1    | 9  | 31387692  | 0.459 |
| s64219.1           | 6  | 68696291  | 0.459 |
| OAR14_57968471.1   | 14 | 54802973  | 0.459 |
| OAR1_229636965.1   | 1  | 212888343 | 0.459 |
| OAR8_96572418_X.1  | 8  | 89585108  | 0.458 |
| s57793.1           | 7  | 98610524  | 0.458 |
| s31327.1           | 1  | 262960057 | 0.457 |
| s31340.1           | 15 | 72536427  | 0.457 |
| OAR5_83843279.1    | 5  | 76233696  | 0.457 |
| s33178.1           | 16 | 38899653  | 0.457 |
| s32200.1           | 23 | 12350788  | 0.457 |
| OAR21_13608697.1   | 21 | 11968338  | 0.457 |
| OAR11_11180584.1   | 11 | 11593659  | 0.457 |
| OAR1_175040095.1   | 1  | 162284804 | 0.457 |
| OAR8_12237843.1    | 8  | 10929938  | 0.457 |
| OAR26_30036643.1   | 26 | 25957009  | 0.457 |
| s74514.1           | 2  | 139455644 | 0.457 |
| OAR2_157494688.1   | 2  | 148526445 | 0.457 |
| OAR2_14765360.1    | 2  | 15322091  | 0.457 |
| OAR22_32948290.1   | 22 | 28642922  | 0.456 |
| s46756.1           | 1  | 16465248  | 0.456 |
| OAR1_117214017.1   | 1  | 108415563 | 0.456 |
| OAR5_94841254.1    | 5  | 86740574  | 0.456 |
| OAR1_79619162.1    | 1  | 74416132  | 0.456 |
| OAR1_197390718.1   | 1  | 182941584 | 0.456 |
| s03792.1           | 2  | 132802249 | 0.456 |
| s70896.1           | 3  | 60088420  | 0.456 |
| OAR16_70695201_X.1 | 16 | 64971385  | 0.456 |
| OAR14_16757677.1   | 14 | 16277597  | 0.456 |
| OAR3_150564820.1   | 3  | 140760089 | 0.456 |
| OAR4_100741190.1   | 4  | 95094427  | 0.456 |
| OAR3_27771608.1    | 3  | 25710765  | 0.456 |
| OAR4_46265640.1    | 4  | 43848244  | 0.456 |
| OAR13_60550782.1   | 13 | 55660662  | 0.456 |
| OAR14_53406640.1   | 14 | 50504964  | 0.456 |
| OAR9_82085786.1    | 9  | 77473891  | 0.455 |
| OAR12_43257167.1   | 12 | 38843578  | 0.455 |
| OAR3_96170847.1    | 3  | 90549311  | 0.455 |
| OAR26_16139285.1   | 26 | 13333552  | 0.455 |
| OAR1_52374321.1    | 1  | 50229647  | 0.455 |
| s73482.1           | 23 | 46624328  | 0.455 |
| s62771.1           | 18 | 55537048  | 0.455 |

|                  |    |           |       |
|------------------|----|-----------|-------|
| s53281.1         | 5  | 23299118  | 0.455 |
| OAR2_32564484.1  | 2  | 31388914  | 0.455 |
| OAR8_85517334.1  | 8  | 79239878  | 0.455 |
| OAR1_200228185.1 | 23 | 36481538  | 0.455 |
| OAR21_50331592.1 | 21 | 45332006  | 0.455 |
| OAR2_66155982.1  | 2  | 61697022  | 0.455 |
| OAR5_105969630.1 | 5  | 97402781  | 0.455 |
| s33676.1         | 16 | 66300344  | 0.455 |
| OAR12_46545889.1 | 12 | 41736967  | 0.455 |
| s24872.1         | 7  | 15988141  | 0.455 |
| OAR10_49013559.1 | 10 | 48243886  | 0.455 |
| OAR1_117978374.1 | 1  | 109210933 | 0.455 |
| s42531.1         | 4  | 71870600  | 0.454 |
| OAR4_100777666.1 | 4  | 95130608  | 0.454 |
| s32466.1         | 16 | 9124681   | 0.454 |
| OAR10_71907148.1 | 10 | 69516727  | 0.454 |
| s09080.1         | 1  | 94310141  | 0.454 |
| s74913.1         | 12 | 44629062  | 0.454 |
| OAR2_221490831.1 | 2  | 209225353 | 0.454 |
| OAR4_114714505.1 | 4  | 107255476 | 0.454 |
| OAR12_28746512.1 | 12 | 25268304  | 0.454 |
| OAR4_100712500.1 | 4  | 95065514  | 0.453 |
| OAR1_117268913.1 | 1  | 108471215 | 0.453 |
| OAR18_62399925.1 | 18 | 58389719  | 0.453 |
| s38891.1         | 2  | 233019342 | 0.453 |
| OAR3_80043937.1  | 3  | 75748976  | 0.453 |
| OAR10_22164858.1 | 10 | 22540345  | 0.453 |
| OAR26_40962143.1 | 26 | 36031341  | 0.453 |
| OAR3_150637864.1 | 3  | 140827769 | 0.453 |
| s35389.1         | 19 | 30535888  | 0.453 |
| OAR2_172741598.1 | 2  | 163109337 | 0.453 |
| s48420.1         | 17 | 65744982  | 0.453 |
| OAR2_66203050.1  | 2  | 61743310  | 0.453 |
| s30831.1         | 1  | 176042371 | 0.453 |
| OAR13_35982442.1 | 13 | 32625552  | 0.452 |
| OAR5_96674157.1  | 5  | 88634982  | 0.452 |
| OAR13_36521771.1 | 13 | 33160066  | 0.452 |
| s60859.1         | 9  | 31944220  | 0.452 |
| OAR22_48982599.1 | 22 | 43619480  | 0.452 |
| s57130.1         | 4  | 24036246  | 0.452 |
| s17757.1         | 11 | 8134841   | 0.452 |
| s20463.1         | 21 | 29230702  | 0.452 |
| s21984.1         | 13 | 81611070  | 0.452 |
| s07075.1         | 12 | 56285258  | 0.452 |

|                    |    |           |       |
|--------------------|----|-----------|-------|
| OAR3_24844330.1    | 3  | 23079743  | 0.452 |
| OAR11_50922447.1   | 11 | 47935334  | 0.452 |
| OAR1_30673378.1    | 1  | 30096508  | 0.452 |
| s61866.1           | 7  | 11801898  | 0.452 |
| s46382.1           | 16 | 39157118  | 0.451 |
| s39907.1           | 10 | 80450776  | 0.451 |
| OAR15_22368903.1   | 15 | 21448285  | 0.451 |
| OAR14_37445471.1   | 14 | 35992007  | 0.451 |
| OAR1_172390718.1   | 1  | 159827512 | 0.451 |
| s44523.1           | 2  | 23355101  | 0.451 |
| OAR2_177639830.1   | 2  | 167885360 | 0.451 |
| OAR1_105916901.1   | 1  | 98698690  | 0.451 |
| OAR8_89506288.1    | 8  | 82987574  | 0.451 |
| OAR16_59388986.1   | 16 | 54486204  | 0.451 |
| OAR13_16924382.1   | 13 | 11955869  | 0.451 |
| OAR15_18385515_X.1 | 15 | 17824040  | 0.451 |
| OAR2_75637263.1    | 2  | 70976797  | 0.451 |
| OAR13_33896421.1   | 13 | 30733899  | 0.451 |
| OAR1_107103247.1   | 1  | 99799572  | 0.451 |
| s31260.1           | 14 | 39415649  | 0.451 |
| s52289.1           | 9  | 16197331  | 0.450 |
| OAR8_58215143.1    | 8  | 54310629  | 0.450 |
| s35197.1           | 11 | 30193254  | 0.450 |
| s17924.1           | 5  | 16729235  | 0.450 |
| OAR5_94876397.1    | 5  | 86770859  | 0.450 |
| OAR16_43833978.1   | 16 | 40339621  | 0.450 |
| OAR8_50989547.1    | 8  | 47509991  | 0.450 |
| OAR4_41399083.1    | 4  | 39299669  | 0.450 |
| OAR23_61577887.1   | 23 | 57787391  | 0.450 |
| s02221.1           | 15 | 13271015  | 0.450 |
| s23190.1           | 2  | 248504893 | 0.450 |
| OAR10_91658465.1   | 10 | 84029946  | 0.449 |
| OAR2_180239034.1   | 2  | 170195998 | 0.449 |
| OAR25_31629845.1   | 25 | 30273221  | 0.449 |
| OAR5_104240083.1   | 5  | 95687342  | 0.449 |
| s68251.1           | 2  | 170303370 | 0.449 |
| OAR2_69526155.1    | 2  | 65040471  | 0.449 |
| s18550.1           | 7  | 15995141  | 0.449 |
| OAR19_17575750.1   | 19 | 16820490  | 0.449 |
| OAR1_140939577.1   | 1  | 130124668 | 0.449 |
| OAR4_48684803.1    | 4  | 45967609  | 0.449 |
| OAR18_20633775.1   | 18 | 20134921  | 0.449 |
| s03306.1           | 2  | 2765814   | 0.449 |
| OAR19_56538781_X.1 | 19 | 53499133  | 0.449 |

|                  |    |           |       |
|------------------|----|-----------|-------|
| OAR3_170807307.1 | 3  | 159692296 | 0.449 |
| s16744.1         | 15 | 24083295  | 0.449 |
| OAR25_31677314.1 | 25 | 30315848  | 0.449 |
| OAR6_55349679.1  | 6  | 50058344  | 0.449 |
| OAR9_42902329.1  | 9  | 40868212  | 0.449 |
| OAR16_42312325.1 | 16 | 38943467  | 0.449 |
| OAR7_80500931.1  | 7  | 73648676  | 0.449 |
| OAR3_207738289.1 | 3  | 193035777 | 0.449 |
| s03705.1         | 25 | 40993152  | 0.449 |
| OAR14_53138348.1 | 14 | 50238610  | 0.449 |
| OAR4_100874235.1 | 4  | 95225295  | 0.448 |
| OAR9_93788043.1  | 9  | 88282528  | 0.448 |
| OAR3_169198367.1 | 3  | 158111043 | 0.448 |
| s57119.1         | 5  | 50782236  | 0.448 |
| s23222.1         | 12 | 40442151  | 0.448 |
| s23129.1         | 14 | 6208692   | 0.448 |
| OAR2_34301332.1  | 2  | 32988451  | 0.448 |
| s64925.1         | 22 | 43571769  | 0.448 |
| OAR1_145462895.1 | 1  | 134460874 | 0.448 |
| OAR5_96703012.1  | 5  | 88661821  | 0.448 |
| OAR1_42933481.1  | 1  | 41456605  | 0.448 |
| OAR23_9715053.1  | 23 | 8805942   | 0.448 |
| s51183.1         | 10 | 13338205  | 0.448 |
| s61729.1         | 6  | 45439964  | 0.448 |
| OAR2_166400154.1 | 2  | 156985451 | 0.448 |
| s71447.1         | 1  | 29110758  | 0.447 |
| s72656.1         | 9  | 93799321  | 0.447 |
| OAR3_150573902.1 | 3  | 140766356 | 0.447 |
| s40920.1         | 17 | 28931348  | 0.447 |
| OAR2_236249490.1 | 2  | 223460997 | 0.447 |
| OAR16_27136698.1 | 16 | 24968600  | 0.447 |
| OAR24_8989305.1  | 24 | 7833106   | 0.447 |
| OAR3_92984654.1  | 3  | 87822190  | 0.447 |
| OAR19_40904872.1 | 19 | 38977959  | 0.447 |
| OAR8_27648193.1  | 8  | 25218113  | 0.447 |
| s44871.1         | 6  | 6497783   | 0.447 |
| s16440.1         | 7  | 43245323  | 0.447 |
| OAR6_50222315.1  | 6  | 45296994  | 0.447 |
| OAR15_11973263.1 | 15 | 12052518  | 0.447 |
| s61859.1         | 25 | 31037322  | 0.446 |
| DU352764_273.1   | 15 | 50813916  | 0.446 |
| OAR7_1181460_X.1 | 7  | 1482274   | 0.446 |
| OAR15_87912118.1 | 15 | 78941317  | 0.446 |
| s55008.1         | 1  | 225356104 | 0.446 |

|                    |    |           |       |
|--------------------|----|-----------|-------|
| OAR15_67212591.1   | 15 | 61815728  | 0.446 |
| OAR3_127680786.1   | 3  | 119882148 | 0.446 |
| OAR5_40166532_X.1  | 5  | 36419513  | 0.446 |
| OAR3_152083446.1   | 3  | 142253982 | 0.446 |
| OAR25_13419677.1   | 25 | 13140616  | 0.446 |
| OAR10_49548443.1   | 10 | 48775457  | 0.446 |
| OAR8_18043643.1    | 8  | 16168861  | 0.446 |
| OAR19_37314076_X.1 | 19 | 35573209  | 0.446 |
| OAR16_9947075.1    | 16 | 9075249   | 0.446 |
| OAR21_28535197.1   | 21 | 25559077  | 0.446 |
| s71238.1           | 15 | 13649195  | 0.446 |
| OAR1_297285976.1   | 1  | 274755523 | 0.446 |
| OAR9_87478637.1    | 9  | 82682823  | 0.445 |
| OAR1_228489740.1   | 1  | 211846418 | 0.445 |
| OAR8_58181648_X.1  | 8  | 54280168  | 0.445 |
| s28234.1           | 1  | 109063783 | 0.445 |
| OAR12_49617704.1   | 12 | 44709450  | 0.445 |
| OAR3_151929197.1   | 3  | 142109502 | 0.445 |
| OAR8_27161632.1    | 8  | 24707933  | 0.445 |
| DU461176_154.1     | 1  | 99896856  | 0.445 |
| OAR1_65028926.1    | 1  | 61397709  | 0.445 |
| s41022.1           | 2  | 32893038  | 0.445 |
| s32732.1           | 2  | 127997234 | 0.445 |
| OAR24_42952578.1   | 24 | 39735778  | 0.445 |
| OAR15_87315790.1   | 15 | 78695106  | 0.445 |
| OAR20_46680243.1   | 20 | 43001737  | 0.445 |
| OAR3_232125965.1   | 3  | 214149668 | 0.445 |
| OAR6_91292213.1    | 6  | 83562872  | 0.445 |
| OAR26_36231458.1   | 26 | 31875529  | 0.445 |
| s61320.1           | 3  | 7192808   | 0.445 |
| OAR2_12469561.1    | 2  | 13078663  | 0.445 |
| s05045.1           | 24 | 32800970  | 0.444 |
| OAR6_26128546.1    | 6  | 22846685  | 0.444 |
| OAR16_31817206.1   | 16 | 29276425  | 0.444 |
| OAR17_9821235.1    | 17 | 8860722   | 0.444 |
| s73069.1           | 19 | 56309709  | 0.444 |
| OAR19_46545362.1   | 19 | 44209101  | 0.444 |
| OAR22_43835577.1   | 22 | 38924538  | 0.444 |
| OAR3_45394131.1    | 3  | 42398511  | 0.444 |
| OAR13_70805821.1   | 13 | 65720624  | 0.444 |
| OAR25_43096371.1   | 25 | 40766187  | 0.444 |
| s08584.1           | 2  | 230323317 | 0.444 |
| OAR1_79688436.1    | 1  | 74482904  | 0.444 |
| OAR18_26087486.1   | 18 | 25173878  | 0.444 |

|                    |    |           |       |
|--------------------|----|-----------|-------|
| OAR12_35168968.1   | 12 | 31357766  | 0.444 |
| OAR1_245302998.1   | 1  | 227692672 | 0.443 |
| s64023.1           | 5  | 16746930  | 0.443 |
| s10057.1           | 17 | 60654434  | 0.443 |
| s29197.1           | 2  | 149380990 | 0.443 |
| OAR5_104210549.1   | 5  | 95657941  | 0.443 |
| s47946.1           | 6  | 113881838 | 0.443 |
| OAR23_64564298_X.1 | 23 | 60640087  | 0.443 |
| OAR16_33630679.1   | 16 | 30990027  | 0.443 |
| OAR2_153419559.1   | 2  | 144500078 | 0.443 |
| OAR16_23680997.1   | 16 | 21654029  | 0.443 |
| OAR2_165344428.1   | 2  | 155927328 | 0.443 |
| OAR1_162623538.1   | 1  | 151186242 | 0.443 |
| OAR8_60730321.1    | 8  | 56705959  | 0.443 |
| OAR21_13212843.1   | 21 | 11660892  | 0.443 |
| OAR26_36202800.1   | 26 | 31846749  | 0.443 |
| s70624.1           | 7  | 21143650  | 0.443 |
| OAR8_64834575.1    | 8  | 60187369  | 0.443 |
| OAR5_75165666.1    | 5  | 68452787  | 0.443 |
| OAR3_80182465_X.1  | 3  | 75884007  | 0.442 |
| OAR10_10291004.1   | 10 | 11898594  | 0.442 |
| s59454.1           | 2  | 45320994  | 0.442 |
| OAR2_42769211.1    | 2  | 40931803  | 0.442 |
| OAR2_165244995.1   | 2  | 155833687 | 0.442 |
| s60284.1           | 9  | 16127970  | 0.442 |
| OAR9_41187686.1    | 9  | 39227808  | 0.442 |
| OAR1_44241542.1    | 1  | 42737432  | 0.442 |
| OAR4_31128826.1    | 4  | 29612213  | 0.442 |
| OAR1_29872607.1    | 1  | 29252531  | 0.442 |
| OAR17_25364030.1   | 17 | 22962508  | 0.442 |
| OAR3_134747538.1   | 3  | 126318550 | 0.442 |
| OAR6_111022637.1   | 6  | 100900651 | 0.442 |
| OAR3_152630913.1   | 3  | 142796592 | 0.442 |
| s31264.1           | 17 | 28940958  | 0.442 |
| OAR3_226847164.1   | 3  | 209183837 | 0.442 |
| OAR6_44623765.1    | 6  | 39938674  | 0.442 |
| OAR2_142646641.1   | 2  | 134194138 | 0.441 |
| OAR6_67252446.1    | 6  | 61030506  | 0.441 |
| OAR21_14165572.1   | 21 | 12497679  | 0.441 |
| s18057.1           | 5  | 59379940  | 0.441 |
| OAR20_49399263.1   | 20 | 45375105  | 0.441 |
| OAR19_46813773.1   | 19 | 44497170  | 0.441 |
| OAR1_52048533.1    | 1  | 49897092  | 0.441 |
| OAR3_57464855.1    | 3  | 54343038  | 0.441 |

|                    |    |           |       |
|--------------------|----|-----------|-------|
| OAR1_52263906.1    | 1  | 50120343  | 0.441 |
| OAR3_33093517.1    | 3  | 30928786  | 0.441 |
| s41451.1           | 13 | 80946897  | 0.441 |
| OAR26_41166096.1   | 26 | 36242897  | 0.441 |
| OAR2_172802190.1   | 2  | 163170710 | 0.441 |
| OAR11_11214325.1   | 11 | 11626457  | 0.441 |
| OAR8_68261335.1    | 8  | 63473370  | 0.441 |
| OAR3_19685356.1    | 3  | 18172749  | 0.441 |
| s04976.1           | 5  | 16754839  | 0.441 |
| OAR2_172603349.1   | 2  | 162861327 | 0.441 |
| s03686.1           | 25 | 7517270   | 0.441 |
| OAR4_11532952.1    | 4  | 11380946  | 0.441 |
| OAR20_50828611.1   | 20 | 46721819  | 0.440 |
| OAR19_10882333.1   | 19 | 10566691  | 0.440 |
| OAR1_45835401.1    | 1  | 44262410  | 0.440 |
| OAR3_93551207.1    | 3  | 88334095  | 0.440 |
| OAR7_53605138.1    | 7  | 48549329  | 0.440 |
| OAR25_43145095.1   | 25 | 40811951  | 0.440 |
| OAR15_76321531.1   | 15 | 70393057  | 0.440 |
| s33336.1           | 7  | 73552515  | 0.440 |
| OAR6_19886420.1    | 6  | 16969882  | 0.440 |
| s60824.1           | 17 | 63386591  | 0.440 |
| OAR19_42032872.1   | 2  | 109369155 | 0.440 |
| OAR10_22217205.1   | 10 | 22592412  | 0.440 |
| s66980.1           | 18 | 59441058  | 0.440 |
| OAR12_42546972.1   | 12 | 38183659  | 0.440 |
| s05734.1           | 9  | 93860515  | 0.440 |
| OAR22_10565085_X.1 | 22 | 8826614   | 0.440 |
| OAR18_31974215.1   | 18 | 30706077  | 0.439 |
| OAR1_197593478.1   | 1  | 183138836 | 0.439 |
| OAR4_49971009.1    | 4  | 47250555  | 0.439 |
| OAR8_48160033.1    | 8  | 44692215  | 0.439 |
| s37245.1           | 10 | 84297326  | 0.439 |
| OAR15_81048498.1   | 15 | 74752130  | 0.439 |
| s53597.1           | 1  | 109095881 | 0.439 |
| OAR3_53590166.1    | 3  | 50888555  | 0.439 |
| OAR3_151903542.1   | 3  | 142083071 | 0.439 |
| OAR3_170924636.1   | 3  | 159795155 | 0.439 |
| OAR3_79278326.1    | 3  | 75052306  | 0.439 |
| s07077.1           | 3  | 221505368 | 0.439 |
| s28123.1           | 16 | 2423854   | 0.439 |
| OAR10_24711066.1   | 10 | 24801456  | 0.439 |
| s44288.1           | 22 | 49544771  | 0.439 |
| s41716.1           | 1  | 2317262   | 0.439 |



|                  |    |           |       |
|------------------|----|-----------|-------|
| s75594.1         | 8  | 72484617  | 0.438 |
| s12247.1         | 23 | 2672488   | 0.438 |
| OAR8_3874844.1   | 8  | 3585887   | 0.438 |
| OAR18_32432472.1 | 18 | 31052392  | 0.438 |
| OAR2_13874225.1  | 2  | 14459533  | 0.438 |
| s39037.1         | 3  | 4382555   | 0.438 |
| OAR11_36045417.1 | 11 | 33722495  | 0.438 |
| OAR21_13084748.1 | 21 | 11522332  | 0.438 |
| OAR6_21601091.1  | 6  | 18643578  | 0.438 |
| OAR25_37588149.1 | 25 | 35798667  | 0.438 |
| OAR22_48945901.1 | 22 | 43582702  | 0.438 |
| s06116.1         | 1  | 101820263 | 0.438 |
| OAR2_23807521.1  | 2  | 23460849  | 0.438 |
| OAR23_32628025.1 | 23 | 30945890  | 0.438 |
| s72805.1         | 15 | 27396963  | 0.438 |
| s22326.1         | 7  | 21169136  | 0.438 |
| OAR13_73958074.1 | 13 | 68764851  | 0.438 |
| OAR1_45559516.1  | 1  | 44026375  | 0.438 |
| OAR3_84222063.1  | 3  | 79661259  | 0.438 |
| s61400.1         | 2  | 26600287  | 0.438 |
| s20556.1         | 2  | 162869558 | 0.438 |
| OAR1_7104917.1   | 1  | 7578311   | 0.438 |
| OAR21_50378541.1 | 21 | 45368906  | 0.438 |
| OAR8_68313375.1  | 8  | 63526260  | 0.438 |
| OAR17_67050348.1 | 17 | 61492873  | 0.438 |
| OAR6_44395905.1  | 6  | 39713559  | 0.438 |
| OAR6_65181728.1  | 6  | 59199571  | 0.437 |
| OAR3_149319006.1 | 3  | 139533299 | 0.437 |
| OAR4_25328239.1  | 4  | 24165394  | 0.437 |
| OAR12_28755835.1 | 12 | 25277611  | 0.437 |
| OAR24_8655784.1  | 24 | 7564606   | 0.437 |
| s30887.1         | 26 | 708531    | 0.437 |
| OAR14_2036727.1  | 14 | 1558966   | 0.437 |
| s43969.1         | 3  | 103380239 | 0.437 |
| DU522140_165.1   | 15 | 34491899  | 0.437 |
| OAR6_105017216.1 | 6  | 95681155  | 0.437 |
| s72376.1         | 12 | 77206908  | 0.437 |
| s71394.1         | 3  | 154790327 | 0.437 |
| s13949.1         | 17 | 17005027  | 0.437 |
| s23051.1         | 26 | 5223244   | 0.437 |
| OAR17_9513319.1  | 17 | 8557131   | 0.437 |
| OAR6_27236488.1  | 6  | 23853685  | 0.437 |
| OAR4_48939856.1  | 4  | 46229465  | 0.437 |
| OAR17_24080832.1 | 17 | 21571728  | 0.437 |

|                    |    |           |       |
|--------------------|----|-----------|-------|
| s51090.1           | 2  | 233988816 | 0.437 |
| OAR9_4225646.1     | 9  | 4328654   | 0.436 |
| OAR9_989389.1      | 9  | 1262953   | 0.436 |
| OAR16_32336229.1   | 16 | 29759501  | 0.436 |
| OAR1_64635180.1    | 1  | 61082391  | 0.436 |
| OAR10_19965597.1   | 10 | 20482744  | 0.436 |
| OAR3_79784642.1    | 3  | 75514641  | 0.436 |
| OAR3_79793003.1    | 3  | 75519294  | 0.436 |
| OAR1_244882421.1   | 1  | 227308647 | 0.436 |
| OAR1_3066756.1     | 1  | 3839440   | 0.436 |
| s72169.1           | 5  | 21030271  | 0.436 |
| OAR18_49779319.1   | 18 | 46758665  | 0.436 |
| s50496.1           | 22 | 18733992  | 0.436 |
| s40052.1           | 7  | 54608877  | 0.436 |
| OAR13_80941028.1   | 13 | 75240652  | 0.436 |
| s34856.1           | 5  | 85338509  | 0.435 |
| OAR26_14345999_X.1 | 26 | 11684825  | 0.435 |
| s37981.1           | 23 | 46362141  | 0.435 |
| OAR23_63000790.1   | 23 | 59097813  | 0.435 |
| s25952.1           | 13 | 17962348  | 0.435 |
| OAR3_195730138.1   | 3  | 181711513 | 0.435 |
| OAR15_23429119.1   | 15 | 22506656  | 0.435 |
| OAR25_6573369.1    | 25 | 6973999   | 0.435 |
| OAR13_20943553.1   | 13 | 18571666  | 0.435 |
| OAR16_43363065.1   | 16 | 39864135  | 0.435 |
| s31181.1           | 2  | 61578504  | 0.435 |
| s01043.1           | 2  | 138371374 | 0.435 |
| OAR3_152425395.1   | 3  | 142599802 | 0.434 |
| OAR3_195520988.1   | 3  | 181549208 | 0.434 |
| s49313.1           | 19 | 44067296  | 0.434 |
| s11647.1           | 18 | 31799928  | 0.434 |
| OAR3_204945666.1   | 3  | 190346801 | 0.434 |
| OAR12_46438220.1   | 12 | 41684287  | 0.434 |
| OAR3_233296350.1   | 3  | 215226320 | 0.434 |
| OAR7_48061232_X.1  | 7  | 43372429  | 0.434 |
| OAR10_71855989.1   | 10 | 69465074  | 0.434 |
| s20006.1           | 21 | 12424303  | 0.434 |
| s60293.1           | 11 | 47717468  | 0.434 |
| s69919.1           | 8  | 71118274  | 0.434 |
| OAR4_74410532.1    | 4  | 70335607  | 0.434 |
| OAR1_245443477.1   | 1  | 227831862 | 0.433 |
| OAR6_98017695.1    | 6  | 89417212  | 0.433 |
| OAR9_64800745_X.1  | 9  | 61661127  | 0.433 |
| OAR7_90813398.1    | 7  | 83429307  | 0.433 |

|                    |    |           |       |
|--------------------|----|-----------|-------|
| s06722.1           | 3  | 14225212  | 0.433 |
| OAR6_55321610.1    | 6  | 50026392  | 0.433 |
| OAR8_44629587.1    | 8  | 41538911  | 0.433 |
| s54366.1           | 13 | 32716917  | 0.433 |
| s14318.1           | 3  | 217757756 | 0.433 |
| OAR23_48878158.1   | 23 | 46167308  | 0.433 |
| OAR13_74505755.1   | 13 | 69243196  | 0.433 |
| OAR1_116671699.1   | 1  | 107866754 | 0.433 |
| s58438.1           | 5  | 95280484  | 0.433 |
| OAR15_69700846_X.1 | 15 | 64145404  | 0.433 |
| OAR2_145478943.1   | 2  | 136780869 | 0.433 |
| OAR19_2409205.1    | 19 | 2286216   | 0.433 |
| OAR9_38221892.1    | 9  | 36285902  | 0.433 |
| OAR2_41879685.1    | 2  | 40205877  | 0.433 |
| OAR21_2979332.1    | 21 | 2297354   | 0.433 |
| s16798.1           | 19 | 11145254  | 0.433 |
| s35301.1           | 3  | 217881782 | 0.433 |
| OAR2_215596955.1   | 2  | 203751286 | 0.432 |
| s70130.1           | 5  | 50882591  | 0.432 |
| OAR15_87285774.1   | 15 | 78663623  | 0.432 |
| OAR3_79085072.1    | 3  | 74879524  | 0.432 |
| s16895.1           | 5  | 23139577  | 0.432 |
| OAR9_97923017_X.1  | 9  | 92020509  | 0.432 |

---

**Table S4. Annotation of a SNP which both have high  $F_{ST}$  and XPEHH value**

| SNP-ID           | Chromosome | Position  | $F_{ST}$<br>(Top 0.01) | XPEHH<br>(Top 0.05) | Gene     | SNP within gene |
|------------------|------------|-----------|------------------------|---------------------|----------|-----------------|
| OAR1_45270297.1  | 1          | 43681990  | 0.291                  | 0.491               | DEPDC1   |                 |
| s17708.1         | 1          | 53355068  | 0.243                  | 0.570               | AK5      | AK5             |
| s17708.1         | 1          | 53355068  | 0.243                  | 0.570               | ZZZ3     |                 |
| s66349.1         | 1          | 68199001  | 0.289                  | 0.521               | TGFBR3   | TGFBR3          |
| s55347.1         | 1          | 183336939 | 0.443                  | 0.813               | GPR156   |                 |
| OAR1_197916874.1 | 1          | 183420073 | 0.360                  | 0.960               | FSTL1    |                 |
| OAR1_197916874.1 | 1          | 183420073 | 0.360                  | 0.960               | LRRC58   |                 |
| DU464218_590.1   | 1          | 183575060 | 0.255                  | 0.859               | NDUFB4   |                 |
| OAR1_249572898.1 | 1          | 231602195 | 0.246                  | 0.634               | ARHGEF26 | ARHGEF26        |
| OAR1_268122939.1 | 1          | 248275678 | 0.280                  | 0.612               | PRR23B   |                 |
| OAR1_281649480.1 | 1          | 260317241 | 0.278                  | 0.492               | ZNF295   | ZNF295          |
| s42972.1         | 1          | 261414809 | 0.346                  | 0.490               | CRYAA    |                 |
| s42972.1         | 1          | 261414809 | 0.346                  | 0.490               | U2AF1    | U2AF1           |
| OAR2_12469561.1  | 2          | 13078663  | 0.245                  | 0.445               | AKAP2    |                 |
| OAR2_12469561.1  | 2          | 13078663  | 0.245                  | 0.445               | C9ORF152 |                 |
| OAR2_40373894.1  | 2          | 38795830  | 0.243                  | 0.508               | DPYSL2   |                 |
| OAR2_61008309.1  | 2          | 56714900  | 0.371                  | 0.771               | TLE4     | TLE4            |
| OAR2_63274739.1  | 2          | 58896602  | 0.245                  | 0.541               | GNA14    |                 |
| OAR2_63274739.1  | 2          | 58896602  | 0.245                  | 0.541               | VPS13A   | VPS13A          |
| OAR2_63781435.1  | 2          | 59306755  | 0.260                  | 0.513               | PRUNE2   | PRUNE2          |
| OAR2_77016276.1  | 2          | 72254024  | 0.256                  | 0.476               | SLC1A1   |                 |
| OAR2_142646641.1 | 2          | 134194138 | 0.270                  | 0.441               | CHN1     |                 |
| OAR2_142646641.1 | 2          | 134194138 | 0.270                  | 0.441               | CHRNA1   |                 |
| s44712.1         | 2          | 135753568 | 0.248                  | 0.577               | MLTK     |                 |
| s44712.1         | 2          | 135753568 | 0.248                  | 0.577               | RAPGEF4  | RAPGEF4         |
| OAR2_155715202.1 | 2          | 146734798 | 0.266                  | 0.465               | DPP4     |                 |
| OAR2_155715202.1 | 2          | 146734798 | 0.266                  | 0.465               | SLC4A10  | SLC4A10         |
| s44167.1         | 2          | 243153063 | 0.316                  | 0.544               | EPHA8    | EPHA8           |
| s44167.1         | 2          | 243153063 | 0.316                  | 0.544               | ZBTB40   |                 |
| s08514.1         | 3          | 39851694  | 0.464                  | 1.185               | CNRIP1   |                 |
| s08514.1         | 3          | 39851694  | 0.464                  | 1.185               | PLEK     |                 |
| OAR3_42729807.1  | 3          | 39986491  | 0.317                  | 1.618               | PNO1     |                 |
| OAR3_42729807.1  | 3          | 39986491  | 0.317                  | 1.618               | PPP3R1   | PPP3R1          |
| OAR3_42907435.1  | 3          | 40163832  | 0.422                  | 1.828               | WDR92    | WDR92           |
| OAR3_53590166.1  | 3          | 50888555  | 0.273                  | 0.439               | CTNNA2   | CTNNA2          |
| s19512.1         | 3          | 76037302  | 0.276                  | 0.694               | FOXN2    |                 |
| OAR3_82409790.1  | 3          | 77879156  | 0.329                  | 0.693               | EPAS1    |                 |
| OAR3_96170847.1  | 3          | 90549311  | 0.279                  | 0.455               | LTBP1    | LTBP1           |
| OAR3_98710538.1  | 3          | 93004742  | 0.378                  | 0.752               | ANKRD53  |                 |
| OAR3_98710538.1  | 3          | 93004742  | 0.378                  | 0.752               | NAGK     | NAGK            |

|                   |   |           |       |       |          |          |
|-------------------|---|-----------|-------|-------|----------|----------|
| OAR3_98710538.1   | 3 | 93004742  | 0.378 | 0.752 | PAIP2B   |          |
| OAR3_98710538.1   | 3 | 93004742  | 0.378 | 0.752 | TEX261   |          |
| s67952.1          | 3 | 93522006  | 0.533 | 0.743 | DYSF     | DYSF     |
| OAR3_138331159.1  | 3 | 129685397 | 0.262 | 0.624 | MRPL42   |          |
| s71169.1          | 3 | 129759745 | 0.451 | 0.546 | CRADD    |          |
| s71169.1          | 3 | 129759745 | 0.451 | 0.546 | SOCS2    |          |
| OAR3_195730138.1  | 3 | 181711513 | 0.307 | 0.435 | PKP2     | PKP2     |
| s54635.1          | 3 | 214112448 | 0.263 | 0.793 | DDX17    |          |
| s54635.1          | 3 | 214112448 | 0.263 | 0.793 | KCNJ4    |          |
| s54635.1          | 3 | 214112448 | 0.263 | 0.793 | KDEL3    |          |
| OAR4_10748026.1   | 4 | 10609123  | 0.362 | 0.809 | CCDC132  | CCDC132  |
| OAR4_25295648.1   | 4 | 24132337  | 0.313 | 0.702 | MEOX2    | MEOX2    |
| OAR4_73786063.1   | 4 | 69811362  | 0.317 | 0.688 | NFE2L3   | NFE2L3   |
| OAR4_91329005.1   | 4 | 85930010  | 0.332 | 0.761 | FAM3C    | FAM3C    |
| s11336.1          | 4 | 87572495  | 0.349 | 0.583 | SLC13A1  |          |
| s56763.1          | 5 | 15912332  | 0.357 | 0.759 | ACSBG2   |          |
| s67679.1          | 5 | 16017146  | 0.325 | 1.212 | RANBP3   |          |
| s67679.1          | 5 | 16017146  | 0.325 | 1.212 | RFX2     |          |
| s29567.1          | 5 | 16203101  | 0.251 | 1.175 | DUS3L    |          |
| s29567.1          | 5 | 16203101  | 0.251 | 1.175 | PRR22    |          |
| s07332.1          | 5 | 16209393  | 0.300 | 1.217 | HSD11B1L |          |
| s07332.1          | 5 | 16209393  | 0.300 | 1.217 | LONP1    | LONP1    |
| s07332.1          | 5 | 16209393  | 0.300 | 1.217 | QILI     |          |
| s07332.1          | 5 | 16209393  | 0.300 | 1.217 | RPL36    |          |
| s07332.1          | 5 | 16209393  | 0.300 | 1.217 | SAFB     |          |
| s07332.1          | 5 | 16209393  | 0.300 | 1.217 | TMEM146  |          |
| s38680.1          | 5 | 16520048  | 0.295 | 0.874 | PTPRS    |          |
| s16895.1          | 5 | 23139577  | 0.278 | 0.432 | FBN2     | FBN2     |
| s07518.1          | 5 | 58793978  | 0.256 | 0.494 | HMGXB3   |          |
| s07518.1          | 5 | 58793978  | 0.256 | 0.494 | PDE6A    |          |
| s07518.1          | 5 | 58793978  | 0.256 | 0.494 | SLC26A2  |          |
| s07518.1          | 5 | 58793978  | 0.256 | 0.494 | TIGD6    |          |
| OAR5_87409839_X.1 | 5 | 79542631  | 0.320 | 0.814 | ALDH1L2  | ALDH1L2  |
| OAR5_87409839_X.1 | 5 | 79542631  | 0.320 | 0.814 | ATG10    | ATG10    |
| OAR5_87409839_X.1 | 5 | 79542631  | 0.320 | 0.814 | ATP6AP1L | ATP6AP1L |
| OAR5_87409839_X.1 | 5 | 79542631  | 0.320 | 0.814 | RPS23    |          |
| s61354.1          | 5 | 90586440  | 0.378 | 0.574 | FAM172A  | FAM172A  |
| OAR6_67376317.1   | 6 | 61138606  | 0.405 | 0.532 | SHISA3   |          |
| s14577.1          | 7 | 26755264  | 0.420 | 0.574 | FMN1     | FMN1     |
| OAR7_47161420.1   | 7 | 42551974  | 0.313 | 0.772 | ZNF609   | ZNF609   |
| OAR7_61660987.1   | 7 | 55726352  | 0.262 | 0.504 | DMXL2    |          |
| OAR7_61660987.1   | 7 | 55726352  | 0.262 | 0.504 | SCG3     |          |
| OAR8_51076568.1   | 8 | 47596948  | 0.319 | 0.703 | MDN1     | MDN1     |
| OAR8_60234503.1   | 8 | 56216655  | 0.330 | 0.676 | EPB41L2  | EPB41L2  |

|                  |    |          |       |       |           |           |
|------------------|----|----------|-------|-------|-----------|-----------|
| s14938.1         | 9  | 795580   | 0.358 | 0.677 | KCNQ5     | KCNQ5     |
| OAR9_1718056.1   | 9  | 2004658  | 0.245 | 0.697 | RIMS1     | RIMS1     |
| s66058.1         | 9  | 32100676 | 0.286 | 0.769 | KIAA0146  | KIAA0146  |
| OAR9_38221892.1  | 9  | 36285902 | 0.398 | 0.433 | SDR16C5   |           |
| OAR9_38221892.1  | 9  | 36285902 | 0.398 | 0.433 | SDR16C6   |           |
| OAR9_82428531.1  | 9  | 77756891 | 0.333 | 0.745 | VPS13B    | VPS13B    |
| OAR10_28149069.1 | 10 | 28136160 | 0.264 | 0.631 | CFDP2     |           |
| OAR10_28149069.1 | 10 | 28136160 | 0.264 | 0.631 | STARD13   | STARD13   |
| s71442.1         | 10 | 82994149 | 0.290 | 0.855 | ABHD13    |           |
| s71442.1         | 10 | 82994149 | 0.290 | 0.855 | LIG4      |           |
| s71442.1         | 10 | 82994149 | 0.290 | 0.855 | TNFSF13B  |           |
| OAR11_3180902.1  | 11 | 3834100  | 0.278 | 0.569 | RPL3      |           |
| OAR11_6228500.1  | 11 | 6725442  | 0.291 | 0.524 | ANKFN1    | ANKFN1    |
| OAR11_18711856.1 | 11 | 18335747 | 0.538 | 0.507 | EVI2A     |           |
| OAR11_18711856.1 | 11 | 18335747 | 0.538 | 0.507 | EVI2B     |           |
| OAR11_18711856.1 | 11 | 18335747 | 0.538 | 0.507 | OMG       |           |
| OAR11_18823250.1 | 11 | 18440783 | 0.464 | 0.534 | NF1       | NF1       |
| s33957.1         | 11 | 41563065 | 0.261 | 0.611 | ACLY      | ACLY      |
| s33957.1         | 11 | 41563065 | 0.261 | 0.611 | CNP       |           |
| s33957.1         | 11 | 41563065 | 0.261 | 0.611 | KLHL10    |           |
| s33957.1         | 11 | 41563065 | 0.261 | 0.611 | KLHL11    | KLHL11    |
| s33957.1         | 11 | 41563065 | 0.261 | 0.611 | TTC25     |           |
| s27209.1         | 12 | 68444880 | 0.405 | 0.477 | RPS6KC1   |           |
| OAR13_2388727.1  | 13 | 1861848  | 0.338 | 0.483 | PLCB4     | PLCB4     |
| OAR13_36331465.1 | 13 | 32978582 | 0.298 | 0.890 | ZEB1      | ZEB1      |
| s39564.1         | 13 | 43797381 | 0.337 | 0.618 | KLF6      |           |
| s18401.1         | 13 | 65660964 | 0.293 | 0.619 | C20ORF132 | C20ORF132 |
| s18401.1         | 13 | 65660964 | 0.293 | 0.619 | RBL1      |           |
| s18401.1         | 13 | 65660964 | 0.293 | 0.619 | RPN2      |           |
| s46185.1         | 13 | 78420224 | 0.316 | 0.705 | DPM1      |           |
| s46185.1         | 13 | 78420224 | 0.316 | 0.705 | KCNG1     |           |
| s46185.1         | 13 | 78420224 | 0.316 | 0.705 | MOCS3     |           |
| OAR14_39926553.1 | 14 | 38342841 | 0.248 | 0.459 | DHX38     |           |
| OAR14_39926553.1 | 14 | 38342841 | 0.248 | 0.459 | HP        | HP        |
| OAR14_39926553.1 | 14 | 38342841 | 0.248 | 0.459 | PKD1L3    |           |
| OAR14_39926553.1 | 14 | 38342841 | 0.248 | 0.459 | PMFBP1    |           |
| OAR14_39926553.1 | 14 | 38342841 | 0.248 | 0.459 | TXNL4B    |           |
| OAR15_22404265.1 | 15 | 21482600 | 0.315 | 0.650 | PPP2R1B   |           |
| OAR15_22404265.1 | 15 | 21482600 | 0.315 | 0.650 | SIK2      | SIK2      |
| OAR15_53721488.1 | 15 | 49215124 | 0.332 | 0.572 | OR52K1    |           |
| s31340.1         | 15 | 72536427 | 0.411 | 0.457 | ALX4      |           |
| s31340.1         | 15 | 72536427 | 0.411 | 0.457 | EXT2      | EXT2      |
| OAR16_27229721.1 | 16 | 25021431 | 0.276 | 0.662 | ARL15     | ARL15     |
| OAR17_31561091.1 | 17 | 28790576 | 0.292 | 0.628 | EIF1      |           |

|                  |    |          |       |       |           |         |
|------------------|----|----------|-------|-------|-----------|---------|
| OAR17_31561091.1 | 17 | 28790576 | 0.292 | 0.628 | PHF17     |         |
| OAR17_31561091.1 | 17 | 28790576 | 0.292 | 0.628 | SFT2D1    |         |
| OAR17_44358460.1 | 17 | 41064820 | 0.292 | 0.561 | HNRNPK    |         |
| OAR19_14489436.1 | 19 | 13918425 | 0.332 | 0.628 | ULK4      | ULK4    |
| s32677.1         | 19 | 31833784 | 0.261 | 0.641 | MITF      |         |
| OAR19_46690670.1 | 19 | 44350807 | 0.249 | 0.625 | ARHGEF3   |         |
| OAR19_46690670.1 | 19 | 44350807 | 0.249 | 0.625 | C3ORF63   | C3ORF63 |
| OAR19_46690670.1 | 19 | 44350807 | 0.249 | 0.625 | CCDC66    |         |
| OAR19_60184770.1 | 19 | 56634864 | 0.307 | 0.593 | PPARG     |         |
| OAR21_50378541.1 | 21 | 45368906 | 0.378 | 0.438 | MTL5      |         |
| OAR21_50378541.1 | 21 | 45368906 | 0.378 | 0.438 | PPP6R3    | PPP6R3  |
| OAR22_34323192.1 | 22 | 29843623 | 0.330 | 0.599 | MXI1      |         |
| OAR22_34323192.1 | 22 | 29843623 | 0.330 | 0.599 | SMNDC1    |         |
| s19461.1         | 22 | 39739539 | 0.362 | 0.616 | WDR11     |         |
| OAR22_45509727.1 | 22 | 40482146 | 0.456 | 0.829 | FGFR2     | FGFR2   |
| s64015.1         | 23 | 46368708 | 0.267 | 0.463 | LOXHD1    |         |
| s64015.1         | 23 | 46368708 | 0.267 | 0.463 | RNF165    |         |
| s42703.1         | 25 | 17652415 | 0.256 | 0.472 | C10ORF107 |         |
| s42703.1         | 25 | 17652415 | 0.256 | 0.472 | OR9Q1     | OR9Q1   |
| OAR25_32156972.1 | 25 | 30802961 | 0.268 | 0.473 | DUSP13    |         |
| OAR25_32156972.1 | 25 | 30802961 | 0.268 | 0.473 | SAMD8     | SAMD8   |
| OAR25_32156972.1 | 25 | 30802961 | 0.268 | 0.473 | VDAC2     |         |
| s67284.1         | 25 | 40426700 | 0.247 | 0.566 | WAPAL     |         |
| OAR26_16139285.1 | 26 | 13333552 | 0.246 | 0.455 | STOX2     | STOX2   |

---

**Table S5. Annotation of a SNP which just have high  $F_{ST}$  value**

| SNP-ID           | Chromosome | Position  | $F_{ST}$ | XPEHH | Gene     | SNP within gene |
|------------------|------------|-----------|----------|-------|----------|-----------------|
| OAR13_52482285.1 | 13         | 49006951  | 0.775    | -     | PPP1CC   |                 |
| OAR13_52630089.1 | 13         | 49140884  | 0.745    | -     | MUTED    | MUTED           |
| OAR4_72720594.1  | 4          | 68754789  | 0.722    | -     | RPS18    |                 |
| OAR3_165009241.1 | 3          | 154213690 | 0.671    | -     | MSRB3    | MSRB3           |
| OAR4_72568832.1  | 4          | 68601186  | 0.657    | -     | HIBADH   |                 |
| OAR11_27654920.1 | 11         | 26421905  | 0.480    | -     | ALOX12   | ALOX12          |
| OAR11_27654920.1 | 11         | 26421905  | 0.480    | -     | BCL6B    |                 |
| OAR11_27654920.1 | 11         | 26421905  | 0.480    | -     | CLEC10A  |                 |
| OAR11_27654920.1 | 11         | 26421905  | 0.480    | -     | RNASEK   |                 |
| OAR11_27654920.1 | 11         | 26421905  | 0.480    | -     | SLC16A11 |                 |
| OAR11_27654920.1 | 11         | 26421905  | 0.480    | -     | SLC16A13 |                 |
| OAR11_27654920.1 | 11         | 26421905  | 0.480    | -     | SOD1     |                 |
| OAR4_73050615.1  | 4          | 69082247  | 0.466    | -     | SKAP2    |                 |
| OAR6_92321965.1  | 6          | 84350628  | 0.392    | -     | UGT2B4   |                 |
| OAR6_92321965.1  | 6          | 84350628  | 0.392    | -     | UGT2B7   | UGT2B7          |
| s58920.1         | 17         | 52092174  | 0.364    | -     | PITPNM2  |                 |
| OAR10_37157671.1 | 10         | 36385864  | 0.350    | -     | ZMYM5    |                 |
| OAR3_200888015.1 | 3          | 186673626 | 0.347    | -     | PTHLH    |                 |
| OAR7_63342726.1  | 7          | 57353770  | 0.335    | -     | ATP8B4   | ATP8B4          |
| OAR1_130003540.1 | 1          | 119845352 | 0.328    | -     | ATP5O    |                 |
| OAR1_130003540.1 | 1          | 119845352 | 0.328    | -     | ITSN1    |                 |
| s12884.1         | 13         | 62857560  | 0.324    | -     | RALY     | RALY            |
| OAR17_67295616.1 | 17         | 61733069  | 0.310    | -     | CLDN6    |                 |
| OAR17_67295616.1 | 17         | 61733069  | 0.310    | -     | NAA25    | NAA25           |
| OAR17_67295616.1 | 17         | 61733069  | 0.310    | -     | TRAFD1   |                 |
| s08464.1         | 24         | 35991517  | 0.307    | -     | MEPCE    |                 |
| s08464.1         | 24         | 35991517  | 0.307    | -     | PILRA    |                 |
| s08464.1         | 24         | 35991517  | 0.307    | -     | RAN      |                 |
| s08464.1         | 24         | 35991517  | 0.307    | -     | TSC22D4  |                 |
| s08464.1         | 24         | 35991517  | 0.307    | -     | ZCWPW1   |                 |
| s24597.1         | 14         | 49053815  | 0.304    | -     | LTBP4    | LTBP4           |
| s24597.1         | 14         | 49053815  | 0.304    | -     | NUMBL    |                 |
| s24597.1         | 14         | 49053815  | 0.304    | -     | SPTBN4   |                 |
| OAR18_27752153.1 | 18         | 26754749  | 0.303    | -     | TRPM1    | TRPM1           |
| s50255.1         | 3          | 220327385 | 0.301    | -     | WNT7B    |                 |
| s01490.1         | 3          | 180726856 | 0.299    | -     | CARD10   | CARD10          |
| s01490.1         | 3          | 180726856 | 0.299    | -     | MFNG     |                 |
| OAR2_156184412.1 | 2          | 147210213 | 0.299    | -     | PSMD14   |                 |
| OAR2_156184412.1 | 2          | 147210213 | 0.299    | -     | TBR1     |                 |
| OAR3_112640501.1 | 3          | 105894007 | 0.289    | -     | ANAPC1   | ANAPC1          |
| s51044.1         | 3          | 7462549   | 0.288    | -     | CCBL1    |                 |



|                  |    |           |       |   |         |         |
|------------------|----|-----------|-------|---|---------|---------|
| s51044.1         | 3  | 7462549   | 0.288 | - | DOLK    |         |
| s51044.1         | 3  | 7462549   | 0.288 | - | LRRC8A  | LRRC8A  |
| s51044.1         | 3  | 7462549   | 0.288 | - | NUP188  |         |
| s51044.1         | 3  | 7462549   | 0.288 | - | PHYHD1  |         |
| s49314.1         | 7  | 57002225  | 0.277 | - | GABPB1  |         |
| s49314.1         | 7  | 57002225  | 0.277 | - | HDC     | HDC     |
| s49314.1         | 7  | 57002225  | 0.277 | - | SLC27A2 |         |
| OAR1_177805968.1 | 1  | 164847462 | 0.277 | - | CCDC137 | CCDC137 |
| OAR5_22783606.1  | 5  | 20089099  | 0.277 | - | ACSL6   | ACSL6   |
| OAR5_22783606.1  | 5  | 20089099  | 0.277 | - | FNIP1   |         |
| s71728.1         | 17 | 71871881  | 0.274 | - | HIRA    |         |
| s71728.1         | 17 | 71871881  | 0.274 | - | MRPL40  | MRPL40  |
| s71728.1         | 17 | 71871881  | 0.274 | - | UFD1L   |         |
| s28647.1         | 10 | 36317262  | 0.264 | - | GJA3    |         |
| s28647.1         | 10 | 36317262  | 0.264 | - | GJB2    |         |
| s28647.1         | 10 | 36317262  | 0.264 | - | ZMYM2   | ZMYM2   |
| s25289.1         | 4  | 68802676  | 0.264 | - | EVX1    |         |
| s25289.1         | 4  | 68802676  | 0.264 | - | HOXA11  |         |
| OAR6_40370293.1  | 6  | 36155169  | 0.262 | - | HERC3   | HERC3   |
| OAR6_40370293.1  | 6  | 36155169  | 0.262 | - | HERC5   |         |
| OAR6_40370293.1  | 6  | 36155169  | 0.262 | - | PREY    |         |
| s51433.1         | 17 | 12876687  | 0.261 | - | ABCE1   |         |
| s51433.1         | 17 | 12876687  | 0.261 | - | ANAPC10 |         |
| s51433.1         | 17 | 12876687  | 0.261 | - | OTUD4   | OTUD4   |
| OAR21_45614480.1 | 21 | 41348152  | 0.260 | - | ATL3    |         |
| OAR21_45614480.1 | 21 | 41348152  | 0.260 | - | RTN3    | RTN3    |
| OAR7_63814443.1  | 7  | 57875478  | 0.258 | - | FGF7    | FGF7    |
| OAR14_46482530.1 | 14 | 44143535  | 0.258 | - | GPI     |         |
| OAR14_46482530.1 | 14 | 44143535  | 0.258 | - | PDCD2L  |         |
| OAR14_46482530.1 | 14 | 44143535  | 0.258 | - | UBA2    | UBA2    |
| OAR14_46482530.1 | 14 | 44143535  | 0.258 | - | WTIP    |         |
| s10721.1         | 4  | 94145887  | 0.257 | - | CPA1    |         |
| s10721.1         | 4  | 94145887  | 0.257 | - | CPA4    |         |
| s10721.1         | 4  | 94145887  | 0.257 | - | CPA5    | CPA5    |
| s10721.1         | 4  | 94145887  | 0.257 | - | TSGA14  |         |
| OAR7_63960135.1  | 7  | 58027024  | 0.254 | - | COPS2   |         |
| OAR7_63960135.1  | 7  | 58027024  | 0.254 | - | GALK2   | GALK2   |
| s24740.1         | 2  | 110941391 | 0.253 | - | PALLD   | PALLD   |
| OAR15_53192586.1 | 15 | 48728528  | 0.253 | - | OR51E2  |         |
| OAR15_53192586.1 | 15 | 48728528  | 0.253 | - | OR51G1  |         |
| OAR15_53192586.1 | 15 | 48728528  | 0.253 | - | OR51I2  |         |
| OAR15_58554489.1 | 15 | 53412021  | 0.253 | - | UVRAG   | UVRAG   |
| OAR3_200394051.1 | 3  | 186159798 | 0.252 | - | CCDC91  | CCDC91  |

**Table S6. List of a priori function candidate genes**

| # Bos taurus specific gene |         |          |               |         |          |         |
|----------------------------|---------|----------|---------------|---------|----------|---------|
| ABAT                       | CAPN2   | E1B976#  | HBG2          | MMP2    | PLOD3#   | TRH     |
| ACE                        | CASP1   | E1BIF9#  | HBM           | MT3     | PML      | TWIST1# |
| ACTN4                      | CASR#   | E1BP33#  | HBQ1          | MTOR#   | PPARA    | TXN     |
| ADA                        | CAV1    | ECE1     | HBZ           | MYOD1#  | PRKAA1   | TXN2    |
| ADAM17                     | CCL2    | ECSOD#   | HIF1A         | NARFL   | PRKCE#   | TXNDC2  |
| ADAM8#                     | CD34#   | EDN1     | HIF1AN#       | NDRG1#  | PRKCQ    | UBE2B   |
| ADIPOQ                     | CD38    | EDNRA    | HIF3A         | NF1     | PSEN2    | UBQLN1  |
| ADM                        | CDKN1A  | EDNRB    | HMOX1         | NGB     | PTEN     | UCN     |
| ADORA1                     | CFTR    | EGFR     | HMOX2         | NKX3-1# | PTGIS#   | UCN3    |
| ADORA2A                    | CHRNA4  | EGLN1    | HRH1          | NOS1    | PTGS2#   | UCP3    |
| ADORA2B                    | CHRNA7  | EGLN2    | HSD11B2       | NOS2    | PTK2B    | USF1    |
| ADRB1                      | CHRN2   | EGLN3    | HSP90AA1      | NOS3    | PTX3     | VASN#   |
| ADRB2                      | CITED2  | ENG      | HSP90AB1      | NOTCH1# | PYGM     | VEGFA   |
| AGTR1                      | CLDN3   | EP300    | HSP90B1       | NOX4    | RORA     | VHL     |
| AJUBA#                     | CPS1    | EPAS1    | HYOU1         | NPPB    | RORB     | VHLL    |
| AKT1                       | CREBBP  | EPHX2    | ICAM1         | NPPC    | RORC     | VLDLR   |
| AKT2                       | CRYAA#  | EPO      | IFNG          | NPR1    | RYR1     | XRCC1   |
| AKT3                       | CRYAB#  | ERCC3    | IL10          | NQO1    | RYR2     |         |
| ALAS2#                     | CXCR4   | F1MP20#  | IL18          | NR4A2   | SCNN1B   |         |
| ALB                        | CYB5R4  | F1MU57#  | IL1B          | OXTR    | SCNN1G   |         |
| ALDH2                      | CYGB    | F1N5F6#  | INDO          | P02081# | SERPINA1 |         |
| ALDOC                      | CYP17A1 | F6R1H3#  | INS           | P2RX3   | SFRP1#   |         |
| ALKBH5#                    | CYP19A1 | FABP1#   | INSR          | P2RX4   | SHH      |         |
| ANG                        | CYP1A1  | FAM162A# | ITGA1         | PDE5A   | SIRT1#   |         |
| ANG1#                      | CYP1A2  | FAS#     | ITGA2         | PDGFA   | SLC11A2  |         |
| ANGPT1                     | CYP1B1  | FLT1     | ITPR1         | PDGFB   | SLC2A8   |         |
| ANGPTL4                    | CYP26A1 | FRAP1    | ITPR2         | PDGFRA  | SLC8A1   |         |
| APOE                       | CYP2A7  | FUNDC1#  | JAG2          | PDIA2   | SMAD3    |         |
| APOLD1                     | CYP2B6  | G3MXR8#  | JAK2          | PDK1#   | SMAD4    |         |
| AQP1#                      | CYP2C18 | G3MYW0#  | KCNA5         | PDK3#   | SMAD9    |         |
| ARG2                       | CYP2C19 | G3MZ21#  | KCNJ8         | PDLIM1  | SOCS3    |         |
| ARNT                       | CYP2C8  | G3N1Y3#  | KCNMA1        | PDPN    | SOD1     |         |
| ARNT2                      | CYP2C9  | G3N3D8#  | KLRK1         | PGF     | SOD2     |         |
| ASCL2                      | CYP2E1  | G8JKV7#  | KNG1          | PIK3C2A | SOD3     |         |
| ATG5                       | CYP2F1  | GATA6#   | KNG2#         | PIK3C2B | SPR      |         |
| ATP1B1                     | CYP2U1  | GCH1     | LCT           | PIK3C2G | SRF#     |         |
| BACH1#                     | CYP3A4  | GCHFR    | LIMD1#        | PIK3C3  | STAT5B   |         |
| BAD#                       | CYP3A5  | GIMAP1   | LMNA#         | PIK3CA  | TDO2     |         |
| BBS2#                      | CYP3A7  | GIMAP5   | LOC100850173# | PIK3CB  | TFRC     |         |
| BCL2                       | CYP4A11 | GPR182   | LOC784935#    | PIK3CD  | TGFB1    |         |
| BCL2L1                     | CYP4B1  | GPX1     | LONP1         | PIK3CG  | TGFB2    |         |

---

|         |         |         |            |        |        |
|---------|---------|---------|------------|--------|--------|
| BDKRB2# | CYP4F12 | GUCY1A3 | LOXL2#     | PIK3R1 | TGFB3  |
| BIRC2   | CYP4F2  | HAAO    | MB         | PIK3R2 | TGFBR1 |
| BMP2#   | CYP4F3  | HBA#    | MDM2#      | PIK3R3 | TH     |
| BNIP3   | CYP8B1  | HBA1    | MDM4#      | PIP3-E | THBS1  |
| CA9     | DDAH1   | HBB     | MGARP#     | PLAT   | TICAM1 |
| CABC1   | DDAH2   | HBD     | MGC127538# | PLAU   | TNF    |
| CALCA   | DDIT4   | HBE1    | MGC148992# | PLK3#  | TP53#  |
| CALCB   | DPP4    | HBE2#   | MKKS#      | PLOD1  | TPTE   |
| CAMK2D  | DRD1#   | HBE4#   | MMP14      | PLOD2  | TPTE2  |

---

**Table S7. Six hematologic parameters information for TIB and LTH breeds**

| <b>Parameter</b>                                      | <b>TIB(male)<br/>(n=16)</b> | <b>TIB(female)<br/>(n=14)</b> | <b>LTH(male)<br/>(n=16)</b> | <b>LTH(female)<br/>(n=15)</b> |
|-------------------------------------------------------|-----------------------------|-------------------------------|-----------------------------|-------------------------------|
| Red blood cell (RBC)(10 <sup>6</sup> /ul)             | 9.69±1.37 <sup>a</sup>      | 10.3±1.64 <sup>a</sup>        | 10.77±1.85 <sup>a</sup>     | 10.66±1.55 <sup>a</sup>       |
| Hemoglobin (HGB)(g/L)                                 | 106.38±12.25 <sup>a</sup>   | 110.29±13.56 <sup>a</sup>     | 101.25±17.82 <sup>a</sup>   | 100.33±14.34 <sup>a</sup>     |
| Hematocrit (HCT)(%)                                   | 33.93±3.31 <sup>a</sup>     | 34.57±3.47 <sup>a</sup>       | 32.12±5.47 <sup>a</sup>     | 31.51±4.75 <sup>a</sup>       |
| Mean corpuscular volume (MCV)(fl)                     | 35.28±2.63 <sup>a</sup>     | 33.99±3.35 <sup>a</sup>       | 29.88±1.48 <sup>b</sup>     | 29.64±1.66 <sup>b</sup>       |
| Mean corpuscular hemoglobin (MCH)(pg)                 | 11.02±0.62 <sup>a</sup>     | 10.79±0.8 <sup>a</sup>        | 9.43±0.47 <sup>b</sup>      | 9.45±0.43 <sup>b</sup>        |
| Mean corpuscular hemoglobin concentration (MCHC)(g/L) | 313±13.59 <sup>a</sup>      | 318.21±10.87 <sup>a</sup>     | 315.19±8.67 <sup>a</sup>    | 318.8±6.76 <sup>a</sup>       |

Note: The means with the same letter within the same row are not significantly different ( P > 0.05)

**Table S8. Summary of variation consequences in EPAS1 gene**

| <b>ID</b> | <b>Chr:position(bp)</b> | <b>Exon</b> | <b>Alternative nucleotides</b> | <b>Amino acid(AA)</b> | <b>AA coordinate</b> |         |
|-----------|-------------------------|-------------|--------------------------------|-----------------------|----------------------|---------|
| No.1      | 77888694                | 13          | T/C                            | AGT/AGC               | S/P                  | 423     |
| No.2      | 77888602                | 13          | A/G                            | CTA/CTG               | L                    | 453     |
| No.3      | 77888574                | 13          | A/G                            | AGC/GCC               | A/T                  | 463     |
| No.4      | 77888547-77888533       | 13          | INS[AGC]                       |                       | SSSSS/SSSSSS         | 471-476 |
| No.5      | 77886512                | 15          | G/A                            | GAG/GAA               | E                    | 547     |
| No.6      | 77886491                | 15          | G/C                            | CCG/CCC               | P                    | 554     |
| No.7      | 77886337                | 15          | T/C                            | TTC/CTC               | F/L                  | 606     |
| No.8      | 77886329                | 15          | C/T                            | GAC/GAT               | D                    | 608     |
| No.9      | 77884639                | 16          | G/A                            | GAG/GAA               | E                    | 714     |
| No.10     | 77884311                | 17          | C/T                            | GAC/GAT               | D                    | 758     |
| No.11     | 77881491                | 19          | C/T                            |                       |                      |         |
| No.12     | 77881485                | 19          | G/A                            |                       |                      |         |

**Table S9. The MAF and X<sup>2</sup> for each locus of TIB and LTH breed**

| ID    | TIB      |         |         |                              |              | LTH      |         |         |                              |              | X-squared | p-value |
|-------|----------|---------|---------|------------------------------|--------------|----------|---------|---------|------------------------------|--------------|-----------|---------|
|       | Genotype |         |         | Minor Allele Frequency (MAF) | H-W(P-value) | Genotype |         |         | Minor Allele Frequency (MAF) | H-W(P-value) |           |         |
| No.1  | 29 (TT)  | 1 (TC)  | - (CC)  | 0.02                         | 0.01 (0.93)  | 13 (TT)  | 15 (TC) | 3 (CC)  | 0.34                         | 0.2 (0.66)   | 21.3346   | 0.0000  |
| No.2  | 26 (AA)  | 3 (AG)  | 1 (GG)  | 0.08                         | 3.58 (0.06)  | 11 (AA)  | 15 (AG) | 5 (GG)  | 0.40                         | 0 (0.98)     | 16.7359   | 0.0002  |
| No.3  | 1 (AA)   | 2 (AG)  | 27 (GG) | 0.07                         | 6.47 (0.01)  | - (AA)   | 4 (AG)  | 27 (GG) | 0.06                         | 0.15 (0.7)   | 1.6507    | 0.4381  |
| No.4  | 26 (WW)  | 3 (WI)  | 1 (II)  | 0.08                         | 3.58 (0.06)  | 27 (WW)  | 4 (WI)  | - (II)  | 0.06                         | 0.15 (0.7)   | 1.1456    | 0.5639  |
| No.5  | 28 (GG)  | 2 (GA)  | - (AA)  | 0.03                         | 0.04 (0.85)  | 11 (GG)  | 15 (GA) | 5 (AA)  | 0.40                         | 0 (0.98)     | 22.341    | 0.0000  |
| No.6  | 29 (GG)  | 1 (GC)  | - (CC)  | 0.02                         | 0.01 (0.93)  | 27 (GG)  | 4 (GC)  | - (CC)  | 0.06                         | 0.15 (0.7)   | 0.8017    | 0.3706  |
| No.7  | 29 (TT)  | 1 (TC)  | - (CC)  | 0.02                         | 0.01 (0.93)  | 27 (TT)  | 4 (TC)  | - (CC)  | 0.06                         | 0.15 (0.7)   | 0.8017    | 0.3706  |
| No.8  | 23 (CC)  | 5 (CT)  | 2 (TT)  | 0.15                         | 3.6 (0.06)   | 19 (CC)  | 12 (CT) | - (TT)  | 0.19                         | 1.79 (0.18)  | 5.2483    | 0.0725  |
| No.9  | - (GG)   | 5 (GA)  | 25 (AA) | 0.08                         | 0.25 (0.62)  | - (GG)   | - (GA)  | 31 (AA) | -                            | -            | 3.631     | 0.0567  |
| No.10 | 23 (CC)  | 5 (CT)  | 2 (TT)  | 0.15                         | 3.6 (0.06)   | 20 (CC)  | 11 (CT) | - (TT)  | 0.18                         | 1.44 (0.23)  | 3.2041    | 0.2015  |
| No.11 | 6 (CC)   | 16 (CT) | 8 (TT)  | 0.47                         | 0.15 (0.7)   | 18 (CC)  | 10 (CT) | 3 (TT)  | 0.26                         | 0.77 (0.38)  | 6.216     | 0.0447  |
| No.12 | 12 (GG)  | 15 (GA) | 3 (AA)  | 0.35                         | 0.29 (0.59)  | 20 (GG)  | 10 (GA) | 1 (AA)  | 0.19                         | 0.03 (0.85)  | 3.9847    | 0.1364  |

**Table S10. PCR primers used in this study**

| <b>primer name</b> | <b>Sequence</b>       | <b>Production length (bp)</b> |
|--------------------|-----------------------|-------------------------------|
| EPAS1F1            | gcacctggcacctttcac    | 289                           |
| EPAS1R1            | atccctgggtcctcaaaatc  |                               |
| EPAS1F2            | ggcagtgatgttctggagact | 300                           |
| EPAS1R2            | tcctgcgtgtgagaactcg   |                               |
| EPAS1F3            | cacccectgtctttccag    | 697                           |
| EPAS1R3            | ggaaagaaacacaccgaaaa  |                               |
| EPAS1F4            | ccactacccttctccatcca  | 392                           |
| EPAS1R4            | accacaggcacaaccacag   |                               |
| EPAS1F5            | atccccaccttgctttt     | 213                           |
| EPAS1R5            | ccttctcaccggtcacattt  |                               |
| EPAS1F6            | gcttctctcgttgaccttg   | 1388                          |
| EPAS1R6            | gagaaggtacacggcagctc  |                               |
| EPAS1F7            | cgtgttcttgagaagccaca  | 1446                          |
| EPAS1R7            | ggtaaagcagaaggcagacg  |                               |
| EPAS1F8            | ccactgctgagctgctttg   | 587                           |
| EPAS1R8            | agtgggcacctgtctgtacc  |                               |
| EPAS1F9            | ctctcacgccactctctct   | 939                           |
| EPAS1R9            | gctgagatctgccaccttc   |                               |
| EPAS1F10           | cacggttgattcagggttt   | 566                           |
| EPAS1R10           | aaggcgaacaaacgtacacc  |                               |

$$\text{Delta K} = \text{mean}(|L''(K)|) / \text{sd}(L(K))$$

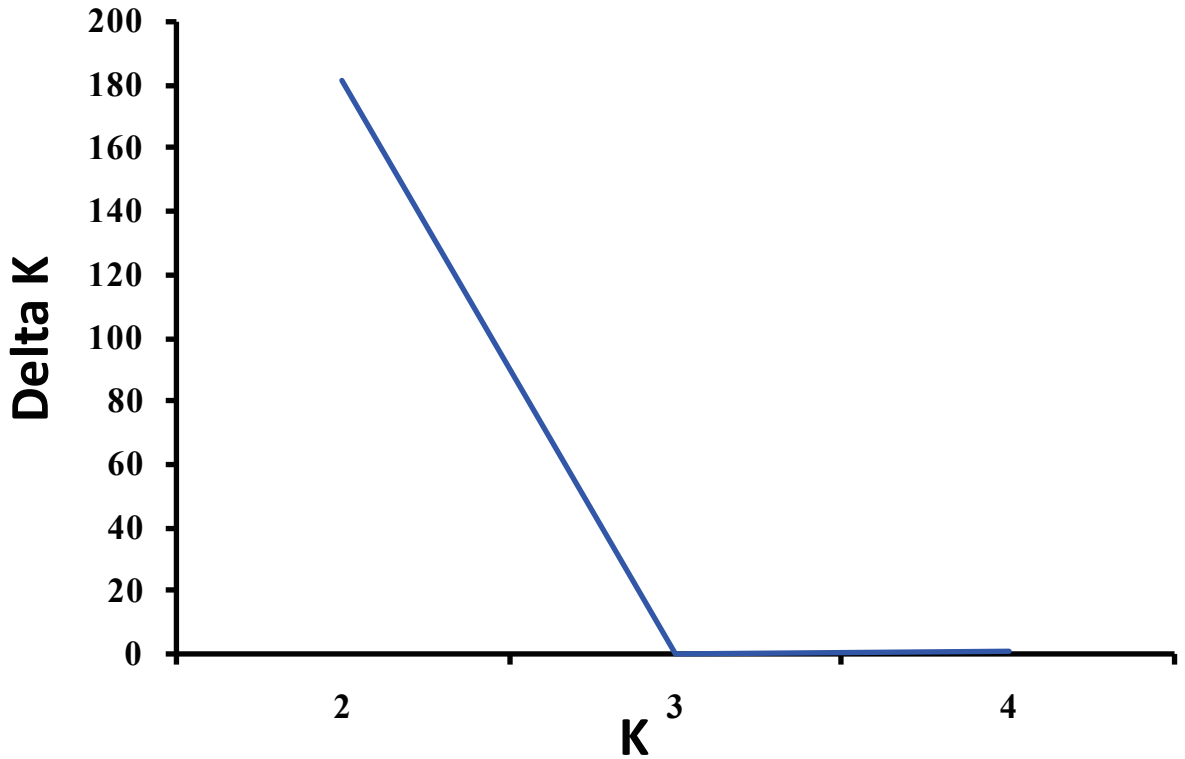

Figure S1. Mean  $L(K)$  ( $\pm$ SD) for each K value



K=2

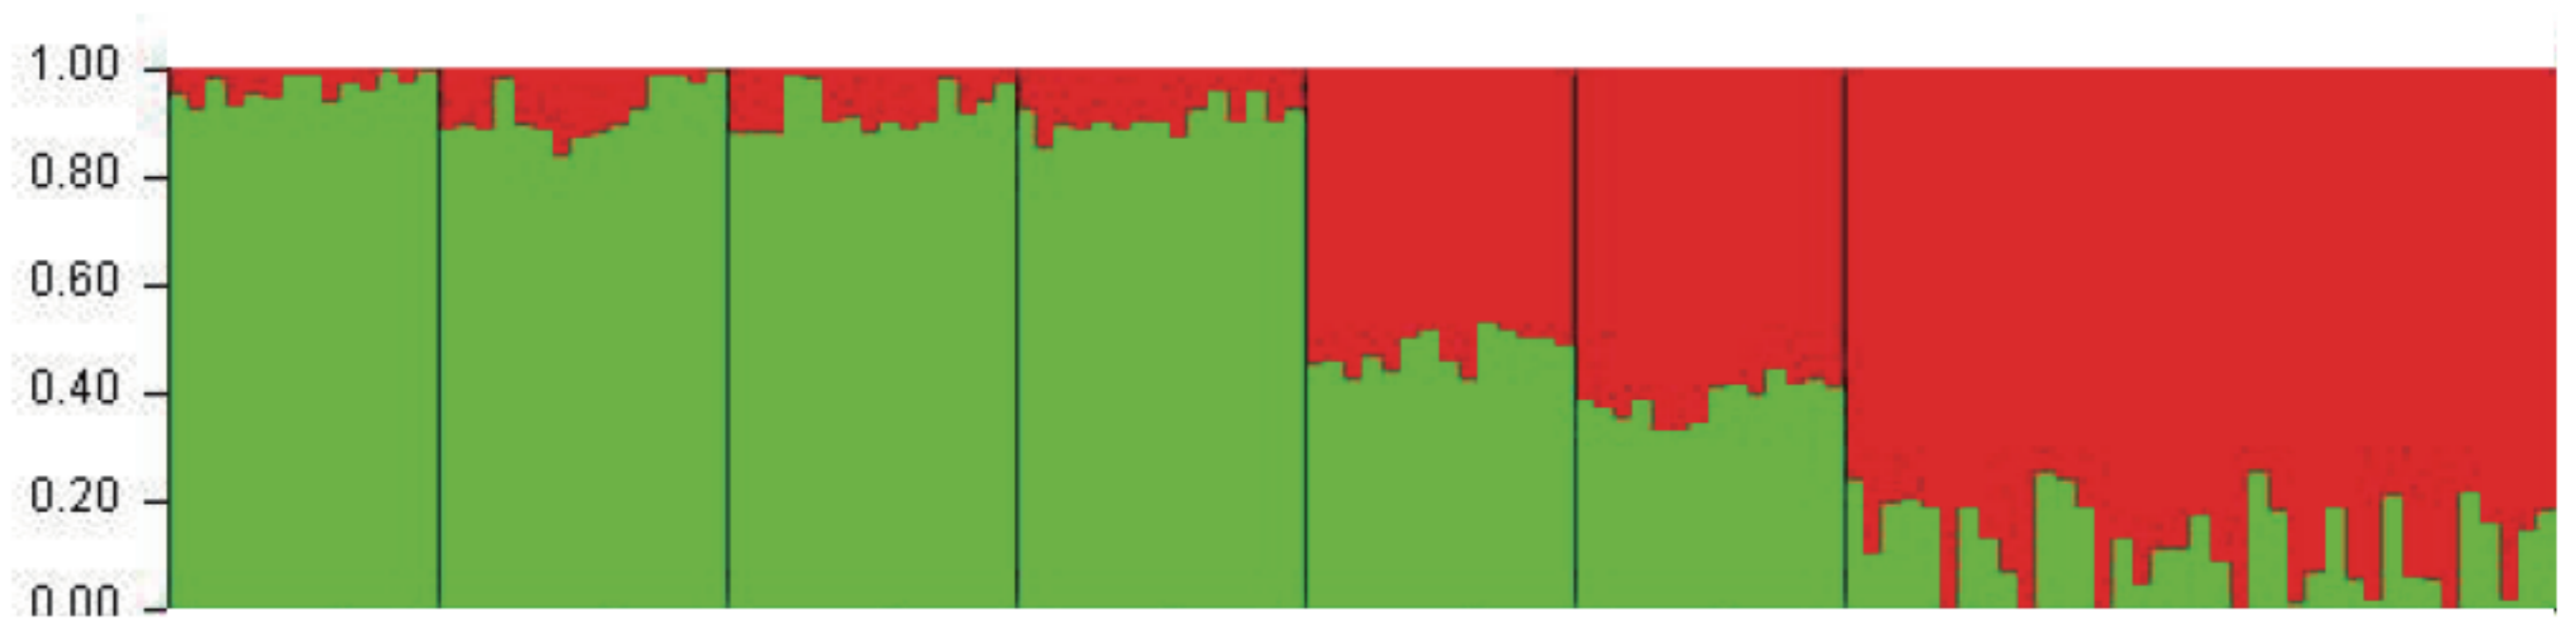

K=3

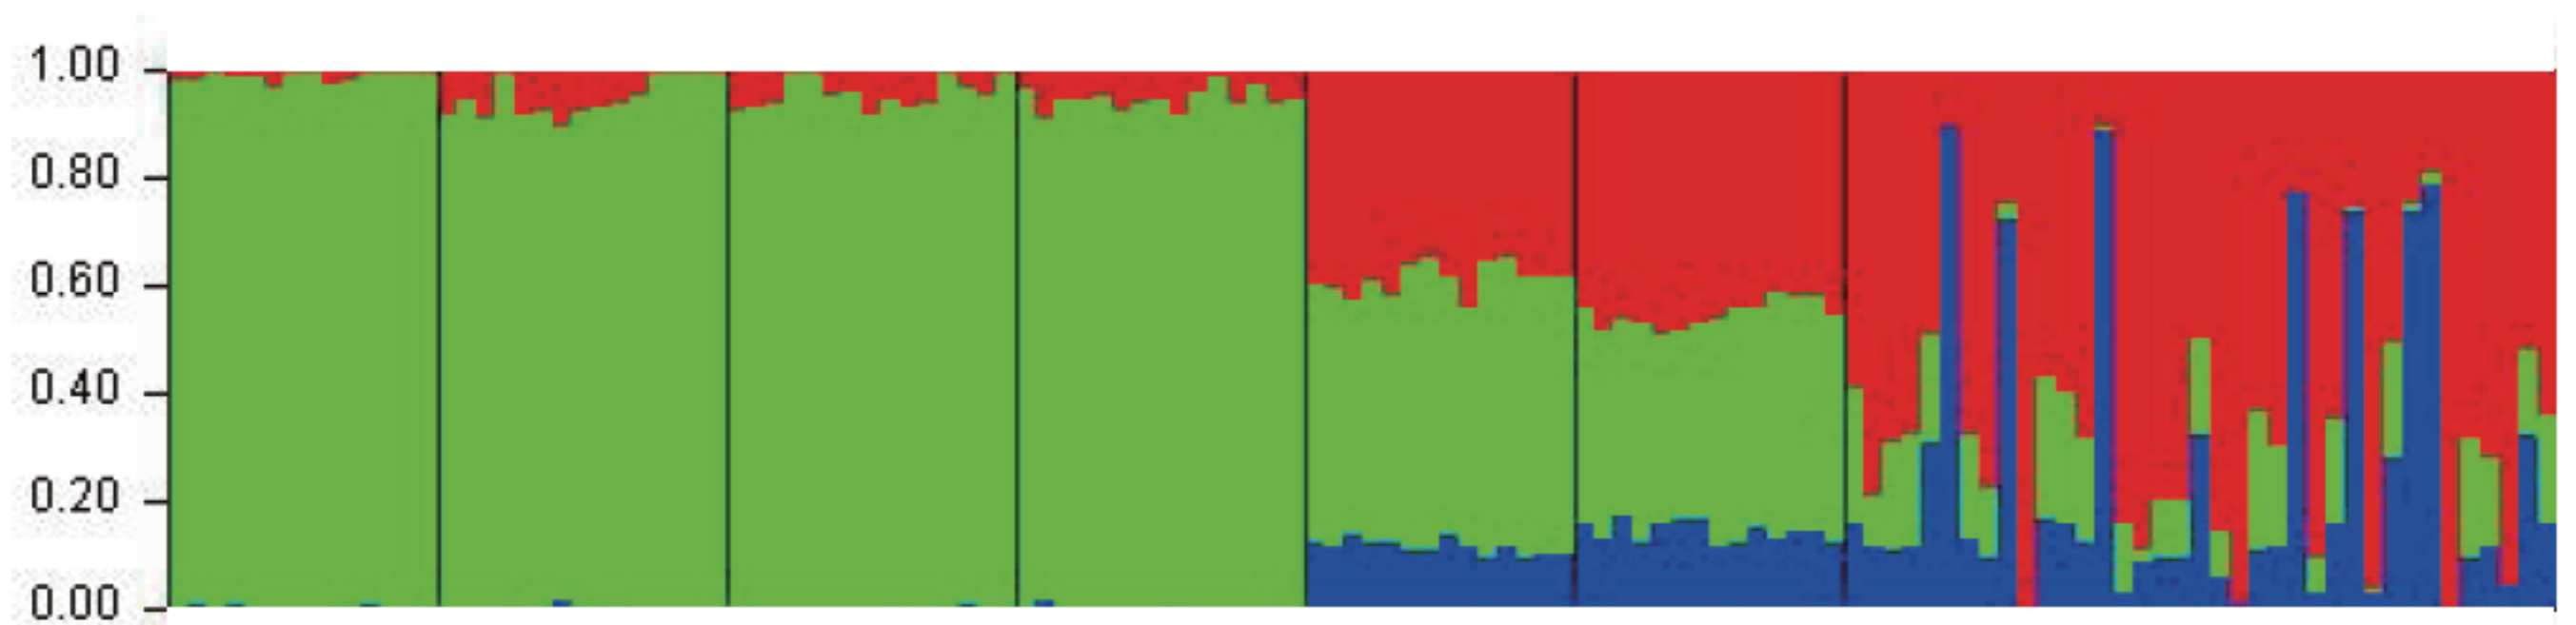

K=4

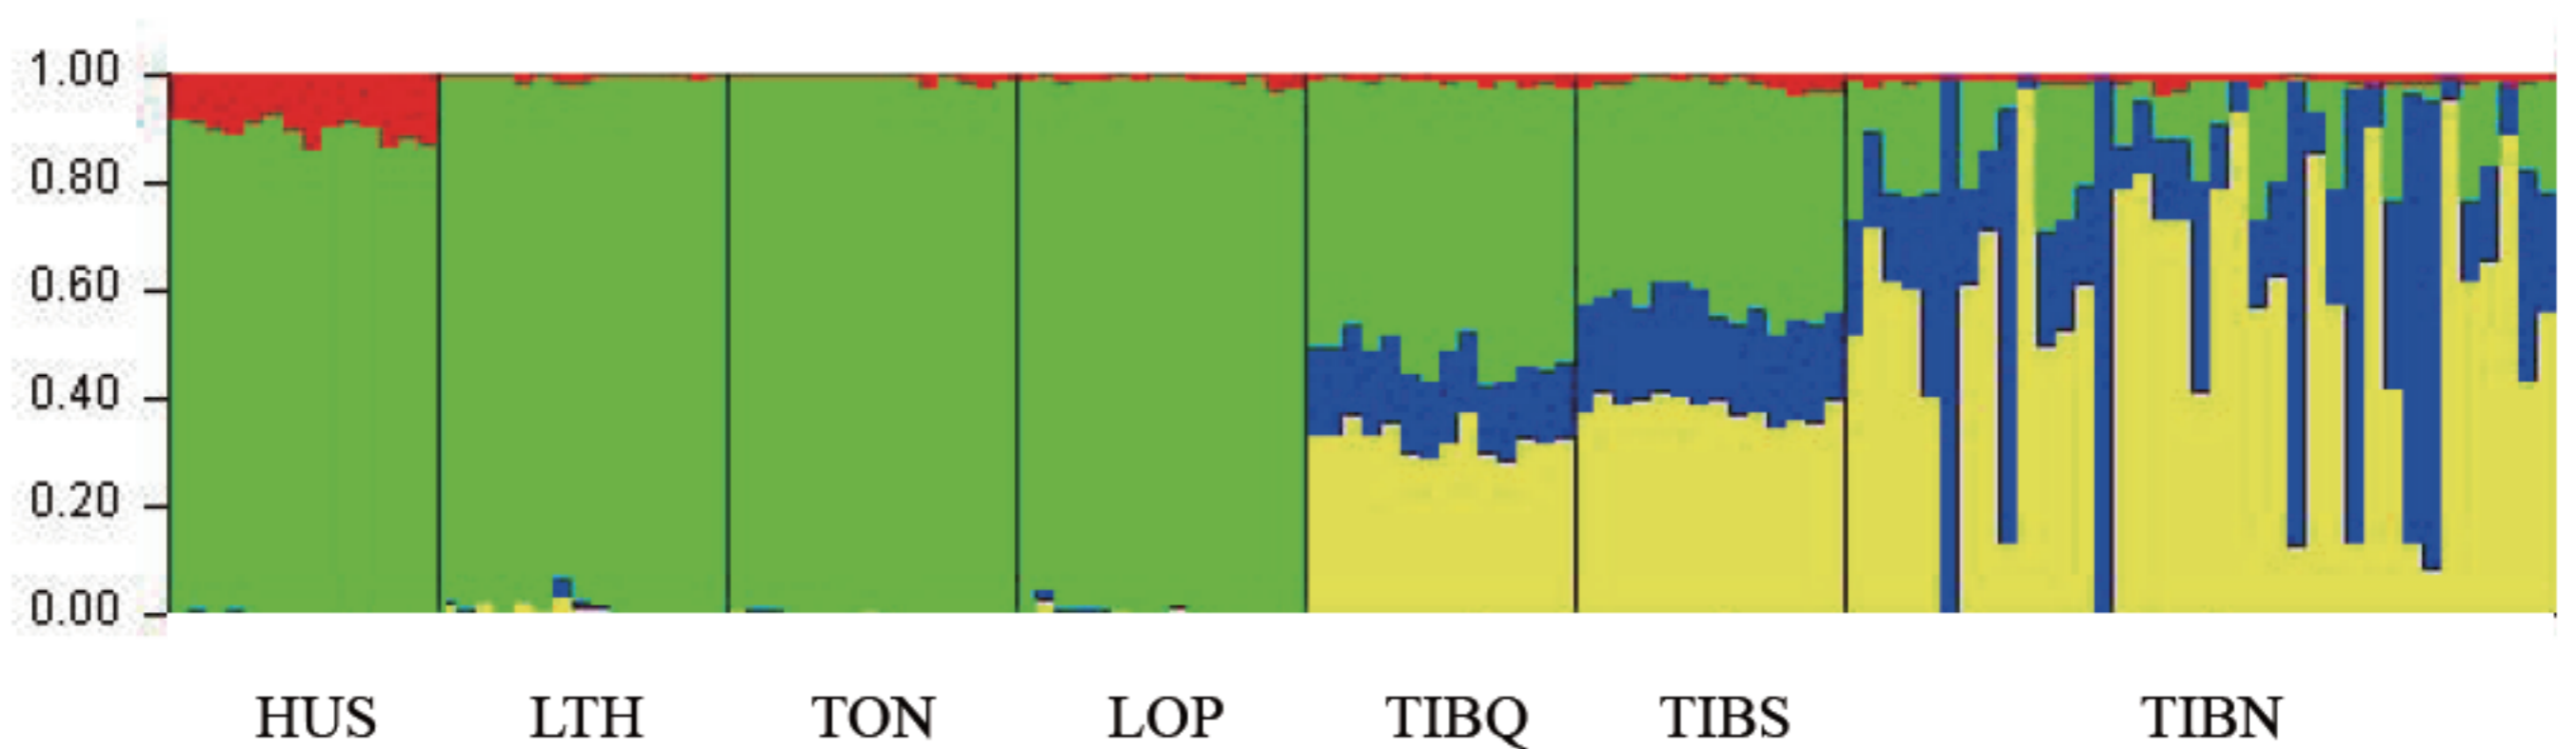

HUS

LTH

TON

LOP

TIBQ

TIBS

TIBN

Figure S2. Structure analysis on all the individuals with K=2-4. The abbreviations for the 7 China native breeds are shown in Supplemental table S1
